# Supplementary material for: Cep192 insufficiency underlies haploid instability in human cells
Source: bioRxiv preprint, doi:10.64898/2026.03.18.712690, version 1 (2026-03-20)
Supplement: Table S1 [file 712690_file03.xlsx]

## Sheet: YHS2026_Table_S1
ID_gRNA	Gene	HAP1_Pre-treatment	HAP1_DMSO	HAP1_1C_STLC	HAP1_4C_STLC	eHAP_Pre-treatment	eHAP_DMSO	eHAP_1C_STLC	eHAP_4C_STLC
s_43208	MTERF1	209	376	404	460	445	592	613	173
s_50911	SDHAF4	613	272	410	258	763	601	501	659
s_17562	SPATA31A3	561	581	735	713	730	796	670	559
s_6819	ODF1	627	744	631	716	765	692	707	556
s_19197	BNIP1	511	505	551	564	382	603	564	427
s_18683	IRF3	673	509	510	551	707	671	634	561
s_9509	CA2	357	237	260	255	273	303	257	146
s_56028	CORO1A	533	532	640	633	720	968	1057	807
s_8347	DIRC2	707	908	632	927	671	823	655	858
s_29820	SV2C	601	597	537	543	716	742	679	427
s_54949	ZNF624	234	272	166	88	260	259	291	90
s_34859	GOLGA8A	813	889	725	1329	864	1123	568	1200
s_20631	GATB	339	382	610	417	381	419	477	237
s_18072	GMEB1	738	661	797	753	935	977	1234	1004
s_9424	ALG14	796	537	752	550	648	665	713	868
s_13642	PEBP4	1082	1261	968	980	953	1118	1075	976
s_39947	LCN6	411	197	420	411	395	320	569	375
s_29841	MTIF2	802	1214	1139	1365	1106	1071	1029	935
s_21105	SIK2	513	653	964	535	794	760	1217	627
s_44182	GAPT	278	353	264	564	338	349	373	192
s_41520	PPP1R14D	539	530	766	576	663	734	570	278
s_6135	BUB1	391	274	484	323	579	783	665	570
s_42971	CLCN1	644	428	360	469	643	532	638	426
s_32563	FZD6	343	339	323	381	570	569	352	260
s_30269	AKR7A3	744	518	520	624	884	774	767	864
s_3717	POU4F1	568	380	483	512	662	739	828	608
s_29270	PHF1	830	431	560	628	1143	1057	748	901
s_29264	STT3A	693	438	610	650	724	1040	698	1154
s_31968	FBXO39	470	608	457	604	432	519	543	478
s_16724	CCNDBP1	417	296	586	428	576	601	729	518
s_19273	SLITRK5	406	448	451	449	403	430	482	352
s_19763	MDGA2	421	720	622	679	693	604	581	2145
s_9808	MPHOSPH10	930	957	703	1025	697	793	729	654
s_50715	FANCD2	644	660	655	587	764	852	785	549
s_905	C2CD4A	1071	1009	871	646	1024	1309	1102	909
s_24952	CES3	545	225	244	505	559	342	337	252
s_6012	RPL29	517	400	207	434	568	566	732	569
s_28918	TLDC2	840	949	785	992	757	855	1155	586
s_27986	TAS2R31	524	452	575	567	445	593	664	557
s_36343	TIMM17A	647	411	672	758	530	726	799	466
s_55912	UQCRB	629	825	842	436	1066	791	779	937
s_3724	SLC23A3	522	273	471	596	499	594	561	648
s_14150	ACTL6A	632	623	573	684	532	911	811	483
s_55444	ZNF175	524	502	559	557	464	575	506	281
s_12759	HOXD8	619	524	840	637	691	705	885	599
s_25036	MYO1C	577	368	396	250	506	447	579	303
s_50133	PLEKHA7	482	513	647	944	552	410	604	412
s_30482	FAR1	1014	1000	886	1377	1032	1119	936	1040
s_3990	OR5K2	872	1002	860	806	788	840	1015	929
s_16329	STK38	1141	688	434	622	1265	1258	803	930
s_42255	C1orf64	596	473	686	436	565	645	636	401
s_39992	DECR2	484	485	526	945	567	551	399	443
s_43256	PPP3CA	207	292	266	651	402	437	399	400
s_10510	NCAPG2	398	323	381	353	373	642	394	280
s_16549	RAPGEF4	471	151	154	422	517	424	182	248
s_2259	MCL1	764	585	418	606	722	806	697	668
s_48416	METTL14	690	651	576	901	603	658	748	955
s_23272	AMT	435	514	378	779	492	681	480	646
s_13105	TRPV3	1086	494	713	571	1263	936	1302	687
s_37892	RPL36	630	502	429	490	574	437	738	369
s_44174	EBNA1BP2	709	687	572	919	745	820	752	749
s_22756	MTUS2	357	322	600	480	470	603	694	614
s_52021	TMEM25	391	346	261	544	601	741	781	523
s_41317	PNPLA8	590	779	1025	836	784	1062	1147	842
s_10390	ARSG	331	477	372	287	388	348	265	165
s_47346	CHORDC1	804	927	600	930	821	971	963	906
s_9319	PIM2	520	1260	718	1459	461	687	497	519
s_16964	CCDC60	362	584	448	777	762	532	675	299
s_39191	MST1	468	698	406	383	600	392	625	312
s_39023	RGPD4	497	746	890	729	818	622	785	909
s_12761	FOXN4	774	418	163	210	1061	755	416	494
s_3482	ITGB1BP2	471	750	634	815	504	635	638	467
s_49447	ZHX3	493	666	931	968	533	728	690	334
s_1234	SLC6A4	785	678	689	536	817	1086	913	1065
s_54442	OR2B3	361	75	457	174	407	511	384	553
s_8975	UBAP2L	930	1749	651	1312	778	1813	1646	1374
s_49534	DBX1	415	331	547	794	348	434	335	338
s_50651	APTX	621	287	532	1025	731	964	568	889
s_13711	GPR61	464	601	354	430	483	500	459	610
s_13600	ZNF98	579	862	433	483	806	691	786	443
s_10450	ZYX	341	71	210	145	774	363	316	207
s_47624	LIG1	639	240	447	393	657	761	676	431
s_34193	MAPK8IP3	795	830	786	927	902	864	841	654
s_15305	ALKAL1	581	419	510	644	599	615	653	441
s_41584	LMNA	666	634	924	917	920	1452	1318	1050
s_50709	FAM205C	418	353	520	466	441	567	602	490
s_50196	TES	829	563	717	669	737	694	891	934
s_53865	IQCF5	654	526	712	330	523	683	583	846
s_12085	KRT27	363	315	301	354	295	276	302	401
s_37098	FAM186A	725	1869	1587	2434	834	791	593	745
s_13423	HELT	449	460	688	395	472	454	561	387
s_19394	XKR8	337	15	166	145	437	361	205	599
s_8776	MRPS25	736	696	981	1143	860	915	909	671
s_9677	TAF5	767	954	695	825	865	794	818	492
s_349	CD2	597	664	593	447	731	633	732	769
s_40911	MEGF9	428	754	417	350	604	611	545	478
s_7373	ABCA3	1224	1152	723	965	1309	1494	1198	886
s_51271	RHOQ	766	605	445	672	800	904	712	544
s_54112	OSGIN1	612	355	357	627	506	452	326	504
s_1958	METTL13	477	588	570	1039	479	765	530	398
s_14193	NXPH1	393	336	365	372	498	577	602	480
s_51797	TNFRSF10C	522	121	273	249	532	512	660	477
s_10745	KCTD9	436	388	715	408	519	791	511	733
s_28392	FXYD6-FXYD2	804	815	790	866	905	843	1174	1178
s_47747	FAM186A	655	593	390	662	596	909	784	824
s_5730	PIGH	223	233	156	289	329	322	346	172
s_13360	TCEAL6	1019	758	1667	704	1494	802	2102	764
s_15538	TTC28	625	912	1099	658	839	1030	1293	759
s_49826	IKBKB	506	257	720	271	800	390	773	469
s_24231	VWA5B2	304	189	205	269	325	283	251	237
s_23946	MARS2	324	191	504	647	553	357	333	421
s_38521	OR12D2	426	557	492	630	548	832	505	641
s_10282	MED19	424	391	296	596	502	585	556	392
s_10465	SLAMF7	820	771	612	853	706	642	843	607
s_12089	SSX7	676	997	599	661	734	650	811	350
s_701	TMBIM6	561	570	612	789	727	858	808	701
s_51846	TRAPPC4	122	177	188	154	301	287	340	193
s_38580	RCOR1	744	751	839	1048	828	897	850	811
s_36531	RXFP2	539	558	659	556	517	669	647	422
s_28787	CSN1S1	187	53	79	82	304	342	254	164
s_33621	DPF1	456	373	355	474	482	497	537	502
s_685	DEFA6	460	321	338	374	387	373	377	317
s_1105	CSPG5	1460	1380	997	1227	1345	1392	1310	946
s_14492	PHLDB2	263	125	389	378	270	328	415	271
s_30712	AP3S2	790	800	762	658	755	810	769	579
s_27727	TRPC3	664	321	611	837	785	741	712	559
s_53447	CD151	1009	721	1439	891	1172	1364	1057	605
s_51279	LPO	489	454	519	515	724	735	610	627
s_24755	TMED6	643	725	915	793	618	744	601	642
s_35194	DUSP7	498	519	650	845	495	743	686	422
s_55890	SPARCL1	606	627	608	569	593	768	530	675
s_7654	ZBTB6	609	1140	648	942	715	923	777	599
s_3293	ABCG1	434	616	552	449	608	541	720	778
s_34394	WDR47	576	701	764	587	588	824	803	640
s_5115	FARS2	690	942	553	621	760	865	701	881
s_52652	SASH3	923	1231	632	810	776	1096	792	818
s_7192	STXBP5L	798	947	866	955	967	1244	1102	636
s_5774	ARMC5	580	220	385	432	568	389	615	449
s_31788	TRAF3	214	259	330	307	375	427	392	231
s_42850	P3H4	441	532	578	403	619	737	595	714
s_5928	MAT2B	474	733	512	805	785	806	558	388
s_39221	GLTP	709	476	795	490	712	697	731	571
s_42988	PPP1R11	590	500	451	450	521	514	580	337
s_30423	TRIP12	450	343	476	255	503	617	631	625
s_42032	NAV1	516	242	320	527	718	732	401	352
s_44471	MTHFD1	927	901	720	790	929	898	1077	707
s_40777	TRNT1	916	1172	787	936	741	876	633	796
s_55001	SHTN1	400	611	453	471	405	446	602	400
s_45192	TMEM238	701	644	474	626	842	1028	544	781
s_3569	ZNF181	340	575	405	270	414	407	376	215
s_12815	HTR3D	938	859	360	672	795	713	667	1012
s_7374	NUF2	1023	887	843	934	1006	1432	901	1089
s_10163	DEFB125	496	479	451	346	472	533	400	556
s_50868	MRPL18	351	118	204	288	594	329	470	277
s_14305	VPS72	281	234	284	298	227	180	255	239
s_12254	APOBEC3A	275	22	49	60	258	147	100	105
s_47194	NO-TARGET	528	612	578	520	555	764	564	602
s_45543	SLC38A10	711	692	630	1010	1178	960	1118	1028
s_39193	NO-TARGET	473	583	417	408	340	499	431	530
s_53494	RGPD1	814	670	627	495	706	926	694	414
s_41034	NRBP2	895	921	1333	1101	922	1123	1203	679
s_23755	GFRA1	325	291	426	450	369	507	424	461
s_28721	ARGFX	417	341	401	513	444	558	525	314
s_24511	DNM1	820	817	896	840	767	944	931	970
s_5771	ZNF513	577	813	533	634	938	1094	772	775
s_22371	ARRB1	210	138	152	143	225	280	191	159
s_4159	VWA2	495	282	275	524	472	514	428	781
s_54175	NFIB	491	315	425	460	508	659	539	537
s_49426	GRK1	643	324	508	457	504	535	595	784
s_41424	LIG1	742	636	710	597	688	816	716	982
s_48250	LAT	465	715	722	640	670	563	550	456
s_5144	CSF2RB	493	750	427	278	391	467	558	404
s_50272	RP2	423	336	526	367	628	537	603	459
s_20968	KDM7A	250	142	199	293	281	396	372	265
s_55332	DMRTA2	363	657	307	390	442	493	589	559
s_14072	C11orf52	561	852	677	895	694	930	522	494
s_34586	NIT1	463	106	177	271	589	766	486	447
s_38458	ALDH5A1	894	994	841	895	1077	1079	1014	1122
s_24666	PRUNE1	508	631	619	819	585	622	799	775
s_49982	PLEKHA3	458	587	423	867	558	749	589	487
s_8179	COX20	444	343	222	380	404	404	483	431
s_44165	OR6C1	487	717	496	766	553	649	672	581
s_37387	RCAN1	591	718	498	521	722	748	749	512
s_11924	LMO1	403	250	278	327	328	246	344	280
s_42420	RAB22A	317	172	525	423	451	474	336	293
s_44253	DEPDC1B	468	322	269	323	603	533	714	384
s_3888	FEM1B	421	203	243	299	333	465	250	294
s_4524	XYLB	561	467	697	466	675	751	755	449
s_30647	FGGY	384	595	566	615	681	969	910	657
s_37659	C1orf27	416	444	340	256	379	331	312	129
s_5264	AR	689	219	468	564	514	495	813	695
s_28338	ADGRA1	596	85	161	300	1005	483	582	477
s_10870	SDCBP	810	651	619	685	732	790	643	699
s_32450	FAM92B	406	328	357	208	553	445	432	275
s_11581	MUTYH	265	262	425	469	385	497	394	434
s_21431	OLFML2A	441	434	478	583	698	676	680	411
s_23139	FOXI1	543	840	578	698	639	685	625	670
s_52809	TEF	402	246	390	272	398	466	377	425
s_26736	PCDHGA12	168	256	203	281	305	477	354	265
s_43369	CCDC151	400	250	372	425	571	612	452	284
s_44073	FCRL3	742	455	697	927	813	853	903	539
s_21341	COX4I2	786	1011	914	1003	1075	1374	964	1205
s_55295	ABHD10	377	300	316	277	292	345	313	225
s_48290	MRAP2	570	506	319	524	641	375	487	418
s_13762	DNHD1	660	711	549	678	834	966	882	803
s_55573	GALC	347	650	478	491	476	446	443	388
s_51087	BTBD8	408	230	460	316	415	403	402	250
s_41887	PRRG4	454	471	395	465	580	725	730	713
s_8983	PILRB	575	762	730	574	740	753	788	671
s_14565	SAP130	283	231	315	354	654	548	640	431
s_6857	ALOX5	623	530	486	527	679	711	661	573
s_18643	ZNF816-ZNF321P	604	705	713	788	970	836	851	897
s_33878	SLC11A2	666	553	511	396	652	583	694	591
s_46229	MCTS1	460	265	217	300	543	841	508	831
s_15541	HSD11B1	715	562	797	406	609	637	654	619
s_54054	CD101	345	314	351	396	247	368	246	99
s_47157	ZNF784	390	481	426	496	470	529	468	337
s_39209	CSRNP3	274	79	131	235	325	357	326	166
s_12720	TMPRSS11B	395	466	444	441	458	436	346	303
s_22585	ULBP3	580	506	625	707	672	761	681	777
s_11653	ALKBH3	574	484	464	528	583	402	603	579
s_17344	GJB6	545	684	481	773	749	685	855	827
s_5328	LILRB2	146	26	99	90	127	65	87	39
s_28068	MEFV	470	653	579	725	564	679	634	671
s_30821	GPRC5A	659	490	278	377	784	411	324	459
s_22516	CBR3	328	231	448	676	405	535	493	472
s_35772	LIN9	695	497	595	1035	897	999	939	730
s_2354	GSPT2	667	603	551	688	486	654	548	298
s_19097	TRPM2	675	1085	900	758	777	741	982	998
s_39370	MTBP	503	336	739	467	519	421	628	380
s_22128	EFS	743	651	1158	461	884	553	992	1153
s_44584	SFXN1	179	188	182	293	255	138	229	213
s_50614	PPIA	619	638	495	465	628	660	470	668
s_43683	PAMR1	267	339	409	406	471	623	449	596
s_7674	DNAJC22	668	583	537	765	750	785	734	726
s_50537	RPP21	777	1017	1129	702	788	1112	1048	677
s_16072	FAM213A	601	465	541	705	591	570	957	822
s_20982	ORC2	407	444	403	605	468	725	612	628
s_24330	FLII	709	492	924	636	944	895	1001	886
s_6231	CD200	979	1308	1536	1450	1084	1332	1196	973
s_54842	CYP3A43	590	742	602	527	636	729	918	751
s_177	C10orf55	953	705	452	1273	932	1196	694	1061
s_52535	PXDC1	906	707	604	537	815	719	541	454
s_38472	MDGA1	678	729	730	515	758	709	945	706
s_53225	GPAT2	1020	809	903	1031	1049	1255	1252	1255
s_23535	CENPN	361	488	611	540	513	534	471	284
s_53771	RAPGEF2	337	221	265	359	569	394	325	429
s_52990	PDS5B	593	891	620	797	816	795	827	729
s_31517	OR1K1	451	810	530	438	466	487	372	368
s_42832	ELK3	267	230	249	179	309	322	303	125
s_2652	DLG2	334	539	294	275	417	360	350	300
s_12393	PLXNB1	514	538	552	469	502	410	602	446
s_56040	MSTN	648	793	1434	740	830	1200	1231	917
s_30072	DCPS	715	300	1036	819	755	811	1181	680
s_4336	ZC3H8	323	423	441	407	422	269	342	365
s_2821	TNMD	651	638	573	1016	516	418	541	350
s_44409	CDC26	361	454	361	760	637	559	384	448
s_28602	ACO1	915	799	624	752	795	553	598	525
s_49284	NAB1	309	237	323	514	250	368	332	207
s_49114	GADD45GIP1	474	545	389	326	524	527	417	431
s_8603	SLC12A8	694	951	656	776	851	958	1038	652
s_11647	SYDE1	835	869	636	1043	780	771	654	730
s_2846	FAM71F2	518	731	474	440	445	418	599	309
s_19701	THOC1	830	997	883	670	936	1129	909	719
s_41387	TPM1	876	940	1098	1515	1211	1257	1501	635
s_37457	NO-TARGET	563	517	807	314	561	541	681	518
s_15181	RBP2	436	400	366	295	449	572	477	424
s_11899	LGSN	979	752	1283	1150	1014	1166	1451	1346
s_278	NPM3	339	594	499	410	529	580	539	365
s_52813	KLK2	865	1073	1171	926	1086	941	1188	1133
s_4650	OR10P1	657	477	591	468	650	485	542	484
s_9133	ZNF706	421	425	466	329	533	541	527	405
s_27066	URM1	678	718	792	737	754	830	734	460
s_17406	CMTM3	718	294	572	836	635	794	535	391
s_8312	TM7SF3	467	977	1432	1392	903	986	1857	1157
s_150	SERPINA10	269	240	291	373	318	304	293	415
s_17292	TIE1	531	529	496	265	545	463	442	434
s_38162	RPA1	525	412	366	404	462	671	484	470
s_8821	FAM222A	567	569	510	717	531	557	544	494
s_15614	SLC25A23	442	493	375	534	532	520	383	523
s_4961	CHID1	1392	1914	5171	1856	1365	1715	3494	1310
s_18003	ETV7	667	638	453	665	608	714	560	619
s_2340	CEACAM7	533	211	97	190	553	409	233	572
s_44026	AKAP10	239	473	240	200	244	382	327	307
s_35620	BAMBI	758	1330	1620	1809	886	576	629	688
s_50968	GKN1	543	775	592	1014	631	444	464	299
s_53187	UGT1A6	913	988	958	914	941	1071	1152	1031
s_30238	MAL2	481	365	134	484	823	588	557	444
s_36014	DGKE	860	296	181	361	728	818	322	583
s_55375	C1orf100	377	217	312	319	326	258	316	217
s_25926	COLEC10	251	183	264	207	179	204	231	168
s_44346	PRAME	697	507	856	358	673	839	801	514
s_44757	VPS37B	780	568	617	483	821	843	580	483
s_15388	NO-TARGET	327	331	255	284	334	362	250	230
s_50816	PIGH	301	351	381	260	372	495	374	294
s_56388	OR4C45	615	535	511	650	663	765	673	686
s_47035	MAPK1IP1L	450	219	173	371	757	625	357	657
s_4993	AKAP9	706	657	469	453	713	668	578	594
s_17131	BCL7A	465	333	457	436	557	664	476	328
s_16584	SLC35D2	730	738	697	931	877	946	1038	776
s_27401	AMELX	377	353	247	393	320	415	292	473
s_29657	NO-TARGET	688	739	504	536	603	933	792	707
s_53642	COMMD9	721	640	668	746	854	1004	988	914
s_28032	APELA	451	413	474	440	345	403	452	296
s_52666	LAGE3	856	889	791	1047	937	847	730	514
s_19619	DNAJA3	468	507	406	617	601	454	491	363
s_31460	HTR5A	541	467	655	419	536	794	551	556
s_18249	STRN4	342	52	50	231	516	373	150	318
s_18723	TBC1D19	392	256	710	839	531	593	776	512
s_11576	AKR1C4	474	256	209	433	614	859	789	618
s_2491	SELENOP	604	475	658	708	587	515	611	549
s_1302	S100A2	835	639	620	908	1286	1003	894	1095
s_36663	MAP2	569	518	231	347	689	766	228	666
s_53149	FAM185A	561	596	502	665	391	706	509	525
s_35985	DBNDD1	456	614	183	451	722	643	524	529
s_33808	QDPR	684	252	632	479	730	657	724	479
s_2345	CACNA1S	621	529	249	453	492	622	485	255
s_30380	TRIM32	1316	1137	912	1287	1265	832	928	672
s_12887	RAB41	760	678	597	871	983	775	853	571
s_6828	WFDC3	979	1007	465	511	875	1233	894	942
s_7059	FANCD2	891	782	568	736	895	982	721	621
s_35891	WDR20	498	124	127	268	518	175	180	202
s_27314	USPL1	602	432	224	693	534	418	417	378
s_45865	KRT4	300	508	336	373	501	482	386	270
s_28097	JTB	697	574	474	838	525	480	758	684
s_13598	ZNF675	626	627	450	539	968	1008	655	1067
s_19665	LAMP3	364	349	335	517	484	613	567	616
s_19291	PLAUR	522	628	422	700	496	573	512	795
s_12086	LRRC37A2	513	356	576	361	614	699	849	485
s_9369	USP25	426	544	358	583	507	612	557	457
s_2102	TSPAN16	793	558	459	701	853	706	818	604
s_38668	C16orf72	661	603	563	473	771	852	712	894
s_17207	SHANK2	1665	1231	1522	1122	1798	1316	1693	1874
s_44332	LDLRAD1	543	408	118	576	704	729	370	651
s_53111	ARSK	942	1509	1019	1193	1113	1316	1160	1261
s_50319	ZNF304	841	697	886	1136	796	990	879	492
s_37023	C17orf99	700	809	484	470	721	755	678	455
s_18784	BORA	604	417	693	829	661	783	548	468
s_10115	RHOXF2B	1322	816	1409	1247	1187	1264	1433	1029
s_38523	KRT1	594	336	169	590	838	884	825	1260
s_28649	CHI3L2	693	768	1176	1089	862	966	898	1138
s_26087	LMAN2	466	386	281	365	538	548	626	822
s_19063	RNF157	318	503	421	427	668	849	641	763
s_10734	HTR6	633	1588	688	1008	727	1235	1243	1143
s_32089	RABL6	360	417	439	355	410	275	334	249
s_27502	MARCH4	556	347	499	488	643	599	599	627
s_54051	NPIPB5	362	404	372	478	602	721	599	643
s_41407	CDC34	267	190	204	168	434	329	229	504
s_4779	N4BP2L1	571	453	597	595	677	655	670	874
s_33832	CTHRC1	626	454	423	830	589	720	576	514
s_33932	CENPB	588	413	363	429	520	715	376	561
s_33029	MCM4	562	83	270	278	731	929	515	439
s_6502	ABCG4	1020	1169	808	819	1052	1116	893	1271
s_45523	HMGCS1	506	670	439	384	526	545	480	478
s_55592	CHAT	1002	1055	1167	1416	1126	1156	1266	1088
s_54184	ASIC2	753	515	579	606	929	1076	892	851
s_7502	ADRB3	393	529	1400	727	632	572	934	940
s_17281	COPB2	508	495	363	653	490	548	416	400
s_51581	KIAA1210	496	402	248	382	634	690	505	429
s_18407	EFS	738	937	771	719	847	990	838	769
s_28960	TBX3	675	1068	849	645	755	1001	921	635
s_12099	TNS3	1195	1559	1452	1450	1244	1556	1738	1208
s_5653	PSCA	438	534	573	353	730	680	755	631
s_50071	POLR2H	412	283	264	399	576	581	648	309
s_28113	HMMR	563	736	354	509	738	602	611	385
s_20047	CNEP1R1	436	136	306	394	554	554	512	492
s_40191	COL23A1	425	548	404	779	569	840	709	492
s_28555	NACC1	817	474	708	874	748	630	693	463
s_28820	PHLPP1	387	117	251	282	403	218	385	458
s_35517	FOXO6	632	342	232	257	576	660	570	606
s_18318	PCP4	847	729	643	843	774	542	772	541
s_34903	GLE1	632	894	556	1095	765	797	875	622
s_4527	RNF6	543	473	574	942	555	655	939	325
s_41950	UNKL	750	977	1000	1132	929	1149	1205	772
s_40662	CC2D1B	420	341	570	647	651	633	704	431
s_7183	LIM2	623	539	423	608	615	745	561	429
s_2241	CTSW	1051	1100	1050	1144	1157	1342	906	1059
s_8691	ALLC	462	266	269	328	841	606	858	503
s_45508	TAF4	503	243	462	798	707	616	689	1676
s_8873	FAM196B	454	508	356	541	353	465	369	477
s_45158	VNN3	583	436	468	617	567	528	423	344
s_21248	BBS4	305	270	454	544	351	465	378	225
s_9534	FER1L6	593	382	324	269	394	332	306	418
s_25225	BORCS8	411	588	454	477	385	599	400	314
s_12154	VSIG4	1055	803	925	976	901	1111	924	647
s_43002	ZNF546	581	594	636	794	724	541	815	916
s_13773	ZNF493	533	430	494	488	522	587	522	615
s_46440	TRIM44	719	642	632	907	796	1005	1020	575
s_49128	KDM7A	548	392	654	906	772	367	604	355
s_47240	CTNS	607	693	734	866	803	909	925	856
s_13169	METTL21C	633	851	570	650	825	775	672	726
s_15009	CAVIN4	325	806	479	566	530	448	526	366
s_50056	YIPF6	540	853	908	660	847	944	1195	1274
s_40281	GRIK4	648	350	450	760	596	545	607	465
s_52566	CHCHD2	836	923	1023	692	918	983	941	579
s_6666	THBS3	1032	804	1013	1443	1336	1344	1071	1531
s_50357	VAMP5	860	897	807	615	995	1153	1049	1243
s_36687	TRIM25	539	669	435	284	457	658	430	393
s_44990	LRRC34	690	778	564	884	767	723	925	594
s_54219	IFITM10	677	886	708	543	959	977	841	621
s_48417	BCL9L	615	458	370	349	678	403	456	345
s_55710	MIGA1	327	444	604	440	616	932	669	472
s_52232	PALM2-AKAP2	528	287	234	452	774	655	574	386
s_28921	ADAMTS12	620	662	486	679	747	676	748	561
s_30323	SRP9	585	493	716	449	897	1056	848	1268
s_28419	TPK1	664	423	594	627	659	814	745	438
s_25053	CLK4	396	219	292	218	332	380	261	407
s_46881	GLB1L	321	517	251	360	468	436	273	331
s_18259	PYCARD	726	547	493	859	518	618	379	1006
s_8246	TAS2R31	536	216	280	360	558	484	383	560
s_27256	RNASEK	595	486	564	514	857	958	704	798
s_8353	SYT13	323	214	309	290	392	394	384	103
s_27242	GKN2	413	802	429	443	539	862	695	569
s_10617	MAB21L3	480	657	592	599	695	652	789	513
s_49452	PTRH1	369	369	240	255	278	409	333	388
s_29473	TAF8	754	876	1041	1315	628	860	778	755
s_42370	ADARB1	588	629	571	683	732	1010	769	784
s_45767	AMOTL1	734	976	664	548	804	846	838	598
s_3196	FAM151B	187	333	142	411	387	262	353	567
s_20222	LCE2D	559	224	537	353	461	642	620	573
s_49681	COL26A1	459	364	335	349	664	561	489	475
s_42612	SIX5	229	181	148	175	408	259	116	227
s_34702	TBCK	555	477	445	576	523	406	692	475
s_2872	RBM15	645	741	698	424	696	963	877	659
s_25252	PSMB6	520	906	437	630	728	907	648	759
s_24029	HGH1	749	524	651	1081	785	636	765	850
s_42617	SLAIN1	505	310	433	384	470	382	496	272
s_53062	DSCR3	442	411	413	821	571	734	547	431
s_18399	CDC42BPA	343	437	447	283	448	534	314	474
s_41216	IL17REL	675	835	753	734	791	769	641	401
s_31221	OR51I1	444	225	440	371	533	507	672	470
s_23792	SHC4	488	478	571	976	565	543	715	454
s_24692	NOL10	722	791	1055	1288	779	831	1012	596
s_52231	UBXN7	576	543	715	746	791	918	871	724
s_56709	SH3BP5L	521	637	561	553	651	659	547	747
s_46384	PPP2R5A	528	572	422	596	637	707	600	838
s_45256	JAG1	367	188	160	148	386	253	227	186
s_55790	VEGFD	736	716	693	715	652	1000	1016	744
s_44641	RNLS	568	413	364	625	657	640	641	581
s_13811	CYP11A1	629	645	531	941	1032	1183	892	1028
s_13494	CHID1	1008	1379	2686	2193	1125	1580	1754	1670
s_47191	RNF26	328	131	109	223	371	236	237	248
s_39498	CHIA	495	429	299	429	501	717	476	550
s_10806	EVX1	740	731	670	457	720	874	648	733
s_24070	RNFT1	638	623	433	544	671	854	744	613
s_19992	ALKBH4	282	459	406	390	514	330	472	607
s_14483	TRAP1	605	608	560	861	586	565	511	526
s_36777	TUBA1C	371	407	385	748	545	592	591	746
s_46269	C19orf81	977	1011	830	1634	859	913	666	767
s_11085	C10orf12	1424	1437	1741	1088	1487	1506	1646	1031
s_53486	ZNF423	569	461	510	741	670	773	670	479
s_19101	FBXL16	590	504	702	670	728	926	808	454
s_54422	ABCC12	339	398	405	730	511	530	479	365
s_44018	CD1C	228	214	238	170	253	343	253	356
s_34513	C19orf84	714	741	743	491	707	863	657	887
s_53013	HAS3	815	734	640	595	792	984	1029	674
s_20257	MAGEE2	269	352	465	480	275	378	291	435
s_33704	CTU2	549	601	379	227	596	729	571	1055
s_35698	C1QTNF5	311	134	59	202	387	388	288	256
s_25171	SRPK1	340	400	291	178	430	627	409	254
s_3083	ICMT	229	80	170	256	496	513	411	547
s_7100	ERV3-1	822	1049	976	1012	1008	1709	1123	1217
s_756	CEACAM1	341	217	144	244	374	258	391	631
s_28015	STARD8	372	317	219	304	478	560	382	411
s_54379	URM1	699	361	566	747	506	610	737	673
s_13460	NDUFA12	608	583	620	844	663	480	624	838
s_24093	SPIRE1	940	1130	1102	1474	919	852	1162	1203
s_55164	DDX6	339	771	288	558	477	565	464	298
s_31793	ANKHD1-EIF4EBP3	277	201	393	254	434	533	582	308
s_52095	ZW10	399	349	475	439	528	835	484	389
s_34389	CYP11B1	131	142	73	161	446	455	204	398
s_11079	RFNG	364	482	494	588	539	610	598	760
s_29924	HECW1	888	867	566	629	814	927	870	883
s_20971	CBWD6	229	135	193	325	271	143	192	105
s_51152	GBP2	851	1072	884	1008	1061	957	1080	821
s_3290	HSPA8	247	196	225	387	259	298	204	206
s_44874	DUSP27	448	463	805	640	685	708	1184	756
s_22654	DNAJC5	292	461	586	560	426	333	433	254
s_47218	FAM47B	490	759	495	515	710	686	700	556
s_5347	ZNF486	680	643	603	536	1002	807	792	726
s_44205	ELOA2	723	417	406	517	688	583	839	702
s_18273	PCIF1	384	568	318	624	486	362	556	717
s_7945	BMP3	728	780	407	1084	784	826	765	629
s_41664	MTHFS	419	626	550	909	696	671	701	580
s_5695	OR6C4	570	555	330	519	786	683	621	612
s_19006	DEXI	510	896	862	1040	719	650	591	377
s_39291	METTL23	289	170	134	553	693	356	311	374
s_29074	ESR2	742	613	489	599	690	829	897	501
s_7708	TSPYL5	811	1003	863	1248	746	707	759	538
s_29927	MTRNR2L7	362	291	382	475	362	346	410	378
s_55047	DNAJC18	302	220	214	215	254	276	176	174
s_47792	RGL1	508	512	790	667	515	746	766	414
s_53941	CRCP	490	353	560	458	466	671	622	396
s_52219	CNTLN	1336	1404	863	884	1483	1456	1396	931
s_23891	CENPQ	982	975	1187	1525	1040	1339	1027	1120
s_27508	DR1	550	1101	497	941	725	817	666	637
s_1580	CCDC77	1124	1029	948	989	1081	1116	923	893
s_14175	C7orf57	484	114	427	253	527	222	698	340
s_7664	PCDHA5	920	727	836	1097	890	939	844	1073
s_5820	MUSK	709	870	827	699	791	738	819	749
s_55862	HIP1R	731	390	572	402	937	367	321	356
s_11866	ABCC6	397	539	395	851	568	485	339	336
s_41401	ZNF496	481	393	445	320	530	797	578	672
s_9190	MTERF1	353	283	297	303	285	526	321	274
s_29166	PRDM14	702	796	866	936	753	986	686	402
s_18462	COQ6	632	318	492	407	819	854	989	519
s_2516	LINGO4	200	306	161	470	250	413	120	255
s_52493	PRLHR	984	913	701	851	711	1015	870	701
s_9331	FBXO31	459	673	403	417	476	352	420	665
s_1642	ZNF345	563	473	377	511	501	391	679	538
s_45066	RSPH3	893	897	850	1202	874	825	972	1068
s_11683	CX3CL1	815	633	579	572	635	878	882	591
s_18722	RXRA	597	270	507	542	586	803	698	500
s_15853	CEP250	178	56	83	247	169	178	195	196
s_49482	ZNF570	159	165	257	322	325	267	352	223
s_51273	LAMC2	543	223	377	366	578	656	528	568
s_22715	GSAP	455	63	445	414	608	370	346	181
s_35324	PRRC2B	695	687	719	1012	871	863	697	620
s_5196	SSTR1	669	728	711	736	705	952	847	707
s_51599	KRTAP17-1	424	462	382	609	698	806	599	557
s_3421	SPPL2C	643	503	592	519	534	464	516	441
s_44964	DMRT3	415	97	174	93	734	554	231	330
s_36098	KLF2	333	365	314	372	408	744	528	603
s_50048	ZFAND4	647	859	831	942	809	856	775	747
s_36692	NYAP1	955	1269	679	961	831	1282	707	1191
s_21502	EEF1A2	326	166	335	279	596	540	408	327
s_52027	ATP5L2	801	759	890	975	995	1036	1179	821
s_34703	ANKRD6	575	552	748	826	888	910	1028	809
s_36399	REEP4	406	608	214	363	511	682	567	392
s_25230	MAP3K20	640	557	505	754	671	706	598	485
s_9441	DERL1	387	462	333	609	392	441	421	304
s_40570	KIAA1683	468	537	465	1060	587	469	317	495
s_25774	DCAF1	344	576	368	619	431	580	502	361
s_19187	CD83	534	641	308	631	609	508	608	495
s_129	SLC9A4	545	637	526	407	497	658	582	508
s_16899	RNF138	330	266	78	109	442	357	447	341
s_27843	TRIM34	844	597	947	1099	786	738	1105	802
s_31313	RBFOX2	474	199	233	329	530	494	516	626
s_20341	VDAC2	603	708	553	881	570	710	629	837
s_27329	ZSCAN12	531	569	613	841	661	641	758	746
s_17987	MPI	418	313	240	557	545	406	496	341
s_3353	CENPO	405	695	347	532	571	573	684	584
s_52051	CEP68	576	429	208	581	411	566	333	378
s_1205	MTUS1	883	605	546	1070	812	931	753	699
s_52747	UNG	589	277	279	528	872	647	492	536
s_18365	SSTR4	789	733	714	982	1018	822	1198	999
s_34120	SMAD1	278	269	215	361	441	365	283	435
s_21133	SGSM1	126	106	66	194	262	182	348	154
s_34673	TTLL7	471	520	372	563	581	685	997	610
s_1711	WFDC2	940	551	481	604	1051	880	712	840
s_9700	APOBEC2	515	487	356	360	339	527	349	386
s_40677	RASSF3	474	556	482	849	817	809	719	854
s_14188	CDH16	390	96	103	163	624	512	373	651
s_30677	SLC5A1	887	578	607	703	728	586	783	514
s_22821	RAPH1	796	1015	868	698	784	1124	969	1025
s_12646	TMEM74B	622	510	537	620	550	605	478	627
s_52855	GATAD2B	670	702	654	700	710	1035	789	778
s_37375	TARS2	302	398	352	519	503	656	610	678
s_25276	TXNDC5	379	130	481	282	521	623	631	496
s_46453	PRKAB2	732	870	646	1034	657	672	732	633
s_45661	DNM3	507	439	295	617	504	560	571	497
s_16867	ADRA1A	430	185	520	411	563	601	411	469
s_17348	CSGALNACT1	612	340	372	734	1007	691	1055	771
s_1129	MYBPC2	900	825	1193	1165	1028	898	886	782
s_13590	KAT8	505	511	606	728	607	772	587	744
s_20088	LTBP3	567	427	529	596	609	687	687	476
s_31053	GPR37L1	543	434	481	958	803	809	503	694
s_54529	PXT1	564	221	405	618	406	333	498	142
s_25480	C8orf37	440	281	330	385	466	634	373	388
s_4261	CKAP4	756	508	617	684	718	768	794	671
s_45456	CYP2D6	878	575	538	856	1013	1047	773	999
s_18688	UHRF1BP1	492	429	410	360	626	631	622	442
s_140	LRRC2	316	187	454	208	352	462	421	117
s_55879	STAT2	331	21	24	29	612	127	127	102
s_25133	U2AF1L4	657	526	406	847	600	595	365	438
s_25532	HOOK3	558	787	678	479	548	679	689	561
s_51835	BPIFB4	444	429	573	599	606	650	588	505
s_18057	NO-TARGET	679	776	614	758	642	616	606	344
s_1117	LINC01835	719	757	694	1065	767	789	849	728
s_10458	C4B	328	283	165	331	328	362	360	335
s_47018	ZC3HAV1L	1069	721	945	911	925	937	1161	1215
s_20867	PRRG2	506	417	358	553	389	460	530	321
s_45143	SLC1A4	314	327	322	856	754	654	616	605
s_38551	ANKAR	741	679	1638	1078	973	1230	1463	916
s_56094	SPTBN5	986	1360	1129	1205	1121	1332	1344	1241
s_41507	PNISR	734	620	676	825	614	807	627	638
s_7296	DERL3	715	784	744	814	686	966	847	1072
s_2850	KCTD1	509	182	420	449	491	483	452	572
s_11600	ALLC	814	1245	916	1088	714	1160	1049	595
s_14364	ANXA7	546	444	553	708	598	449	528	516
s_41304	SNED1	575	400	297	562	735	759	677	727
s_14519	BTN1A1	307	106	247	514	448	392	277	149
s_17113	GLTPD2	247	187	203	158	254	339	252	178
s_23269	ANP32A	630	831	770	540	505	720	432	399
s_45122	SSTR5	438	468	397	576	642	590	603	609
s_9577	LOC388436	742	889	639	1240	771	689	691	601
s_535	CCDC124	526	723	570	710	606	669	747	852
s_36871	RRAGA	332	112	174	240	280	322	392	168
s_31348	GSTM2	376	439	563	460	603	544	610	509
s_49922	SUPT5H	802	644	455	886	973	833	764	753
s_44762	ADARB1	563	487	558	758	922	948	887	778
s_29044	SFXN1	658	378	556	489	588	596	559	558
s_12851	PCDHB12	290	546	365	351	230	401	220	210
s_17637	YAF2	690	582	579	629	668	931	1022	1110
s_50223	AIDA	671	1137	634	790	897	1065	679	612
s_21625	MISP3	331	272	309	470	483	774	637	635
s_3294	DNALI1	236	145	95	91	206	277	302	211
s_20174	OR51B6	410	297	260	365	360	529	519	654
s_44080	RNF152	964	640	913	1004	999	1118	968	949
s_22992	ELOVL1	380	178	438	377	588	341	351	565
s_53446	CHD2	414	764	460	805	594	556	742	733
s_15320	HNRNPUL1	561	765	514	561	764	549	634	715
s_10898	EVA1C	326	287	251	332	453	547	370	181
s_41675	FAM166A	620	580	890	661	697	801	835	732
s_51562	LINGO4	603	840	667	593	805	1070	936	1060
s_54229	GIP	341	248	162	277	363	398	433	154
s_24866	GPA33	970	617	842	565	861	935	956	1190
s_43841	PROK1	1012	718	778	979	699	950	789	1016
s_34833	DACT1	618	399	345	399	591	770	629	748
s_19716	PPP2CB	427	212	154	235	533	603	283	459
s_30899	IMPA2	326	173	411	188	461	196	453	427
s_36339	RNF5	718	519	499	518	487	675	619	482
s_358	HUS1	525	454	472	1008	764	1106	721	522
s_3245	ZNF169	650	518	616	583	500	542	593	401
s_10337	ANKRD34A	353	487	212	289	414	542	362	1260
s_35396	RPLP2	724	588	723	1004	731	705	647	582
s_41973	PLAG1	489	454	430	618	487	682	875	779
s_32803	LYZL1	1093	931	863	1284	993	1163	1022	1005
s_9784	TMEM177	593	722	456	502	588	520	627	214
s_2826	BAZ2B	356	576	452	433	432	442	585	409
s_16248	DDX1	751	667	461	1128	1067	1133	829	838
s_11408	EDEM3	447	214	224	268	615	565	444	680
s_27668	ZNF37A	659	480	601	1058	544	490	512	555
s_16203	PRKAG2	645	590	700	1011	751	893	971	680
s_25429	GAGE10	491	409	285	483	640	457	574	388
s_17072	C1orf21	684	275	797	531	785	647	1093	608
s_35259	IRS2	709	801	687	985	753	951	838	806
s_34331	H6PD	572	575	515	621	727	800	755	480
s_52428	INO80D	1059	496	192	558	1088	1414	548	747
s_20453	MUC21	283	122	226	334	375	211	176	429
s_2996	LBX1	338	183	190	101	262	310	295	234
s_9744	DENND4B	1030	945	1185	853	1127	1155	1326	1017
s_53042	TMX4	584	476	384	291	993	860	552	638
s_34664	ZNF696	449	506	914	612	592	721	687	624
s_48912	SULT1A2	225	209	189	377	366	402	437	367
s_12378	ALCAM	479	797	418	282	592	633	367	339
s_27108	PRAMEF27	623	810	852	1064	659	829	767	795
s_2141	ZNF735	466	180	314	272	396	686	379	441
s_40835	KYAT3	1254	4313	3737	6433	1126	2302	1720	2431
s_18621	TXN	584	571	600	569	547	818	756	315
s_24342	THYN1	520	595	321	196	578	696	502	576
s_14638	TGM3	275	403	214	421	386	293	457	383
s_1939	RPL31	389	174	129	313	400	379	316	311
s_54859	TMEM207	280	439	393	462	578	644	697	609
s_15705	FEZF2	909	927	580	751	515	893	637	578
s_37645	FUZ	224	77	173	452	208	197	160	203
s_46004	CFAP126	283	292	253	179	269	244	219	315
s_30421	SEM1	786	745	727	872	755	833	591	763
s_52359	TRPM8	970	952	1052	1203	954	939	971	925
s_46408	MRGPRX1	858	725	698	1083	775	998	1232	822
s_9493	PRIM1	768	692	680	618	793	1105	859	762
s_20738	LMX1A	269	469	248	425	293	361	293	282
s_22959	THRA	459	319	627	234	528	365	426	213
s_46629	CCDC140	678	679	789	972	776	982	866	587
s_45581	CD300LG	452	332	151	600	658	447	287	404
s_26695	ZNF208	511	362	261	369	335	353	287	563
s_43619	USP17L10	360	494	342	318	413	525	431	378
s_42581	EIF3CL	596	1311	1034	1317	782	1022	748	857
s_47653	GAS2	572	228	309	352	428	352	438	454
s_30733	PPARGC1B	691	779	812	740	872	759	801	983
s_2720	GPX3	870	685	517	506	899	1112	978	892
s_23179	PCGF2	389	349	373	303	385	386	487	383
s_14479	CACNG1	444	504	421	758	509	721	561	735
s_30717	SCLY	626	626	515	472	574	707	796	460
s_41517	CEP170	761	596	645	532	590	762	881	424
s_27352	SASH3	749	756	499	755	702	700	634	840
s_20360	MREG	242	294	290	355	377	399	322	211
s_8092	NPC2	593	565	554	511	553	586	535	389
s_45150	FIGN	942	609	581	987	904	911	860	889
s_17166	ARL4A	588	640	719	434	721	703	835	565
s_20025	WIPF1	513	751	561	740	660	796	617	868
s_39559	TMEM99	551	412	522	381	746	583	699	371
s_12626	RGPD5	1297	1532	1162	1342	1267	1840	1778	1768
s_47425	ARTN	745	531	793	717	875	619	799	828
s_54728	SAMD7	372	517	300	220	399	293	474	367
s_30879	FMN1	494	442	423	600	448	535	533	335
s_9596	SGIP1	351	250	390	203	321	475	274	172
s_22589	GRIN2D	1053	812	842	723	1054	1414	933	1317
s_12674	SOX4	570	677	532	902	804	775	788	1196
s_38003	CSF2RB	305	415	270	235	362	332	276	450
s_20595	PALLD	216	244	104	173	225	205	265	334
s_6217	KAT6B	879	876	719	772	872	1023	867	950
s_30611	NFIC	513	540	375	592	863	708	740	854
s_53600	FPGS	874	677	605	560	1041	1295	857	698
s_9634	OR51G1	372	306	243	231	340	369	400	337
s_17177	FAM206A	503	240	360	361	466	378	356	180
s_52028	PAK5	563	681	495	683	810	943	477	576
s_35520	PEX11G	549	549	427	722	620	370	578	325
s_1715	PTH	820	903	917	1154	905	1359	1082	1249
s_40547	FNBP1L	335	419	386	320	540	548	562	352
s_24227	LRCOL1	1141	1119	748	990	1176	1500	1202	1270
s_28459	CRYBB1	730	356	531	795	838	746	867	780
s_24335	ITM2A	311	591	314	491	507	519	253	626
s_17726	PRDM9	522	645	535	596	748	818	776	903
s_12356	LIPM	367	358	401	325	387	397	469	361
s_11668	EYA3	528	252	275	423	591	452	466	493
s_31485	NLRP10	704	633	591	1369	617	728	672	282
s_2132	BEST4	398	73	153	120	552	275	308	466
s_29050	LIG4	500	386	521	790	614	587	663	431
s_17893	TNRC6C	1076	986	750	1303	983	976	958	1177
s_8534	TMEM39B	620	386	586	416	795	1118	693	685
s_27375	PSAP	346	456	269	365	713	644	461	703
s_21801	C15orf41	419	442	501	484	574	716	496	475
s_54185	MRPS26	446	635	500	496	566	530	552	439
s_6842	TMEM35B	756	802	950	1035	1029	977	847	899
s_33657	KLF12	252	46	284	225	374	516	449	425
s_29253	SH2D3C	798	1123	1089	1054	789	946	1268	763
s_17109	PLEKHO2	838	1126	1529	1163	810	1091	813	754
s_27629	STARD4	802	898	850	974	919	949	860	746
s_11803	IL31RA	688	979	764	591	755	744	709	430
s_347	CRY1	299	378	297	277	271	332	477	211
s_28802	TCHHL1	847	337	272	768	715	960	685	994
s_44908	NO-TARGET	863	1071	794	878	862	884	994	514
s_17644	GIPC1	389	314	256	388	357	321	365	263
s_86	DBR1	508	272	322	202	396	450	365	461
s_687	RARRES3	466	515	481	809	389	608	453	483
s_15801	C4orf36	642	821	418	590	857	820	723	594
s_36989	AVP	229	72	86	217	492	424	406	469
s_36770	ZG16B	470	483	486	794	782	851	562	668
s_968	DDX4	742	560	565	584	781	787	852	875
s_21779	POU3F1	511	572	519	458	486	467	598	377
s_4394	ADAMTS4	796	689	720	1275	911	901	881	808
s_10094	NXPH1	787	569	627	805	727	802	705	581
s_28117	MAP3K15	705	1599	1255	1377	761	1387	1026	836
s_28594	PAQR5	616	486	394	431	696	585	624	416
s_28146	ZNF658	614	274	530	369	522	539	636	537
s_29793	PTGDR	710	689	676	933	847	904	940	1079
s_23686	PPM1H	315	328	459	639	393	572	395	494
s_46402	TUBGCP4	886	858	569	1087	1195	1076	409	828
s_1390	PRMT9	801	795	629	701	846	750	850	625
s_36048	DAW1	637	704	692	1201	877	891	837	734
s_38863	WNT9B	299	234	215	286	498	451	188	289
s_41113	FTH1	907	647	699	1196	893	1376	1389	972
s_30952	DDX42	652	856	641	1153	790	776	813	849
s_5571	ADAMTS13	577	612	470	821	700	810	698	369
s_42685	PRSS38	555	729	505	693	584	686	703	529
s_39579	FAM96A	898	1049	930	1163	1001	1191	1243	870
s_46439	GABRR3	515	466	424	1103	610	674	694	446
s_21897	BABAM2	395	477	577	497	712	1131	745	914
s_20119	DCDC2B	600	276	304	450	465	616	611	414
s_25084	UGP2	789	877	649	678	704	923	795	916
s_29296	PGAM5	954	718	853	1025	1065	952	737	535
s_50547	AFF4	814	964	922	885	670	687	749	583
s_36654	RAB7B	618	592	606	1274	611	788	462	573
s_54284	RHOJ	348	383	507	531	439	308	360	283
s_34212	LOC100130370	329	448	348	275	350	519	429	524
s_12788	NR1H2	538	398	534	686	559	712	786	523
s_50128	RABEP2	603	627	585	593	692	782	684	560
s_15164	GPRC5A	420	270	536	438	432	466	505	357
s_5521	NAP1L1	716	510	252	510	1070	894	462	977
s_52289	MT1E	731	421	212	334	783	571	535	769
s_29572	CRABP2	569	160	163	99	878	882	504	1097
s_48402	DYDC2	364	319	396	317	425	450	472	387
s_15289	WRAP53	630	642	485	584	682	636	501	1273
s_27691	FICD	463	703	580	468	646	899	756	845
s_34625	ZNF616	446	630	416	418	575	516	505	354
s_11009	SGIP1	870	626	883	909	1035	919	1227	1024
s_50424	HIST1H2BI	613	620	545	436	601	805	573	657
s_2509	SPATA18	987	706	1043	998	1290	1234	1031	1051
s_30951	LRRD1	804	674	533	504	711	780	723	656
s_54786	TPO	202	125	234	231	297	212	213	170
s_27344	LGALS3	736	613	430	662	953	804	468	568
s_1496	TMEM189-UBE2V1	485	427	319	529	590	498	470	514
s_56290	WFIKKN2	496	550	489	1011	455	484	554	569
s_49183	ADAM19	311	265	388	335	382	370	386	283
s_40165	IRS2	434	687	371	457	513	611	429	347
s_43518	C8orf34	302	342	405	309	314	272	329	312
s_29560	DCBLD2	956	755	763	695	856	916	1079	756
s_14997	RFX8	418	208	373	323	568	375	450	574
s_39552	IQSEC3	471	582	402	713	571	822	604	618
s_22505	PGM2	854	712	431	684	824	637	824	479
s_1285	NTN1	570	466	597	426	897	1036	1014	864
s_43709	PDSS1	438	486	402	265	378	410	461	348
s_47804	LEF1	384	488	475	400	327	377	381	157
s_15141	TATDN1	605	932	569	861	803	599	649	537
s_27040	OR4C3	644	421	530	1254	727	782	565	748
s_28156	KLHL20	541	549	566	578	617	620	690	747
s_27880	LOC650293	674	715	483	470	563	519	579	509
s_46861	STAM	577	649	555	584	474	554	605	454
s_11909	PRR3	368	373	319	474	562	397	350	229
s_42132	ZNF709	466	521	473	578	558	433	636	504
s_20438	ADNP2	427	410	475	453	495	642	457	238
s_1878	DSCC1	760	709	879	820	707	898	830	581
s_33098	IKBIP	1039	630	457	513	816	1072	520	889
s_34705	TSPYL5	601	587	551	629	638	1006	636	686
s_6696	P3H4	1014	950	795	617	830	1024	837	1002
s_51482	CMTM1	438	345	533	253	405	333	612	302
s_13127	ZNHIT1	1039	1248	1063	888	1074	1068	1191	960
s_19940	TAOK2	366	175	226	378	622	259	239	255
s_18055	RRM2	579	611	688	454	714	461	719	760
s_1720	HEXIM1	667	467	341	330	562	595	261	459
s_11248	ARL14EP	579	815	754	710	693	682	895	610
s_55613	GPR34	802	830	1069	1029	711	940	1091	834
s_19876	PPP1R9B	630	758	472	434	743	951	816	511
s_46653	HLA-DQA1	862	718	714	621	797	987	827	578
s_34042	RELL1	483	766	619	656	539	637	643	659
s_32859	CNGB3	827	656	664	621	705	913	829	670
s_10054	PPCDC	612	395	487	385	433	463	305	368
s_36503	OR51A4	904	351	481	805	568	491	510	606
s_28138	SYNGR4	404	219	340	437	436	432	595	235
s_45535	BBS2	644	442	641	755	752	793	668	681
s_35406	SLC7A1	674	784	673	374	747	783	829	915
s_38717	CTNND2	1021	877	1063	989	825	1028	1127	897
s_6531	IFNA10	629	439	377	581	474	593	501	498
s_44941	CSAG1	478	570	429	687	511	815	498	385
s_41840	LY75-CD302	610	566	663	787	498	719	618	476
s_44063	MMACHC	580	502	415	409	654	630	547	594
s_16420	S1PR5	693	991	890	640	917	735	897	911
s_45680	TSNAX	618	811	637	608	638	804	641	500
s_12747	C20orf144	772	557	632	698	929	822	837	795
s_7310	SPANXA2	807	808	712	915	1017	855	1038	648
s_47217	OR4A5	664	862	719	1067	886	905	823	401
s_487	ELAC1	715	691	620	722	650	766	645	422
s_46713	ASCL4	484	838	547	703	566	651	449	446
s_11120	NUP93	408	348	406	298	317	294	362	131
s_25142	STK24	428	314	312	416	490	617	483	321
s_16221	MUC5AC	494	559	412	664	504	596	614	285
s_29400	CD93	1044	1191	1214	1291	1180	1647	1658	1555
s_33851	PARK7	780	440	576	942	781	744	693	684
s_22608	KANSL2	704	714	756	716	694	810	734	506
s_33850	SENP6	584	404	595	740	745	607	893	1317
s_56478	USP26	370	349	294	177	450	443	406	504
s_4348	HELZ	356	474	447	555	760	643	598	782
s_46039	DDX41	273	261	221	416	302	327	305	533
s_51328	DYTN	698	704	771	743	838	1433	948	729
s_10426	CTRB2	596	432	530	657	661	766	647	741
s_44493	PLA2G16	467	360	479	440	464	549	539	520
s_20274	SP8	429	1097	1327	1212	422	394	290	235
s_46225	MIA2	366	294	343	573	333	311	351	195
s_44566	DNAAF2	443	910	508	1182	666	827	784	778
s_36588	LRTM1	453	440	406	304	597	540	596	431
s_52440	KCNH5	853	349	729	838	857	870	869	456
s_33323	MYCBP2	402	291	826	530	687	754	906	466
s_53640	THSD7B	713	859	865	701	796	749	1027	485
s_28115	RSL24D1	465	760	426	656	594	850	549	707
s_42950	OR6F1	407	606	422	197	382	587	450	340
s_11115	TOP2A	802	815	905	969	915	929	1018	754
s_11251	MCM3	657	616	662	664	834	827	725	695
s_10977	C1QTNF3	1445	1771	1362	1606	1266	1451	1316	1319
s_24464	CHRNA6	609	759	772	502	701	932	1088	731
s_8618	NANOS3	377	474	557	556	450	780	612	394
s_40876	HABP2	961	875	1192	1015	905	1275	1485	1146
s_16856	C5orf24	724	941	795	901	809	1129	809	537
s_11716	SPTSSB	514	385	343	684	364	647	427	391
s_29697	TPGS1	563	691	751	736	677	709	637	600
s_8612	BEST4	112	5	8	11	235	59	78	57
s_26336	TEX46	401	270	422	403	291	335	803	231
s_17273	PODXL	441	256	209	537	453	335	224	361
s_29027	PENK	582	307	297	422	626	582	575	339
s_18902	EIF5B	441	607	350	535	544	504	419	807
s_35401	GSTM2	817	948	644	1667	861	740	728	908
s_35515	GSKIP	587	528	420	711	777	881	778	760
s_28355	RDH16	654	740	480	612	538	623	551	451
s_56123	FAM71E1	501	278	1449	670	634	513	1628	664
s_15332	MLF2	240	345	253	386	359	351	356	465
s_51652	RD3	612	529	376	630	643	590	578	686
s_27873	EEF1G	729	344	557	712	523	913	858	498
s_49338	ATP8B1	393	419	330	573	307	376	218	359
s_44612	SOCS1	565	466	498	504	763	701	1040	760
s_27768	OR4L1	194	162	278	149	210	447	287	261
s_52213	XRCC5	745	701	681	742	830	703	1061	917
s_12944	MTPN	818	651	368	802	932	1244	657	1116
s_9238	RAB2A	436	356	492	362	572	827	603	437
s_19854	RRP12	271	415	383	572	442	549	539	359
s_30368	OR51B5	472	437	350	533	494	544	599	488
s_48276	RPL14	759	883	718	805	970	1013	860	1070
s_16411	PAQR6	724	1047	678	1337	923	879	877	735
s_26810	C8orf76	495	480	412	351	532	564	529	338
s_48514	FCGBP	604	687	514	574	580	627	667	594
s_15780	GNAT1	597	605	703	526	731	723	833	583
s_44682	MED14	640	558	492	544	653	692	614	586
s_16098	TKTL1	176	318	227	446	263	362	264	355
s_26723	SUPT3H	266	423	335	405	328	442	390	465
s_4827	EVA1A	520	471	678	580	508	641	743	599
s_23312	SMYD2	575	486	605	408	781	818	813	674
s_53352	HCN4	383	338	279	458	614	485	360	1029
s_639	CKB	269	334	712	695	528	498	782	545
s_18185	FGFR1OP	1171	938	1062	1190	1161	1313	1118	1200
s_1399	L3MBTL1	830	1111	951	1213	1020	1243	1328	888
s_24737	POU6F2	1310	1065	1232	1348	1534	1507	1442	1308
s_45613	PIK3C2B	266	436	381	346	386	539	549	481
s_42200	GTF2H5	426	481	394	175	480	477	487	522
s_53963	CWC25	595	644	703	694	798	783	964	471
s_35996	ZNF701	966	1287	1277	1436	975	1055	1325	1037
s_47434	ERVFRD-1	544	732	406	533	664	699	543	732
s_29794	DHX32	603	661	597	613	713	626	651	456
s_55560	N4BP2L2	591	945	594	566	657	972	993	627
s_46543	RGS21	355	498	402	591	457	685	483	522
s_27190	BTN2A1	594	622	531	538	579	650	553	487
s_35864	PEX12	692	1312	522	1498	708	862	502	529
s_3004	TMEM208	375	497	410	585	440	367	347	388
s_31264	NUFIP1	388	638	525	730	519	548	541	509
s_49812	POLD3	677	617	776	980	703	620	688	616
s_42366	DEFB128	571	623	468	796	689	692	535	592
s_51684	UBE2Z	1210	1075	1410	1441	1166	1218	1555	1410
s_13096	IFT57	928	875	1227	1158	858	1032	1155	706
s_52453	CCDC71L	1173	883	870	1218	1241	1097	1236	1028
s_31194	GOLGA2	502	240	396	404	567	839	621	468
s_43651	NARS	517	284	424	554	576	736	617	430
s_18737	C14orf79	676	496	754	752	562	693	738	256
s_29207	MAP6D1	418	433	568	370	394	457	441	266
s_35245	SPG20	692	600	657	931	841	681	832	485
s_18595	SYNC	843	703	684	1078	920	1584	960	828
s_52473	EFCAB8	361	505	405	444	516	544	465	636
s_29335	TEAD1	491	270	420	552	586	757	764	563
s_15460	SEC61A2	449	336	377	718	494	594	598	345
s_17326	SLC45A4	800	236	384	365	951	353	355	309
s_44310	USP6	716	884	937	538	772	1100	852	617
s_41135	TMEM163	1220	1254	995	858	1404	1364	1531	1063
s_33691	ELK1	707	764	956	864	553	746	570	288
s_25572	TRIM37	502	427	225	545	454	432	312	429
s_15214	TIMM23	725	842	661	815	803	761	777	719
s_47569	LLPH	793	583	624	954	799	784	725	554
s_47578	GCNA	793	508	678	501	970	892	802	766
s_20368	EIF2D	371	366	354	460	470	649	440	439
s_1243	MATN4	696	450	670	969	675	781	636	772
s_11333	HBS1L	938	770	974	892	1011	1043	997	1336
s_28437	SARS	1073	1275	1464	1093	1168	1276	1183	902
s_19799	LOC283357	395	495	589	703	608	823	660	569
s_7522	ZNF84	424	549	612	626	638	917	627	639
s_38435	TRIM24	768	569	688	649	881	804	1116	686
s_13220	PDLIM7	312	413	276	195	310	604	342	326
s_9075	DLGAP3	504	297	688	903	704	307	338	528
s_38957	SLC13A2	571	533	779	682	929	838	1089	849
s_13761	C2	378	468	401	374	393	599	370	333
s_46751	MYL7	677	1015	718	676	807	916	902	781
s_34962	ESYT3	577	518	480	720	882	788	738	587
s_28863	ZNF559-ZNF177	146	94	73	164	379	340	337	417
s_46793	RHOXF2B	1357	1942	1725	2025	1758	2128	1986	2125
s_36398	NBEAL1	499	502	275	493	515	437	300	348
s_6434	NIPSNAP3A	1068	1098	818	1063	1100	1089	1015	682
s_13597	BBOX1	699	795	645	915	720	679	664	738
s_30473	LOC284108	563	313	262	374	636	636	539	565
s_52995	GLDN	606	522	551	621	675	557	661	285
s_11086	MOCS3	298	331	280	425	408	449	371	404
s_44422	DBX2	653	321	267	274	695	791	668	650
s_24174	EIF4EBP2	427	540	505	817	505	683	625	590
s_31366	KRTDAP	162	38	237	100	258	141	200	174
s_14624	DHRS7C	572	358	685	590	627	709	702	405
s_53057	MS4A5	374	418	402	490	451	602	538	270
s_30128	C12orf54	506	419	548	409	682	772	577	482
s_22964	TAF4	226	160	126	123	271	281	198	252
s_31418	C15orf59	339	411	280	490	330	462	304	309
s_15132	WNT6	468	329	334	710	634	716	542	710
s_38624	CFAP69	1078	1107	1029	911	1463	1790	1459	1457
s_4782	WDR1	713	440	556	389	600	664	575	777
s_18221	GLT1D1	720	456	668	507	694	834	630	491
s_21244	LATS1	197	36	58	149	303	336	213	395
s_48990	PELI1	439	206	394	698	504	633	516	447
s_34291	LONRF2	411	615	495	437	595	529	529	408
s_27064	LOC157562	598	472	367	259	555	498	525	585
s_29518	CUL2	872	1050	1095	709	1062	1004	1337	949
s_25696	C1QBP	521	491	426	414	503	262	278	182
s_45748	GPR22	322	239	240	242	279	286	204	188
s_32483	SURF2	479	585	615	628	630	565	719	547
s_32996	LCOR	724	886	1339	1714	800	344	403	253
s_41329	PC	831	890	717	789	948	1120	1011	922
s_39505	TCEANC2	535	520	411	829	578	609	389	966
s_52966	TKFC	993	1386	1369	1704	1057	1090	926	1095
s_35806	SH3RF3	390	224	460	282	633	470	407	504
s_23331	DOCK1	297	90	106	211	359	237	222	108
s_23344	ADAM22	773	560	877	688	724	1043	837	881
s_25282	CFAP46	386	184	196	332	311	404	286	227
s_36165	LYAR	490	287	153	452	575	701	506	468
s_1437	FGFR1OP2	535	582	385	324	636	597	765	432
s_51449	EXOC8	801	575	420	592	750	1064	797	542
s_19911	LRRC4B	603	603	851	692	613	781	828	679
s_7676	VPS37A	531	537	479	896	657	563	620	441
s_37928	LRRC55	398	290	455	348	544	648	488	566
s_25068	GEMIN8	810	862	761	920	955	1054	833	518
s_7656	ADSL	464	764	346	383	358	518	330	501
s_2266	FLRT3	643	668	389	812	581	690	573	723
s_2710	C14orf105	376	295	343	450	485	560	316	417
s_20075	VGLL4	336	526	286	270	517	586	553	385
s_17345	NAB1	643	962	545	862	864	955	926	410
s_5852	CFB	403	421	303	324	471	529	413	356
s_21209	STARD10	503	189	463	650	361	510	359	449
s_31380	CLDN7	560	758	563	634	746	692	760	652
s_38948	NKX2-8	839	680	814	661	823	1084	684	927
s_22283	CDC14B	752	956	885	1043	774	670	533	652
s_29623	PKN3	921	586	865	1031	989	1184	1477	1140
s_12802	PGAM5	675	407	594	374	627	567	559	522
s_204	ARR3	409	503	583	389	374	464	419	367
s_45328	BBX	675	757	676	551	770	891	865	588
s_19409	ALDH1B1	433	423	474	368	506	507	484	403
s_23206	RAB25	391	411	348	308	524	705	616	395
s_10706	DSPP	516	401	404	495	673	639	652	795
s_10355	LIPN	504	696	463	667	466	636	479	630
s_27069	ASCL3	673	841	509	667	736	650	778	679
s_40994	CYP2B6	863	829	664	894	936	1266	945	526
s_8103	SPSB4	373	400	509	326	567	479	455	424
s_6253	GRAP	566	465	342	617	975	1065	499	619
s_23758	ITPKC	526	519	351	685	531	733	670	482
s_52903	KRT74	890	608	296	307	907	662	457	884
s_6276	ADH7	1188	914	788	953	938	1222	962	947
s_12205	TRMT1L	525	524	433	456	480	709	515	280
s_49641	PCDHB3	390	505	305	257	214	240	310	314
s_18560	PCIF1	797	1070	558	1033	1091	1106	1205	803
s_28460	CD6	837	927	846	915	900	877	1047	786
s_56241	CCDC74B	757	401	536	435	711	746	990	842
s_9670	WDR55	681	1000	636	522	662	712	747	303
s_1239	RBM38	513	210	1285	851	861	669	1344	717
s_54709	BTBD11	565	309	330	402	466	656	470	611
s_25791	OXTR	376	564	383	450	421	722	621	480
s_47521	GPBAR1	430	313	241	266	600	828	940	981
s_25277	SLC9A3R2	443	416	322	376	542	434	455	223
s_40238	JAZF1	566	358	537	425	741	704	757	406
s_34772	RBM5	466	670	571	752	491	718	746	1103
s_32879	RAB42	429	122	132	439	421	520	271	865
s_39246	TARP	677	487	742	754	590	638	700	627
s_730	TCN2	814	1011	774	1012	879	1011	1058	704
s_40968	PPP1R1B	710	606	485	619	665	971	613	681
s_7705	RBM12B	835	769	636	576	699	667	677	562
s_3098	NEK10	652	695	675	710	765	828	610	622
s_3511	GPRC5A	214	76	264	141	255	336	377	275
s_36952	PAIP2B	419	64	143	291	577	326	304	493
s_16268	MPL	732	860	1038	1133	926	884	864	857
s_26608	WWTR1	680	858	860	1187	601	856	790	526
s_36130	MCRIP2	625	357	599	496	669	885	841	843
s_33050	MCM9	660	571	799	855	898	850	809	681
s_3557	COL4A3	726	593	561	853	927	673	687	825
s_53104	ASXL3	526	667	669	730	731	800	534	453
s_18170	SCARF2	814	451	565	744	576	579	656	395
s_47693	OR6P1	811	811	500	694	865	854	812	474
s_20440	LTC4S	476	550	447	645	694	968	540	962
s_55445	LOC105377134	836	1052	824	921	972	1060	1016	1173
s_18074	ZNF260	384	538	607	530	576	780	613	481
s_44232	TRAF1	588	906	616	1338	846	910	733	979
s_6398	HIST1H4A	557	825	551	851	547	786	588	548
s_51808	NOMO3	550	746	335	631	431	601	538	477
s_46112	RFC4	485	618	399	391	665	645	690	749
s_12051	NFKBIB	712	655	680	727	863	887	910	827
s_34910	ATP6V1F	306	359	319	314	512	507	309	548
s_40218	GNB4	539	839	828	1137	629	950	749	626
s_17499	SLC25A27	580	818	688	931	786	953	739	493
s_22741	ENO2	522	526	545	774	557	572	710	323
s_19827	FANCL	405	336	492	607	579	479	650	490
s_41001	SLC9B2	492	738	617	404	523	526	668	567
s_22813	FRA10AC1	623	652	427	764	472	845	607	506
s_36391	TEX43	365	572	349	338	302	332	334	391
s_46025	CFAP44	405	514	571	827	668	596	630	320
s_56137	DGAT2	684	417	284	647	577	668	574	361
s_18606	KIF14	492	419	336	481	569	476	467	276
s_53453	TRPV2	476	480	396	529	652	803	408	480
s_10232	PRAMEF17	580	837	543	693	711	568	776	727
s_11197	POLR1A	458	787	651	728	583	824	559	612
s_48840	SLC16A6	410	480	545	688	472	367	391	347
s_25270	NRIP1	282	315	352	553	488	557	465	667
s_48664	NODAL	271	272	244	253	275	227	283	181
s_29265	SERP1	930	966	630	942	932	1036	949	1093
s_55617	MYL7	943	708	783	1155	815	1051	1014	595
s_918	SWT1	469	681	472	440	602	472	631	1074
s_33335	FZD9	540	682	731	887	707	497	932	510
s_29043	FNBP1	327	354	304	346	563	395	398	336
s_41265	ABCB1	980	643	8357	561	1331	1131	8263	1637
s_16357	SLC2A4	369	561	419	320	469	462	409	443
s_18049	ZNF627	723	728	837	498	845	839	889	688
s_33410	FAXC	666	569	717	978	768	756	798	819
s_25942	OR4S1	446	430	424	283	410	430	448	298
s_18998	IRS4	686	3162	2203	5354	792	1822	1222	2232
s_13028	SPIN2B	743	444	850	838	820	1048	1010	1399
s_19451	LDB3	839	796	979	1102	906	985	1311	1054
s_40465	TMEM164	536	500	338	370	605	573	611	354
s_4936	MUS81	970	1132	915	1066	794	1027	956	904
s_7561	PWP1	609	576	401	685	542	649	657	651
s_8289	PFN2	371	639	484	342	573	601	642	573
s_18110	KIF4A	832	515	789	538	763	969	1107	1102
s_5126	BRDT	612	477	580	918	691	856	818	965
s_47220	ANXA6	760	730	747	730	920	1013	979	768
s_50625	LEFTY1	579	295	476	602	598	726	611	509
s_49472	NTPCR	357	548	394	535	327	353	411	374
s_51563	ZNF433	515	589	310	512	488	633	418	656
s_53278	PTK6	800	873	528	580	872	783	772	797
s_47228	MOGAT2	682	796	667	700	675	846	620	766
s_3736	ZG16B	1129	735	762	1120	858	1079	1006	634
s_38438	CAMK4	1052	733	953	1056	1058	1070	1188	1143
s_3159	NSMCE1	357	367	428	465	535	645	543	469
s_41295	RSPH1	974	1097	975	1112	1030	1182	1254	1294
s_1055	ZBED2	582	276	487	485	554	558	549	596
s_53702	NOC2L	571	813	609	634	681	918	645	815
s_51794	ZNF645	781	1040	730	676	1019	963	1016	686
s_27267	TEAD2	854	802	702	823	698	881	911	713
s_50747	BCL2L15	205	87	148	240	285	241	177	151
s_35634	MATN3	712	762	648	569	735	608	726	763
s_20244	MLLT3	378	297	303	261	487	402	345	388
s_32412	SLC9A1	453	461	325	348	503	675	438	355
s_39682	CD99L2	572	216	200	307	631	639	233	467
s_6803	PIP5KL1	714	836	764	866	903	1489	1048	824
s_35786	MAZ	469	540	431	701	800	734	411	373
s_24453	TSSC4	898	493	674	1310	838	800	882	866
s_15011	DCAF10	444	210	370	539	533	505	432	298
s_11366	CLOCK	632	574	946	674	701	790	767	525
s_35644	TAOK2	111	125	163	355	370	86	33	196
s_52839	MET	960	1539	1127	1491	1120	1445	1199	903
s_41480	TMEM250	750	628	611	639	782	852	879	421
s_40423	AHCTF1	723	775	540	696	933	931	634	738
s_38087	SSX1	601	468	826	753	585	690	685	542
s_7186	CFAP70	717	762	446	524	599	727	593	392
s_51442	EML3	585	607	278	387	722	381	410	691
s_31853	PIH1D2	304	81	425	200	423	271	300	414
s_50337	TNFRSF17	683	640	520	544	667	789	672	447
s_49943	PAK6	512	517	429	643	620	655	475	515
s_5822	PTPRE	627	863	778	1265	678	807	882	540
s_8778	ZBTB2	515	244	227	258	656	344	379	580
s_10276	MSMP	522	474	447	533	688	667	678	616
s_7768	COLCA2	678	325	464	324	735	788	809	1195
s_6182	WDR12	763	737	779	674	794	935	782	643
s_42327	OGFOD2	292	244	439	226	233	337	221	309
s_39366	FEZF1	520	439	858	560	698	632	630	428
s_13577	GPN2	459	455	312	428	587	672	622	403
s_1328	AMDHD1	568	461	414	281	323	491	496	314
s_16434	MARCH8	743	802	834	1175	1098	753	1014	832
s_33333	HILPDA	318	355	433	462	465	640	452	669
s_28082	LOC100129216	275	538	373	739	385	473	307	376
s_55692	ADGRE1	490	478	605	663	468	617	664	502
s_21776	MAP1LC3B	730	810	435	663	634	599	646	638
s_5596	FITM1	708	648	700	666	940	989	1104	622
s_47422	CGB5	325	118	155	335	555	706	426	674
s_37019	GRPR	514	865	288	614	698	867	785	529
s_44240	TNP1	569	542	321	485	458	453	422	539
s_42541	ALAS2	440	765	757	760	687	744	632	674
s_2802	UGT2A1	583	454	332	414	571	555	446	587
s_31453	G6PC2	385	489	392	508	463	456	396	300
s_8580	AKR1C3	378	392	461	485	451	593	410	738
s_24809	MCTP1	621	606	602	791	533	533	571	505
s_46969	SLAMF7	560	592	504	546	664	864	734	717
s_16291	DNAJC7	638	712	619	691	845	818	870	653
s_28019	CDNF	368	370	392	666	497	452	466	449
s_17001	PNPLA7	423	759	507	640	513	674	871	379
s_56578	KLRC4	284	296	265	153	210	250	296	353
s_27707	KDELC2	574	395	474	478	471	531	544	294
s_29619	GGT2	329	177	150	129	397	747	173	494
s_53536	PNMA8A	900	891	878	908	1062	1044	1046	1117
s_37194	STIP1	597	476	501	648	506	629	471	623
s_30646	NEK1	682	518	382	705	555	579	515	675
s_53987	OXSR1	641	1510	1913	1625	566	1079	1532	826
s_15567	C5orf67	289	331	148	239	357	369	228	239
s_40740	DMXL2	278	136	450	303	451	307	557	365
s_11673	MSH4	633	979	949	720	789	907	821	821
s_45879	CLECL1	276	252	244	537	372	430	283	308
s_7902	HCFC1	857	533	917	806	944	982	1085	1447
s_5101	NEU4	693	1208	578	1181	1004	1349	851	1340
s_28084	ADGRL2	344	376	377	501	309	333	315	324
s_43060	MYPOP	402	340	316	571	266	158	204	225
s_47250	PLA2G10	672	782	552	577	982	908	886	992
s_49599	CAMSAP3	602	264	114	225	972	648	297	588
s_48216	FBXO11	379	337	340	266	351	536	505	418
s_53532	ZNF341	540	271	503	391	566	640	525	582
s_21055	PA2G4	423	543	507	534	592	411	237	424
s_43114	SLC2A13	360	294	376	338	447	750	495	337
s_3395	VCX2	402	145	152	146	355	389	356	337
s_22381	PAPSS2	402	348	228	161	562	948	750	955
s_34885	SORCS1	666	1046	614	1104	672	666	870	382
s_50065	TBCE	288	259	324	557	436	532	303	443
s_25411	PDP2	229	508	366	618	373	299	445	239
s_52964	CILP	679	946	586	752	574	740	512	638
s_19025	LETM1	713	630	430	462	585	702	552	737
s_43886	FLOT2	400	336	221	373	503	431	372	912
s_55491	ZNF98	988	876	851	765	977	1063	895	907
s_10287	NPFFR2	810	986	560	667	822	781	1067	690
s_23356	CHST12	713	701	808	709	678	798	702	520
s_47733	OR5AR1	212	307	314	325	403	391	257	364
s_49249	ERBB3	265	92	48	161	433	230	235	147
s_27094	KLKB1	654	535	485	624	632	722	688	365
s_29329	TPM4	532	456	195	478	593	513	290	442
s_11155	KRT15	646	638	731	871	714	843	776	1002
s_36749	NOS1AP	592	1191	831	784	616	1499	609	563
s_17231	WNT10A	382	605	472	599	657	537	445	514
s_51265	HTR3D	755	734	452	526	797	1056	842	1061
s_17247	OR51V1	443	295	304	504	425	452	900	278
s_44540	FAM9A	621	197	79	372	678	715	416	880
s_2159	C3orf62	608	526	562	646	861	898	529	441
s_19958	TMEM5	515	709	383	578	468	721	580	421
s_1555	CCPG1	707	600	431	540	567	878	546	805
s_32941	TMEM168	849	916	716	858	853	781	770	824
s_20615	KCNJ8	373	420	263	369	420	486	393	452
s_29624	TEX26	516	570	1089	1101	734	837	874	604
s_36022	SLC2A8	887	821	838	819	900	827	980	742
s_11856	FBXW7	975	939	953	842	1084	1737	1245	1039
s_39169	OR4F16	461	347	276	339	496	536	280	206
s_8800	CHRNA5	291	222	363	342	337	323	358	303
s_30776	NXNL1	426	293	251	383	565	642	456	457
s_6801	ARF6	484	551	394	587	523	348	462	533
s_49954	RPL22L1	376	449	328	522	348	552	398	364
s_47614	FAM71C	368	321	364	593	511	578	487	581
s_50521	OBSCN	919	698	886	665	819	1065	1055	972
s_32395	DNM1L	98	59	61	44	300	230	119	257
s_28072	PRR20B	417	460	386	662	544	733	513	355
s_6271	ZYX	580	488	538	399	679	457	648	258
s_48426	RALBP1	709	344	519	526	552	654	722	559
s_53663	MUC3B	584	700	528	601	598	719	866	597
s_36079	SOCS6	741	437	537	578	842	401	507	611
s_53056	ILF2	727	553	609	730	518	632	724	688
s_47577	USP4	271	116	120	300	571	447	410	445
s_541	OR6Q1	584	525	328	292	547	548	643	280
s_21436	NKAIN4	728	384	617	788	665	677	677	521
s_44312	ADCYAP1	622	999	956	923	827	1120	879	911
s_14367	CDK6	735	977	876	1589	584	505	444	412
s_39922	AMIGO2	476	313	225	359	449	526	384	570
s_52204	FUT11	870	1009	994	1195	968	1236	1051	1254
s_6516	OASL	804	795	623	930	625	805	778	816
s_16377	ADCY9	723	573	1015	733	685	900	1302	797
s_29287	METAP2	1171	1045	1018	915	1321	1258	1569	1184
s_14154	VCAM1	292	364	269	94	464	743	549	237
s_26263	CEL	552	538	465	622	628	511	692	551
s_54209	STK16	459	569	319	521	516	635	545	552
s_26410	SLITRK3	549	511	607	749	644	615	739	685
s_31721	NO-TARGET	329	276	414	404	702	701	518	271
s_55115	SUPT16H	479	410	473	506	487	403	467	154
s_46560	CSH1	456	215	313	314	422	378	338	303
s_50318	LOC100130451	1186	1048	1018	1176	1345	1338	953	1141
s_30722	NISCH	495	148	297	517	677	501	506	480
s_54036	NCOA2	631	953	1001	879	539	658	320	482
s_56037	ISL1	520	366	572	484	564	667	525	481
s_13835	B3GALT4	789	1003	835	815	807	937	750	594
s_51529	KCNV2	248	510	262	355	479	844	699	430
s_30526	RAPGEF5	789	1137	796	1004	818	1104	1109	813
s_15038	ADH1B	265	319	230	250	239	301	269	380
s_47855	PFDN5	452	488	473	293	506	471	376	368
s_10478	IMPAD1	737	762	1043	1147	744	906	798	888
s_18066	ZCCHC8	774	803	688	444	730	575	639	451
s_46339	NRAS	300	218	242	244	294	407	270	336
s_39792	KPNA5	702	591	481	783	677	635	661	485
s_19295	EPAS1	602	597	707	906	518	604	765	632
s_8969	DDX39A	325	361	292	397	419	607	372	474
s_50396	MYH11	244	171	195	309	301	339	366	321
s_21085	ZSWIM5	397	219	138	481	758	915	659	576
s_53499	KISS1R	406	166	313	424	591	182	172	197
s_28351	PTH	702	863	907	1034	906	908	1132	748
s_14883	SND1	590	636	594	772	497	684	612	859
s_46856	PCDH8	510	364	509	735	562	590	621	621
s_52603	ZNF518B	646	726	626	809	812	577	781	467
s_36166	ZNF383	607	392	586	445	546	719	596	514
s_37026	HORMAD1	560	414	498	907	697	636	641	536
s_7393	CNGA4	980	564	468	679	1004	1468	1161	1563
s_52134	GMPR	2022	1121	1317	1044	1937	1562	1603	1153
s_42036	CGB1	897	812	740	1151	742	992	926	963
s_4406	UNC5B	591	448	528	671	907	383	829	645
s_50034	OPA3	522	696	817	392	783	797	686	657
s_33954	UBB	401	414	415	522	473	585	590	454
s_16372	MGAT4A	373	176	292	358	715	666	602	471
s_38684	RHNO1	809	566	527	801	863	912	749	661
s_46133	FTSJ3	605	369	317	269	399	499	356	416
s_9226	FOXE3	165	329	85	210	208	188	121	319
s_26468	TAS2R7	149	164	120	320	240	293	257	421
s_52260	LRRC20	359	215	261	459	578	346	297	301
s_33159	PDE7A	619	563	714	623	872	595	592	717
s_51	DBR1	304	146	251	373	290	249	280	144
s_1198	YLPM1	559	1094	443	776	767	1421	703	704
s_22324	ANKRD60	529	594	545	559	639	1056	711	991
s_15126	SLC16A1	443	233	391	703	789	788	380	823
s_37465	HTR3A	283	365	410	390	322	456	314	246
s_40065	COLEC12	381	296	330	350	396	498	487	418
s_15789	ABCB11	332	471	430	539	501	535	418	502
s_23951	AK3	818	594	649	822	765	823	754	716
s_13782	LINC02210-CRHR1	637	320	185	362	635	535	363	650
s_18573	NQO2	437	234	160	356	552	301	221	215
s_5154	RBMY1B	737	979	802	847	864	858	841	739
s_23287	DPP4	745	501	400	531	774	601	909	790
s_40174	FRY	752	550	759	483	750	874	658	556
s_4503	NRIP3	582	700	550	844	838	870	726	640
s_47692	GLYATL2	553	482	350	607	582	439	463	368
s_44419	RAC1	170	23	42	63	321	147	163	136
s_38679	LRIG3	521	668	707	784	680	929	887	833
s_55935	DEFB126	652	699	556	577	620	715	639	478
s_36018	MYRIP	627	694	744	663	714	697	613	731
s_40109	GALR2	516	263	132	423	746	972	578	411
s_2526	KRTAP3-1	226	297	390	500	240	217	267	106
s_42268	HELZ	543	455	472	621	723	705	442	376
s_48124	SGMS2	519	538	602	628	521	722	453	508
s_53179	SERBP1	530	488	642	545	511	717	671	424
s_23257	CHDH	273	302	372	238	356	312	410	146
s_1904	IFT20	740	583	360	729	549	807	605	939
s_10111	COL28A1	571	473	449	375	389	279	367	475
s_48502	ZNF469	686	772	1076	600	785	1245	863	1077
s_25244	LDHAL6B	528	419	653	851	748	1063	803	1001
s_50116	G6PD	594	421	496	414	730	586	727	506
s_4293	NO-TARGET	550	596	589	550	466	588	497	398
s_42093	FOXM1	680	1190	478	873	699	888	560	664
s_15010	MTM1	517	712	503	535	520	622	765	784
s_28850	OXCT2	744	752	809	1080	800	958	801	698
s_26170	NODAL	284	164	166	155	405	326	235	120
s_36111	SLC34A2	420	510	516	501	635	827	713	801
s_54008	ZFR2	543	634	659	840	663	587	710	514
s_37054	ALYREF	495	342	305	454	458	406	484	368
s_11599	CARD6	853	1051	724	789	986	1049	1149	723
s_45713	NO-TARGET	286	195	188	174	590	504	444	683
s_4621	ZNF16	619	336	514	577	880	896	696	553
s_14801	PLEC	414	421	442	495	374	574	363	346
s_21128	SLC26A11	630	421	780	1341	678	785	634	607
s_52996	DCHS2	519	457	392	656	777	692	683	733
s_23654	FAM20B	654	558	555	1066	928	834	831	450
s_48994	CCL4L2	392	203	265	106	245	366	251	192
s_55451	PGA3	744	636	744	705	852	875	760	649
s_13229	TTC16	754	747	794	866	871	777	934	965
s_27490	GRIK1	483	385	326	570	622	445	396	415
s_6600	GDF11	772	672	972	807	933	879	951	1023
s_12979	CXCL9	987	718	833	655	891	962	822	732
s_47912	CCNH	516	316	614	838	625	844	825	1030
s_37168	NEU1	438	398	584	283	483	593	586	553
s_49257	SV2B	227	151	209	409	456	342	521	271
s_41802	ARMC3	551	707	786	899	610	781	747	465
s_4289	TAF1A	490	584	516	522	562	576	488	442
s_4706	IHH	632	517	580	895	618	783	568	633
s_49021	RNF39	518	615	518	737	573	554	438	457
s_18070	ZNF843	634	668	785	1228	639	828	551	896
s_33591	GABRD	644	460	302	618	718	702	774	449
s_40634	ACSBG1	937	855	305	1002	1034	1034	619	774
s_46600	CLCA4	292	302	259	203	272	521	247	327
s_20197	TMEM14C	210	179	120	217	299	352	263	225
s_30530	OSTM1	781	819	767	582	1139	1427	1098	880
s_26741	PPP1R10	394	606	221	416	274	276	260	267
s_45643	DAZ1	577	540	855	690	664	574	600	486
s_27159	NUP54	709	598	665	749	783	937	534	876
s_45464	CXorf65	564	570	354	346	605	558	558	437
s_38673	STAG3	592	433	686	529	740	1048	644	973
s_24115	CENPU	506	501	684	638	575	466	697	432
s_15858	PGK1	242	209	162	213	350	324	305	505
s_5038	SRRM5	666	593	590	548	870	817	896	472
s_26032	PCDH18	457	361	447	453	457	558	559	339
s_53799	PANK4	123	151	68	73	388	300	226	265
s_51930	ZNF320	572	720	488	719	729	851	634	1003
s_35589	F2RL1	659	635	813	627	761	577	566	474
s_30427	ME2	506	306	515	433	731	625	596	717
s_37005	PRKACA	347	323	290	470	503	396	412	620
s_31026	TRPM8	574	389	433	561	611	855	424	462
s_31702	REG1A	654	522	538	713	775	738	916	574
s_40638	CDK20	468	518	334	498	471	300	372	350
s_53106	C9orf106	813	931	766	437	946	847	1021	1452
s_2187	S100A5	397	429	452	342	532	262	259	302
s_46486	GLRA1	856	799	747	1006	899	1243	715	720
s_20292	TLR2	285	313	196	202	321	381	462	337
s_14917	TNS3	382	446	446	428	574	588	920	416
s_10532	ATP10B	826	982	869	908	994	812	1010	676
s_5341	ZNF257	193	71	59	251	434	178	136	233
s_4746	REL	491	555	417	477	510	423	532	541
s_52081	CPZ	637	577	726	939	708	798	838	835
s_5849	TAS1R3	407	493	437	409	431	445	384	360
s_8721	PRADC1	635	923	618	804	604	692	645	670
s_4030	GID8	297	262	390	329	317	271	294	289
s_40464	OTOP1	371	504	467	393	526	655	643	634
s_27876	MINDY3	515	550	373	733	584	661	430	363
s_12669	NUMA1	695	698	597	863	669	971	872	865
s_15247	PRKCZ	299	247	229	466	486	287	394	316
s_43625	POLR1E	503	465	615	723	712	922	559	654
s_5099	C11orf87	713	619	673	761	919	986	1008	726
s_2007	SEC24B	450	109	349	437	313	171	165	144
s_19953	RNFT2	519	473	436	572	621	610	515	435
s_33361	NKRF	339	384	716	624	529	710	707	428
s_7150	DEFB129	618	609	473	510	577	712	573	451
s_21969	AGO2	676	666	552	697	676	719	760	965
s_3869	ZWILCH	218	117	170	365	268	245	131	180
s_26486	COX7A1	425	227	201	353	497	439	470	278
s_32276	MFN2	334	196	97	285	399	426	336	362
s_36529	HMGN4	402	359	353	405	491	668	574	690
s_1963	NEDD4L	464	183	194	410	769	603	532	420
s_36382	HSPB7	320	361	488	513	275	296	266	235
s_48	CIITA	478	705	378	546	488	647	627	546
s_33597	CPXM1	237	23	106	227	491	389	305	401
s_33255	SHTN1	555	545	463	507	689	570	722	805
s_38034	DDIT4L	112	13	58	76	200	122	150	88
s_6852	MED6	845	692	807	577	1231	1317	1189	1289
s_6957	FAIM2	1001	1167	1385	1320	1028	1694	2050	1195
s_16538	GOLGA6L10	569	562	723	766	807	1005	810	780
s_30335	GRAMD1C	983	1308	981	844	936	1009	905	951
s_26477	FAM25G	347	390	415	290	394	532	482	733
s_36869	BRD4	568	422	441	392	572	581	562	607
s_17807	PLA2G6	511	281	403	646	408	431	577	445
s_2501	RAD18	608	545	725	1105	841	1110	787	1041
s_31958	DNAAF5	168	184	252	260	379	408	496	369
s_4078	SPANXN1	852	688	921	1135	1186	1343	1071	1301
s_56122	HOXB6	512	489	543	501	354	562	464	494
s_54005	CFAP221	296	316	251	441	410	530	293	635
s_56680	MED17	828	664	444	636	970	889	880	1000
s_52626	FRMPD4	427	309	607	428	578	801	661	442
s_33076	CENPV	671	485	451	703	814	687	682	523
s_48673	TWF2	629	765	699	761	546	682	549	714
s_45979	GSKIP	525	461	555	721	613	799	574	288
s_15790	ZNF831	779	616	722	784	717	998	586	313
s_55031	AAMDC	392	219	613	365	488	394	613	241
s_27649	ALDH8A1	361	473	427	624	559	523	472	408
s_22771	ASL	611	284	556	472	744	800	878	653
s_29885	FOLR3	969	953	807	911	1097	1685	1169	1031
s_17543	SPIRE2	973	885	415	773	908	779	522	842
s_50456	TMEM114	667	947	513	949	730	793	764	746
s_9011	NRG2	596	470	528	717	641	711	577	800
s_46037	CNPPD1	467	595	480	699	536	685	824	626
s_55915	PCDH9	670	948	551	532	861	884	1057	903
s_39173	LGI3	390	445	370	632	619	721	783	679
s_32291	DEFB124	486	377	422	463	505	713	650	642
s_56114	COQ2	712	557	602	558	531	930	584	838
s_23658	LRRD1	1039	627	679	1323	689	718	692	472
s_26864	ZNF667	421	311	432	365	436	429	412	323
s_3497	ZNF519	581	410	341	550	515	719	511	520
s_16597	ITGA9	567	618	628	570	659	887	777	534
s_15119	MYOM1	511	459	363	323	390	471	363	475
s_27467	CDC123	497	377	270	391	404	458	416	115
s_2118	LHCGR	945	807	738	699	629	756	795	1036
s_20934	NDUFS2	582	664	638	607	647	881	710	899
s_39022	BDKRB2	790	533	592	1273	1173	1471	1594	845
s_41906	CACNA1H	883	468	429	804	907	1067	829	999
s_46994	GRIN2B	827	1145	2022	1074	1017	1242	1371	769
s_8754	NR1D1	209	57	63	59	348	73	76	81
s_779	RPL6	292	182	215	182	372	289	430	238
s_43129	P2RX4	258	196	324	414	469	329	547	542
s_15061	HOMER3	592	668	603	462	621	719	579	529
s_53967	IARS	351	333	239	301	397	364	420	452
s_12040	FRAT1	896	798	526	893	763	958	795	660
s_16926	TSPOAP1	501	573	339	554	592	609	628	384
s_12311	SH3BGRL	662	489	503	570	740	788	915	702
s_49880	VENTX	477	370	243	204	598	531	533	418
s_20593	NO-TARGET	547	437	610	615	603	528	571	575
s_27347	MZF1	699	800	731	762	650	837	683	515
s_38855	TPM2	943	1092	618	871	938	903	872	545
s_11845	SNX11	716	592	502	669	655	763	708	647
s_53664	ATP11AUN	475	369	311	477	693	804	584	601
s_52638	AP3D1	1066	1044	980	1018	940	959	1132	1048
s_51969	CCDC40	426	689	511	582	662	774	677	840
s_55659	PAX4	769	737	404	645	847	911	808	961
s_30997	SRSF9	449	667	535	551	474	592	475	309
s_3492	RIPOR3	389	334	336	374	500	532	584	355
s_50785	RUVBL2	673	771	702	873	766	648	839	749
s_34790	ELOVL4	456	402	273	521	655	540	578	835
s_9371	C10orf53	494	660	458	427	468	575	555	523
s_41707	PON3	837	831	741	851	923	868	922	1122
s_47723	SHPK	559	471	506	615	628	659	727	516
s_45539	TJAP1	921	966	949	1049	1006	1041	1025	734
s_36564	DPP6	755	751	398	743	901	988	726	974
s_10212	ZNF354B	818	1068	681	936	1043	936	1107	802
s_41634	FAM136A	656	351	482	583	548	500	647	270
s_237	DCUN1D4	519	360	524	595	580	378	441	394
s_38618	CTU1	660	928	531	787	979	984	1067	1052
s_1336	BET1	578	487	462	658	624	950	727	553
s_10406	ARMCX3	60	48	53	239	136	54	23	71
s_51231	RFX3	515	308	217	375	867	757	458	390
s_37342	VCX3B	228	230	231	330	362	245	242	92
s_13881	SOCS3	378	495	532	534	497	729	775	700
s_33364	GPX5	587	870	716	984	533	689	793	536
s_10274	ZFP57	414	490	402	272	590	689	705	526
s_1567	FBXL17	623	663	463	661	722	558	550	980
s_49402	PARP6	347	206	287	167	325	308	421	268
s_52684	MIER1	614	769	717	714	687	884	918	744
s_47396	ALG9	679	551	916	755	910	894	730	535
s_12594	DEUP1	519	698	473	811	778	921	765	680
s_16627	TMEM88B	527	355	592	558	475	733	668	521
s_35860	JRKL	463	814	617	762	762	939	820	810
s_24142	GPR45	399	541	471	862	698	809	654	512
s_15627	NOS3	485	565	309	800	713	674	490	870
s_17206	PLEKHO2	1070	2051	1926	1920	984	1559	1596	750
s_5933	ERLIN1	714	946	714	966	684	824	839	918
s_52287	WTIP	589	609	384	562	721	771	699	720
s_23757	ITGA2	492	534	361	450	807	734	683	671
s_28757	IFITM1	474	491	416	528	592	577	748	582
s_1411	TMEM203	563	565	555	961	779	895	846	636
s_24915	CARMIL2	418	255	378	689	693	649	536	450
s_19391	EBF4	480	323	445	436	612	681	693	464
s_20316	LHFPL3	336	389	224	358	440	524	455	428
s_28018	B2M	623	636	584	881	703	775	675	666
s_28204	ADCY1	465	714	725	732	699	566	702	375
s_31686	DKK4	578	577	558	900	603	582	630	459
s_36384	KLHL30	485	414	431	512	707	1050	715	493
s_33569	KMT2D	444	317	437	428	722	484	571	624
s_23069	MAGEB10	351	309	462	487	577	481	539	341
s_18277	SSH3	375	122	92	142	475	392	251	263
s_9390	AQP2	736	703	735	815	628	937	851	817
s_8652	NPDC1	303	281	318	243	603	532	437	320
s_26320	MAPKAPK3	393	300	170	304	421	283	353	249
s_39195	CNGB1	493	643	678	280	515	907	578	277
s_12587	IL12B	674	299	441	234	480	753	556	290
s_36407	MNDA	342	517	590	489	579	974	582	689
s_28600	EHD3	656	763	653	646	767	912	851	619
s_48846	JAG2	550	230	349	237	493	427	565	381
s_46182	TNFSF10	380	139	174	529	439	270	146	325
s_18828	TAF4B	478	645	416	755	521	749	701	715
s_47296	PHOSPHO2	662	563	691	749	737	623	717	765
s_17452	KIF26A	661	416	533	325	729	614	824	502
s_55611	MTHFR	933	726	691	1103	786	864	842	770
s_47547	RIIAD1	559	325	356	376	651	546	803	624
s_42946	UACA	174	189	203	306	249	301	340	396
s_56365	C12orf57	217	318	217	248	287	282	313	142
s_301	CEACAM3	536	340	461	591	577	671	537	541
s_44970	TBC1D26	624	871	632	958	610	979	839	970
s_38410	TGIF2-C20orf24	602	615	693	818	605	649	584	473
s_34154	RAMP1	402	229	187	312	577	424	407	623
s_11454	ZBTB8B	846	1127	673	739	1201	1434	1110	1250
s_15516	UROD	458	499	391	561	515	663	560	410
s_33347	EXO5	611	826	543	853	913	841	955	747
s_54298	DPEP2	440	356	346	551	418	561	374	509
s_16093	KIF11	752	838	10632	1245	927	903	6269	1134
s_50585	SLC2A8	341	368	387	506	397	498	453	286
s_36485	YBX1	550	668	391	660	459	575	472	678
s_1460	UBASH3A	427	525	344	477	482	545	475	427
s_52139	ZC3H14	1119	834	1362	932	1065	1087	963	893
s_40692	KDM3B	487	441	359	484	776	719	686	552
s_12258	METTL18	362	107	332	220	468	432	802	636
s_35178	NATD1	645	732	649	487	672	776	782	414
s_1231	C2orf78	400	33	55	202	498	363	144	286
s_41047	WBP4	592	547	505	590	594	547	655	409
s_5741	KIAA0556	448	215	342	484	636	517	518	370
s_50392	TBX1	922	1069	962	645	899	1345	1049	917
s_4426	POC1B	228	248	538	234	502	473	558	325
s_49556	CDX1	185	244	151	124	157	173	169	161
s_8056	RSAD2	759	527	579	785	638	390	569	543
s_15081	RET	888	474	795	691	803	685	675	599
s_24240	CNOT3	620	747	474	716	506	682	527	692
s_8915	ATF2	493	473	293	507	539	601	596	587
s_24139	TPP2	419	425	488	379	541	426	556	286
s_7544	RPSA	736	607	483	451	773	1044	852	852
s_28353	AGR2	579	536	349	537	600	691	603	414
s_49733	SEMA3E	701	821	756	831	1021	1365	1130	1222
s_18663	PROK2	350	596	267	129	719	544	556	601
s_44725	CWC15	510	470	404	346	619	826	644	367
s_43958	DERA	418	332	253	352	474	606	541	578
s_44011	CCNT1	609	556	511	469	719	786	481	551
s_25510	SAXO2	686	608	553	677	663	660	736	774
s_54325	KLKB1	463	681	304	430	470	441	471	349
s_6203	PRSS50	714	914	510	763	589	527	738	639
s_41869	LMAN2	705	639	779	544	887	913	848	808
s_12988	RPL12	596	428	451	728	687	819	803	522
s_31210	INHA	426	180	587	417	419	308	552	330
s_33266	SLC20A1	588	235	521	466	613	921	623	606
s_12868	MRPS9	917	763	950	763	964	912	658	540
s_1109	CRNN	790	947	846	515	881	560	438	563
s_22458	CCDC136	644	961	1115	968	843	829	1256	991
s_10544	TRMT112	593	510	266	297	614	670	514	546
s_52954	NUDCD2	569	770	411	623	695	948	515	637
s_22930	ZDHHC24	930	934	982	938	1248	1143	1340	1013
s_998	KRTAP21-3	669	1173	840	1119	833	817	902	722
s_28490	KCNJ3	626	513	479	703	676	788	811	576
s_36640	ENTPD2	363	321	414	498	513	697	488	694
s_47991	TIMM23	384	413	330	396	335	466	389	346
s_36413	TMEM102	580	402	359	428	549	314	550	340
s_37345	ZNF362	381	422	342	560	452	610	414	435
s_16133	FDX1	768	927	581	686	656	668	751	954
s_47893	NR4A1	414	190	472	376	661	700	633	756
s_54405	CLEC12B	384	516	277	478	365	330	418	495
s_54282	TNNI1	807	409	1110	1104	667	1001	993	490
s_22331	EID3	232	397	282	436	476	381	390	265
s_52948	SRP68	821	910	723	1130	895	1172	993	873
s_30174	CCDC114	633	424	476	712	651	555	659	662
s_1843	ASB10	538	752	741	474	651	494	624	486
s_15685	RGS14	453	449	273	236	433	479	419	205
s_28684	NEUROG3	249	420	313	481	391	410	395	279
s_7211	ENPP6	789	872	627	663	781	773	1102	743
s_27358	ECE2	682	845	698	414	854	699	860	451
s_29835	EFCC1	1248	1101	1151	1246	1373	1181	1353	1428
s_41857	SURF6	661	840	484	687	800	1046	751	730
s_31887	ZNF275	335	448	454	354	441	332	684	410
s_5245	AGXT2	643	587	568	690	559	537	523	777
s_2367	MICAL3	588	497	859	394	610	472	550	472
s_20822	ERCC4	480	444	420	361	473	446	593	516
s_31846	SOX6	226	86	64	88	462	443	203	235
s_27877	HIGD1B	642	309	430	351	731	751	560	713
s_25629	TP53AIP1	580	396	375	528	510	688	476	459
s_29981	CHRNA2	926	1183	1031	1289	1167	1451	1066	1343
s_45792	MRPL40	616	809	990	958	1018	1149	1152	861
s_39060	ATXN1L	444	429	433	366	664	778	501	466
s_28384	MAPK11	863	646	539	1214	868	903	1217	738
s_11993	GJA5	624	552	902	877	675	722	645	498
s_5137	IP6K1	579	740	498	622	699	741	899	495
s_48589	DNAL4	296	507	323	350	313	190	291	250
s_35083	WNT9A	373	317	388	378	595	640	503	316
s_54166	ANK2	766	897	975	1106	879	797	996	750
s_28479	KRTAP5-2	600	556	533	551	623	1026	693	615
s_4984	NCK1	703	629	595	751	784	1048	726	756
s_49054	HOXB1	710	577	500	829	743	877	910	684
s_43738	TIGD7	547	368	485	403	558	712	630	521
s_6899	MRLN	565	743	730	768	636	807	830	621
s_18564	DHRS7	350	240	238	352	535	538	293	435
s_10496	ERVH48-1	531	433	291	435	579	607	387	466
s_55723	POSTN	572	838	445	491	706	710	700	313
s_52459	C21orf2	555	613	548	444	769	967	742	943
s_23501	FOXI2	398	415	301	359	570	604	562	603
s_805	SLAMF1	494	576	271	336	450	522	296	281
s_10826	NO-TARGET	620	404	640	539	562	550	542	742
s_1707	ARMCX3	508	397	696	477	544	532	762	379
s_12410	TMEM128	736	710	592	499	813	1169	952	805
s_38285	VPS11	678	832	1071	841	928	811	792	843
s_48274	MRPL12	301	462	561	740	336	549	556	642
s_35038	RPS28	602	486	491	726	632	647	563	625
s_29380	CHMP2A	685	670	610	722	546	682	441	572
s_51940	CYSRT1	528	701	436	901	848	841	895	950
s_22963	SLC2A4RG	380	233	298	148	402	323	418	200
s_490	PHF5A	352	131	314	203	285	196	374	114
s_40029	CDKL1	296	77	149	195	512	608	297	601
s_47222	RXFP4	702	702	711	823	716	788	754	921
s_32458	EML6	414	398	472	767	611	674	642	679
s_55615	SMG8	346	206	147	455	476	523	433	456
s_47160	NO-TARGET	590	257	441	502	513	526	493	369
s_20581	TRAF3IP1	633	519	442	435	568	882	537	447
s_21528	IGSF9	269	510	385	486	241	443	431	401
s_46647	PTTG2	930	1024	767	1223	964	822	966	720
s_4404	ZNF597	851	1137	1071	1404	1002	806	1144	718
s_10621	SERPINA9	1030	1043	956	1084	1254	1282	1236	1082
s_12737	RNF183	663	517	607	502	841	707	595	496
s_7925	INTS7	591	463	535	438	515	531	558	271
s_20979	XKR4	785	831	706	850	856	857	957	637
s_47068	ACSM3	766	597	579	431	641	450	746	309
s_51743	GALNT15	434	467	517	432	476	972	631	440
s_44868	CCDC129	354	229	325	359	273	381	249	157
s_27822	KRTAP25-1	599	506	303	423	564	674	529	431
s_52774	TTC39B	1182	1305	1187	1041	1602	1692	1372	1675
s_47908	OR5AR1	439	632	316	491	322	459	512	366
s_18054	ACYP2	451	406	391	317	396	450	379	401
s_51815	ZBTB8A	774	729	852	1076	920	1011	888	1181
s_4368	CCDC65	823	630	907	869	587	1126	1012	595
s_30278	ASAH2	559	618	538	508	510	556	625	551
s_36979	PTAR1	513	404	500	486	484	395	293	386
s_8373	MAPKAP1	303	676	534	350	537	661	587	517
s_741	TUBG2	703	665	481	600	638	550	580	521
s_47959	HIST1H4J	433	321	301	542	555	676	443	295
s_33150	FHL3	581	408	562	830	664	821	660	455
s_12977	ACR	512	462	545	844	709	676	752	562
s_928	C1QTNF7	436	381	440	480	421	295	305	360
s_44920	MTMR6	490	786	544	567	701	825	643	553
s_11760	NO-TARGET	579	284	277	400	459	544	427	432
s_14143	C22orf42	477	527	629	618	611	540	502	408
s_52585	MRPL54	1185	743	715	962	1133	1045	1346	933
s_35504	RPL5	470	584	592	530	547	833	606	507
s_52820	EHD4	573	444	382	313	568	677	741	416
s_10714	ZEB1	691	568	501	698	646	777	470	462
s_11646	OR1J1	500	282	522	439	524	565	583	412
s_36986	SLC38A4	479	693	1083	634	541	738	683	462
s_16908	BAG2	522	408	625	420	602	412	716	556
s_28518	CDK5RAP3	806	1337	971	938	1249	1190	1312	1139
s_45434	C1orf137	826	745	800	850	866	857	973	1002
s_16027	MLLT10	862	714	792	645	832	889	810	905
s_54394	EBLN2	537	251	476	364	603	480	603	485
s_1366	C11orf24	990	1027	680	1155	1023	725	974	868
s_5447	SYCE3	824	918	583	812	1028	1040	1213	1330
s_11853	POC5	791	571	269	497	640	487	498	554
s_53271	TSPO	446	394	402	383	447	649	414	522
s_36577	THAP1	584	778	580	378	680	856	566	624
s_31790	SREK1	271	148	335	256	325	424	327	430
s_33748	MUC17	363	330	279	414	472	584	730	288
s_41404	PDE9A	741	1329	1929	1455	966	1103	1357	1335
s_54382	HOXB9	370	422	569	730	600	528	646	460
s_3862	PTH	582	332	367	623	487	406	348	300
s_1681	PTMS	518	195	747	423	579	162	251	330
s_32494	NPM1	237	32	57	164	296	101	302	127
s_21574	SQLE	418	444	647	799	662	631	623	591
s_46052	ZNF286A	837	598	419	1080	813	871	849	832
s_43941	DZANK1	753	363	395	459	738	703	703	652
s_25534	TMCO6	628	228	254	547	617	648	494	397
s_51735	OR4D10	345	285	262	225	263	395	338	226
s_54853	KLRF1	364	360	256	466	273	427	278	267
s_51075	OR10V1	459	371	413	497	387	549	457	374
s_13543	ANKRD12	533	672	541	651	693	636	1023	596
s_24456	TBXA2R	567	394	589	648	656	501	597	392
s_14745	LALBA	349	336	404	807	484	695	593	409
s_36567	AMIGO1	563	587	671	579	502	753	589	530
s_30613	RRP7A	878	816	1085	1044	940	1040	761	865
s_38340	PGRMC1	235	10	21	89	415	164	32	170
s_55650	ANGPTL6	764	671	631	947	654	391	549	321
s_39980	ZNF281	532	469	694	513	855	678	698	558
s_18101	ADCY10	740	552	493	451	737	777	659	684
s_48843	GOLT1A	452	352	637	349	570	467	637	717
s_53120	RABL2A	1170	1037	858	977	822	877	991	709
s_17508	GOLGA7B	911	707	914	993	1101	1369	1248	938
s_11462	SLC25A36	442	431	536	379	574	868	557	695
s_20504	ZNF695	651	495	551	579	771	891	970	725
s_41522	SLCO3A1	964	725	1092	664	794	940	1066	479
s_37449	C22orf23	396	431	256	506	547	583	483	536
s_11548	FUT9	862	609	494	788	864	894	927	853
s_27701	CDK1	256	111	132	177	500	399	62	290
s_50616	DLL1	778	657	485	1062	693	799	846	408
s_8959	NT5DC4	513	751	584	860	719	665	776	526
s_15087	PPP4R2	841	718	677	1166	971	936	1002	705
s_51789	SPDL1	747	727	485	594	617	937	766	1116
s_45838	FAM196B	590	645	355	487	566	712	446	340
s_51037	RPS6KB1	761	681	414	476	785	909	719	752
s_338	OR4K2	384	316	325	403	375	488	357	512
s_2012	TUSC5	494	429	286	432	557	422	543	522
s_12556	PLAU	663	720	382	663	437	488	655	524
s_51953	ACSM6	689	638	617	736	724	724	730	799
s_19191	TUBGCP6	649	519	611	758	570	791	792	537
s_35544	PHF21B	466	561	569	654	761	682	708	528
s_53370	DEFB104B	818	848	766	711	633	902	781	512
s_46358	PCTP	790	677	787	1099	1018	1090	982	1022
s_1283	ZNF611	667	557	356	740	943	651	889	745
s_12308	METTL17	588	581	712	670	569	732	765	492
s_5611	RAB40B	517	544	737	939	664	786	780	541
s_12262	MTFP1	724	628	457	394	703	639	766	818
s_21670	LAMP3	245	238	256	222	240	352	292	78
s_26857	UPF1	350	254	198	326	339	647	474	397
s_53266	ECSIT	573	556	565	629	670	877	856	839
s_12963	ZNF853	486	334	196	478	628	552	535	543
s_28464	FAM169B	703	524	522	740	689	633	525	539
s_34777	CARMIL1	369	222	296	359	262	423	343	454
s_6481	ARHGEF15	830	619	916	1143	926	781	851	706
s_47565	TNNC2	518	409	521	468	648	503	525	599
s_16753	CFHR3	407	466	393	521	486	611	583	422
s_315	EBLN1	304	230	315	269	300	442	282	253
s_2434	SELENOF	322	227	334	158	314	452	299	367
s_30671	GPC1	634	141	255	189	691	678	375	584
s_46962	IL23R	750	795	818	599	777	1108	968	805
s_13281	CAPN15	655	414	627	654	801	902	933	874
s_44815	SNX7	633	296	515	328	808	845	695	474
s_31213	BCL10	564	514	513	465	630	932	859	492
s_43153	HIC2	563	411	287	480	620	748	613	856
s_3402	GDF10	534	350	353	454	484	623	477	594
s_15602	CDC20	646	738	810	750	846	880	778	502
s_39463	GALR1	218	26	39	38	235	163	99	116
s_7262	ARIH2OS	498	508	483	875	788	586	514	857
s_46741	HYAL3	926	608	837	655	601	639	677	704
s_23349	LATS1	588	302	458	395	846	918	563	662
s_35998	C11orf24	507	469	460	663	542	706	538	275
s_44997	UROC1	1097	830	935	550	1053	1538	1645	1179
s_7917	PICK1	742	554	1470	689	600	525	1030	525
s_27312	NAA20	740	862	850	1730	809	1135	850	894
s_53778	OR2T12	444	271	367	630	339	516	511	293
s_14834	DCXR	414	572	617	528	477	689	514	698
s_51432	BAG6	580	363	295	353	427	542	384	363
s_46971	LDB2	908	829	1047	1200	1162	1435	1170	1344
s_2843	C8orf89	297	408	262	224	346	242	376	241
s_8757	PEX12	223	334	319	364	364	524	420	304
s_52985	MPZL3	736	879	815	1556	878	773	822	914
s_53782	C10orf113	450	484	582	535	528	575	499	219
s_14884	SMIM5	590	533	609	571	457	597	467	355
s_49317	PHC2	448	143	261	119	359	375	339	259
s_14518	TMEM245	282	305	185	78	236	202	285	114
s_28705	GM2A	435	564	571	408	647	830	798	638
s_48579	DCST2	534	387	288	481	674	936	552	1275
s_2792	SPAG16	327	374	370	395	420	290	300	235
s_48463	GAGE10	278	100	214	191	450	388	253	508
s_55712	ISCA1	794	1206	493	1057	903	951	770	712
s_1245	FAM47E-STBD1	1321	945	1240	1430	1197	1269	1207	1354
s_29853	BRWD3	689	719	594	789	660	829	816	775
s_35521	C9orf170	699	608	664	762	913	886	902	644
s_40361	CASC10	562	848	517	615	770	715	729	536
s_34976	TMEM126B	559	528	601	742	692	963	665	751
s_21891	NEK5	274	488	293	236	561	506	407	532
s_34862	FAM174A	532	347	477	612	401	612	543	709
s_8294	TMEM165	738	564	442	618	871	817	759	926
s_26605	LRP5	339	222	310	290	489	688	612	691
s_49218	MTM1	429	349	435	288	454	326	384	465
s_54764	OR2A5	403	136	411	57	388	393	511	365
s_29556	SAPCD1	362	280	366	296	688	689	673	1029
s_32555	LSS	760	945	585	848	719	1116	719	845
s_8288	ADCY1	516	819	633	857	642	729	927	728
s_51467	BCCIP	702	549	806	858	654	622	836	685
s_55542	TMED10	660	411	370	381	677	875	583	683
s_56084	PANX1	654	650	695	666	902	917	1198	733
s_41896	PABPC4	507	608	669	894	735	730	756	799
s_14060	SPIN2A	466	531	485	248	554	512	629	417
s_18037	SEC22A	662	819	1016	537	949	1118	1572	1433
s_1841	UPF3A	607	611	532	775	819	763	797	546
s_6619	CYP11B2	716	949	847	765	850	1172	977	692
s_52256	ADCY9	552	780	1042	778	898	825	1517	742
s_295	TNNI3K	673	575	475	704	580	580	644	482
s_23495	PRRC1	428	173	140	335	595	517	444	642
s_7076	ARPC1B	604	468	365	564	712	729	543	895
s_29643	PPFIA1	740	1171	1382	940	955	1101	1455	981
s_54095	ZSCAN30	525	724	431	463	729	981	683	458
s_40591	GLB1L3	439	331	457	248	364	276	354	221
s_18078	COL7A1	653	927	590	635	743	757	804	808
s_24651	ARMC12	645	508	384	494	511	579	561	713
s_52193	PHF13	562	648	659	770	740	650	696	712
s_2831	FAP	716	770	602	586	690	650	760	381
s_5323	C15orf54	493	335	450	500	426	360	397	442
s_47452	RPS4X	646	463	766	579	774	623	1103	671
s_41833	TMED4	328	448	333	415	519	331	325	409
s_26776	TAF8	300	171	278	633	269	240	367	105
s_53770	SLC44A4	876	683	592	659	817	1172	1092	670
s_36534	CHRNE	473	479	589	569	648	640	579	401
s_40991	GAL3ST2	806	1078	987	1107	787	1026	714	1470
s_3919	TFAP4	229	86	179	101	213	243	316	144
s_13139	RSRP1	1130	1296	1426	1219	1148	1496	1700	1066
s_1225	THBD	918	930	842	876	742	1111	838	880
s_17882	C4orf33	429	460	546	412	483	758	672	373
s_37232	NO-TARGET	480	645	442	457	569	614	548	447
s_52471	CYB5RL	563	799	552	608	671	599	818	633
s_29908	ZNF282	391	377	325	377	420	393	392	386
s_6796	ETNK1	777	877	773	748	766	978	896	845
s_8184	FGFBP1	215	104	93	263	268	279	229	141
s_53573	CDRT15	580	463	516	602	766	803	779	642
s_55503	TMEM190	344	232	196	497	392	371	343	438
s_38960	TMEFF2	586	658	492	478	656	775	678	728
s_56746	KCNJ10	651	450	447	472	681	615	580	455
s_45044	PLA2G3	696	998	952	1011	1030	1211	790	765
s_29578	TMEM126A	535	757	479	842	819	1003	807	551
s_28483	VPS51	1170	1217	1183	1230	1355	1471	1286	1700
s_41118	PENK	815	884	862	817	932	896	994	544
s_8478	TTC38	504	285	314	464	621	572	464	506
s_34817	C2orf72	643	521	363	670	752	621	711	603
s_3983	AATK	366	338	257	312	469	560	458	401
s_16614	HIBADH	835	1007	1037	1257	1000	1610	1328	1112
s_50242	C7orf55-LUC7L2	546	524	491	597	817	897	889	981
s_19896	TRIM8	240	195	157	320	323	407	377	165
s_2503	FAM126A	325	385	535	441	578	696	631	744
s_43672	SLC34A2	563	560	487	632	506	694	495	325
s_26622	FAM155A	398	696	446	605	411	559	389	303
s_32437	ALOX12	263	330	102	221	344	484	312	250
s_11403	KCTD14	581	785	592	670	609	743	596	804
s_12157	TAF6	834	925	506	808	777	848	610	677
s_21763	RBCK1	502	528	495	1037	790	783	685	844
s_55568	ZNF774	952	1277	1051	1131	1031	1047	1106	1368
s_29279	INO80	573	332	397	362	734	883	583	981
s_1721	MRGPRX2	505	433	632	504	712	1292	584	566
s_18332	U2AF1	726	1014	954	679	1150	1077	1245	1227
s_27148	DNTTIP1	707	370	267	519	647	819	424	552
s_47047	SLC6A14	594	781	980	690	696	755	942	1224
s_46652	DYRK4	923	984	980	1289	1071	1035	926	956
s_9365	RIPPLY3	329	506	385	465	383	561	540	317
s_27509	CNNM2	515	214	290	377	528	444	624	230
s_835	LRRC31	456	424	587	563	720	823	738	406
s_45809	MSRB2	833	921	1886	1550	712	609	872	662
s_5335	SHBG	690	562	629	673	691	637	639	702
s_5202	CD27	912	819	835	1446	897	1354	1010	1333
s_23791	MPHOSPH8	951	893	825	1361	930	1134	1109	826
s_47612	HRASLS5	956	501	905	713	936	722	926	718
s_27184	FAM193B	529	475	254	306	469	358	396	218
s_20559	ASB2	292	315	187	288	355	410	433	208
s_55436	GFM1	638	556	581	949	731	920	725	389
s_41240	FOXJ1	543	494	622	664	815	745	696	574
s_8477	KIAA0753	394	361	405	321	502	434	501	168
s_20326	DNAJC5G	560	516	435	720	670	628	712	720
s_29532	ETS1	329	408	56	431	449	571	169	521
s_12207	MAD2L1BP	38	34	79	126	60	174	98	334
s_39465	C10orf35	365	300	300	473	387	480	284	276
s_53607	RABL3	599	652	558	897	631	670	547	572
s_41566	SERPINI1	568	797	810	853	713	1020	714	539
s_47355	C7orf72	595	555	750	734	829	702	822	980
s_1003	METTL7B	364	397	283	327	397	384	297	243
s_8268	HCFC1	380	368	411	346	501	673	499	744
s_36926	BPIFB6	300	343	311	88	281	368	486	223
s_9262	CHRNA10	325	295	416	475	646	501	567	457
s_8165	PIP	608	338	620	839	494	569	633	315
s_47658	TAAR9	408	318	350	387	430	396	572	537
s_45473	CXXC5	386	112	197	282	602	316	217	254
s_21349	ZBTB18	485	451	389	544	527	815	570	618
s_17619	GSTM2	755	789	873	1093	774	738	777	768
s_51397	PIKFYVE	683	710	754	434	768	875	819	711
s_10849	ACSM1	619	717	644	1003	614	755	716	706
s_38807	FAM83C	789	602	682	939	730	1100	1136	654
s_11090	ANGPTL5	636	399	606	895	519	660	463	491
s_16998	BOK	508	515	435	356	663	508	483	396
s_7966	PRAMEF33	757	650	593	460	889	978	990	983
s_19163	LHFPL2	423	327	342	508	399	447	435	392
s_17649	SUV39H1	600	491	502	403	794	834	632	550
s_19888	C2CD2L	639	290	443	382	586	881	663	596
s_53461	MGST1	509	363	438	430	333	491	464	842
s_39163	FAM180B	324	457	782	1072	632	557	433	652
s_43402	RAB17	501	535	575	534	486	590	473	392
s_24881	TMEM50A	680	475	468	384	648	765	650	809
s_27522	FBP1	745	672	1236	982	876	878	1066	495
s_51882	PCYOX1	879	390	579	403	909	983	700	486
s_36973	PSMC1	582	578	904	770	731	964	913	566
s_12620	TMEM26	1042	819	1000	1081	730	1159	1011	890
s_633	DEGS2	447	414	507	417	481	344	584	398
s_47038	ANKRD12	866	621	428	616	689	774	557	531
s_45096	SIGLEC11	714	1051	970	1254	912	1148	839	966
s_28574	ORM1	1032	889	924	929	963	1352	980	685
s_43743	FLG	148	59	43	118	136	58	84	53
s_10756	DNAJC3	638	401	674	748	589	804	925	548
s_43009	BRCA1	427	362	305	520	486	397	254	466
s_53041	ATP13A2	529	611	307	408	597	518	626	453
s_330	MMP14	769	832	726	817	826	870	988	650
s_17147	ALDH2	605	599	502	557	608	649	545	560
s_551	IKBIP	419	509	492	796	434	567	551	611
s_38735	XRCC1	878	750	1054	1087	850	824	975	706
s_399	CEACAM1	277	380	214	356	322	379	355	220
s_52794	TRANK1	815	1001	1017	648	967	1093	1245	865
s_14947	ZNF587B	446	338	456	345	546	462	530	508
s_6647	MOXD1	722	736	809	675	818	1095	1113	690
s_25081	GALNT13	501	578	634	913	677	794	791	907
s_44099	ABI2	259	215	285	194	259	284	450	264
s_19754	IPPK	421	356	596	702	472	588	564	844
s_10805	LYSMD1	825	862	871	1129	716	723	897	704
s_8567	TBC1D3H	551	485	428	303	424	394	403	436
s_42463	PRX	509	584	613	596	892	1103	830	620
s_10558	CENPC	656	972	614	546	737	971	556	764
s_52189	ATP5J	1179	1289	1348	1662	1295	1536	1713	1308
s_3752	ZAP70	417	312	269	700	534	749	474	902
s_10967	IQCA1L	557	529	686	460	489	586	506	346
s_23058	LIMCH1	567	544	556	683	542	657	734	350
s_29070	HOXA3	412	437	406	243	707	559	568	956
s_11413	SLC35B1	592	156	227	369	813	612	575	718
s_29553	MS4A5	934	1037	681	1038	920	887	902	598
s_11035	C2orf50	513	637	742	572	650	934	724	977
s_8066	GPR62	759	1035	618	832	958	1041	902	861
s_41895	PSMB1	516	456	538	557	553	929	543	702
s_19215	HNRNPDL	572	531	547	517	471	548	398	535
s_55682	CCDC125	754	519	516	790	774	1188	886	825
s_24162	OPN3	599	449	548	602	866	1051	972	748
s_34952	PDS5A	650	614	481	782	659	663	711	741
s_49799	FUT6	464	641	619	547	541	593	443	296
s_55259	INSIG2	658	692	539	411	687	697	662	597
s_11720	MTTP	475	497	320	422	382	619	333	436
s_7852	ZMYM4	625	846	287	821	796	1353	889	1177
s_24699	CPSF1	568	424	471	680	473	560	423	422
s_51627	MUC2	623	799	710	659	787	680	768	695
s_10612	UGT2B28	721	657	459	670	643	742	452	433
s_25449	STAM2	259	232	168	297	259	358	336	183
s_48440	PHGDH	215	183	358	682	200	119	63	113
s_2907	DPAGT1	252	260	149	295	249	247	239	266
s_6946	CAMKMT	633	595	409	322	604	600	638	557
s_24740	LY6E	276	243	84	388	645	370	352	434
s_37721	TRIM16	580	580	658	449	502	391	718	253
s_23823	ZHX2	914	858	1698	991	700	712	1013	741
s_42135	TOP3A	580	580	516	508	738	670	795	760
s_30406	USP48	845	495	739	939	660	804	616	531
s_27908	CDC23	378	379	190	419	393	432	452	404
s_3355	GTF2IRD2	750	462	486	440	512	687	620	466
s_42524	RASL10A	248	166	182	137	428	305	268	318
s_23025	REV3L	556	523	358	566	449	589	540	449
s_25713	PAPOLG	486	542	387	690	636	659	676	829
s_18759	PJA1	824	922	670	742	857	878	1063	794
s_19912	MAP3K20	515	340	485	657	883	845	615	614
s_10989	MAGEA8	400	383	398	517	414	438	528	383
s_11000	TXK	726	919	616	774	570	793	609	510
s_48288	NO-TARGET	643	624	642	835	667	661	480	581
s_50515	B3GNT4	686	834	630	946	743	887	763	796
s_50163	SBF2	590	438	536	412	983	813	683	664
s_13386	CCM2L	618	471	535	777	553	815	708	644
s_41858	ZNF771	598	812	660	785	626	650	767	468
s_46190	CXADR	423	533	309	246	418	431	325	243
s_55229	SEMG2	507	157	237	303	372	565	456	305
s_46760	IQGAP3	1079	806	853	795	1091	1269	889	1050
s_51354	GNL1	803	915	810	1068	947	819	1006	884
s_53331	SARS	897	903	711	625	728	612	755	567
s_26698	RNF113A	328	381	267	201	400	360	450	270
s_25283	STK35	517	492	517	624	359	567	573	314
s_18938	DOCK11	890	1092	1292	1083	1006	1048	1111	472
s_26450	OR11L1	303	154	196	312	381	173	316	209
s_13988	WNT5A	634	385	366	520	605	616	515	436
s_54510	CARD18	516	617	961	727	632	609	817	982
s_28982	SMIM1	815	664	892	895	874	1205	1208	1023
s_12346	MPDU1	484	492	704	666	657	605	582	700
s_8708	BCKDHB	701	801	750	862	810	967	842	794
s_5840	RTL8A	704	515	578	543	664	792	792	1001
s_32775	CLRN3	815	676	518	661	724	790	881	836
s_32066	PPP6R1	546	404	552	740	591	788	581	606
s_10739	TSHB	476	551	488	466	464	541	562	207
s_39093	IKBKG	525	563	683	558	443	478	702	379
s_11508	PDE4A	445	461	721	689	562	656	798	626
s_19248	RAPGEF1	642	601	445	783	647	633	598	581
s_11358	LAS1L	312	212	237	408	369	372	356	100
s_7869	IFNGR2	317	442	551	567	507	499	643	608
s_36522	OR2C3	334	150	272	135	365	368	301	195
s_46967	LIPF	538	493	526	369	493	486	534	282
s_27640	THSD4	166	227	141	89	317	189	232	152
s_44687	DPPA5	619	334	528	557	764	653	585	662
s_2286	TNKS2	985	1105	1512	1151	1020	1222	1305	1016
s_36776	GPN1	437	781	425	612	602	681	553	728
s_23677	UGGT1	735	656	829	601	847	954	927	809
s_1389	TXNRD2	585	585	305	413	647	651	342	565
s_39824	HSF2BP	422	315	427	555	571	399	782	715
s_6761	OVCH1	849	838	1011	894	1087	1295	1127	1669
s_974	MRPS22	503	527	538	720	511	697	655	736
s_46738	SEMA3A	554	293	349	462	457	523	701	404
s_53912	PLIN1	523	411	623	458	491	800	497	818
s_3881	ALG2	521	477	479	570	511	635	561	577
s_10384	OR5AP2	460	404	279	142	508	559	528	416
s_4592	WDPCP	360	347	299	343	306	236	341	280
s_51340	BBS1	471	349	394	222	627	700	792	508
s_45418	SIGLEC12	752	1029	814	1067	1087	1087	799	1161
s_1945	ARPP19	824	1210	688	1255	1056	1104	813	1259
s_42188	AIF1	818	563	878	747	989	829	1032	944
s_34646	VDAC3	375	279	643	686	365	416	421	551
s_11616	PPM1A	682	933	1041	1180	715	1050	858	555
s_19993	LRP6	361	226	251	279	462	509	521	438
s_33048	GPD1	665	260	596	470	724	498	615	385
s_16214	PKN2	632	764	635	796	683	951	826	579
s_5344	TOGARAM2	817	663	596	867	709	749	618	441
s_54484	GPER1	463	433	330	668	494	531	374	547
s_16352	PLXNA1	884	566	785	1480	872	854	1173	782
s_11162	SEPHS2	592	443	683	627	833	947	949	700
s_25444	RPP25	559	567	385	680	557	604	586	410
s_24109	PPP1R14A	555	566	460	1068	703	583	501	399
s_30884	NARFL	878	513	826	896	1021	971	865	766
s_10874	SRF	739	674	430	889	892	1011	938	680
s_44530	RPS5	416	437	508	680	478	375	397	328
s_1798	CELF6	792	584	626	909	786	865	641	554
s_10109	COPS5	636	714	717	807	672	707	637	711
s_45857	IL5RA	774	537	631	868	734	812	917	665
s_52394	APOBEC3B	591	252	150	323	1125	807	369	885
s_7589	GOLGA8A	745	765	626	854	915	952	907	500
s_1921	APOO	922	896	754	880	960	909	955	657
s_38871	PPP3CA	776	1026	863	1000	860	912	774	845
s_47949	TXNRD3NB	377	392	388	357	386	521	470	213
s_9766	TXNDC15	436	357	291	360	293	594	220	164
s_11432	LMOD3	336	396	271	498	401	565	351	719
s_40831	TMEM86A	565	212	320	485	620	580	441	495
s_31665	C2orf16	429	373	434	192	345	359	369	333
s_49260	TGFBR1	240	243	225	240	332	362	284	217
s_16674	FAM46B	608	328	454	419	669	602	471	1059
s_34685	EFHD1	486	442	230	565	975	911	518	1286
s_10058	OR6B2	605	715	521	550	611	601	676	472
[truncated: 54,763 more rows]
