# Supplementary material for: Cep192 insufficiency underlies haploid instability in human cells
Source: bioRxiv preprint, doi:10.64898/2026.03.18.712690, version 1 (2026-03-20)
Supplement: Table S2 [file 712690_file04.xlsx]

## Sheet: YHS2026_Table_S2
Gene	Beta0_HAP1	Beta0_eHAP	Beta1_HAP1	Beta2_HAP1	Beta1_eHAP	Beta2_eHAP	pHaplo	group_beta0	rank_ctrl	group_beta1beta2_HAP1	group_beta1beta2_eHAP
MTERF1	-0.16596	0.079305	0.30065	0.25271	0.052341	-0.4377	NA	passed	9198	none	none
SDHAF4	-0.19368	-0.041739	0.099839	-0.10631	-0.029996	0.21924	NA	passed	9198	none	none
SPATA31A3	-0.38803	-0.37225	0.17769	0.26765	0.039334	0.20091	0.124	passed	9198	none	none
ODF1	-0.11426	-0.11889	0.072649	0.11467	-0.042313	0.020379	0.579	passed	9198	none	none
BNIP1	0.19282	0.049335	-0.26041	-0.14627	0.19903	0.023313	0.56	passed	9198	none	none
IRF3	-0.27968	-0.62134	-0.14938	0.096613	0.063024	0.17633	0.335	passed	9198	none	none
CA2	-0.33866	-0.077856	0.02269	0.16827	-0.16203	-0.19435	0.335	passed	9198	none	none
CORO1A	-0.11734	-0.056351	0.20996	0.22605	0.39691	0.18665	0.242	passed	9198	none	hit
DIRC2	0.024213	0.011923	-0.14508	-0.031933	-0.081314	0.4577	0.166	passed	9198	none	none
SV2C	-0.20242	-0.10461	0.30032	0.2597	0.06993	-0.058857	0.241	passed	9198	none	none
ZNF624	-0.021858	-0.24688	-0.054354	0.24591	0.10324	0.17855	0.326	passed	9198	none	none
GOLGA8A	0.12072	0.15409	-0.18501	-0.04621	-0.22909	-0.16249	0.15	passed	9198	none	none
GATB	-0.40042	-0.21618	0.52337	0.15796	0.13771	0.1008	NA	passed	9198	hit	none
GMEB1	-0.37388	-0.08969	0.076133	0.4168	0.23215	0.26637	0.902	passed	9198	none	none
ALG14	-0.19578	-0.005268	0.19371	0.11608	0.030728	0.20434	0.113	passed	9198	none	none
PEBP4	-0.1601	0.015248	0.28894	-0.0092696	0.042226	-0.071025	0.499	passed	9198	none	none
LCN6	-0.50485	0.048086	0.58628	0.47544	0.032555	0.053967	0.157	passed	9198	hit	none
MTIF2	-0.10699	-0.17427	0.34772	0.38599	-0.028207	-0.015139	0.354	passed	9198	none	none
SIK2	-0.063528	-0.22942	0.28241	0.022683	0.37168	0.092646	0.976	passed	9198	none	hit
GAPT	-0.12615	-0.030046	0.019684	0.40512	-0.053353	-0.21234	0.119	passed	9198	none	none
PPP1R14D	0.007884	-0.091679	-0.056957	-0.57643	-0.12062	-0.29211	0.127	passed	9198	none	none
BUB1	-0.18933	-0.0561	0.19329	0.037362	-0.030732	0.012374	0.527	passed	9198	none	none
CLCN1	-0.027619	-0.10119	0.18525	0.22261	0.089076	0.14738	0.678	passed	9198	none	none
FZD6	0.085942	-0.10031	-0.16763	-0.048556	-0.14793	-0.023658	0.473	passed	9198	none	none
AKR7A3	-0.14139	-0.057672	-0.11943	0.25751	-0.27768	-0.0035274	0.498	passed	9198	none	none
POU4F1	-0.17356	-0.0082737	0.1918	-0.080915	0.033718	-0.09585	0.98	passed	9198	none	none
PHF1	-0.51279	-0.16898	0.23007	0.12039	-0.14224	0.030508	0.895	passed	9198	none	none
STT3A	-0.13475	0.0074682	0.22275	0.15817	0.007028	0.1622	0.926	passed	9198	none	none
FBXO39	-0.19004	-0.041067	0.056984	0.29373	0.19366	-0.12212	0.318	passed	9198	none	none
CCNDBP1	0.22415	-0.0013154	-0.0032022	-0.025877	0.023001	-0.032513	0.257	passed	9198	none	none
SLITRK5	-0.17021	-0.098997	0.10452	0.28744	-0.01836	-0.16201	0.885	passed	9198	none	none
MDGA2	-0.31866	-0.23695	0.0062098	0.43979	-0.14692	0.46378	0.969	passed	9198	none	none
MPHOSPH10	-0.33	-0.084378	0.02401	0.06161	0.04326	0.09279	0.793	passed	9198	none	none
FANCD2	0.0010522	-0.010311	-0.14334	-0.21261	-0.081922	-0.071524	0.781	passed	9198	none	none
C2CD4A	-0.10349	-0.047243	-0.071689	-0.018951	-0.037443	0.060972	0.397	passed	9198	none	none
CES3	-0.44064	-0.40715	-0.12941	0.25185	0.039745	0.32052	0.354	passed	9198	none	none
RPL29	0.14651	-0.20089	-0.56496	-0.18846	-0.047715	0.033643	0.345	passed	9198	none	none
TLDC2	-0.068755	0.062707	0.14087	0.19463	0.15839	-0.031875	0.055	passed	9198	none	none
TAS2R31	-0.63867	-0.051997	0.45875	0.35167	-0.036287	0.086638	0.1	passed	9198	hit	none
TIMM17A	-0.016032	0.059456	0.13358	-0.070553	0.053835	0.30532	0.279	passed	9198	none	none
UQCRB	0.1025	-0.17295	-0.14187	-0.40323	0.060253	0.15105	0.492	passed	9198	none	none
SLC23A3	-0.32318	-0.0073591	0.018623	0.35884	-0.079295	0.13919	0.482	passed	9198	none	none
ACTL6A	-0.058195	0.22762	-0.1069	-0.07149	-0.039483	-0.38114	0.986	passed	9198	none	none
ZNF175	-0.18207	0.019622	0.27725	0.10379	0.082529	-0.25224	0.309	passed	9198	none	none
HOXD8	-0.061651	-0.14774	0.17916	-0.053249	0.16203	-0.065423	0.869	passed	9198	none	none
MYO1C	0.046263	-0.047357	0.24103	-0.027354	0.20663	-0.083293	0.749	passed	9198	none	none
PLEKHA7	0.19057	-0.12763	0.068125	0.063707	0.12103	0.04809	0.922	passed	9198	none	none
FAR1	-0.24528	-0.042296	0.0062015	0.35293	-0.15892	0.24129	0.981	passed	9198	none	none
OR5K2	0.024306	-0.03705	-0.08839	-0.13937	0.24476	0.14464	0.022	passed	9198	none	none
STK38	-0.43085	-0.089034	-0.02887	0.088903	-0.018823	-0.091435	0.518	passed	9198	none	none
C1orf64	-0.022324	0.19662	0.33436	-0.051693	-0.084054	-0.33905	0.167	passed	9198	none	none
DECR2	-0.12949	-0.036297	0.48933	0.36289	-0.010902	0.16363	0.42	passed	9198	hit	none
PPP3CA	0.11151	-0.17072	0.057463	0.42208	-0.01619	0.25308	0.967	passed	9198	none	none
NCAPG2	-0.0020645	0.094754	0.12895	0.20188	0.024744	-0.21294	0.97	passed	9198	none	none
RAPGEF4	-0.33861	-0.098766	0.026603	0.205	-0.27709	-0.22589	0.927	passed	9198	none	none
MCL1	-0.22976	-0.42301	-0.16528	0.2177	-0.0363	0.18111	0.542	passed	9198	none	none
METTL14	0.034996	0.079618	-0.11649	0.30859	-0.087064	0.13923	0.468	passed	9198	none	none
AMT	-0.11092	-0.039887	0.22177	0.32691	0.036407	0.018742	0.109	passed	9198	none	none
TRPV3	-0.61758	-0.070129	0.41609	0.086256	0.10669	-0.35229	NA	passed	9198	none	none
RPL36	-0.25304	-0.14169	0.12344	0.18857	0.22769	-0.088274	0.459	passed	9198	none	none
EBNA1BP2	-0.28521	-0.0746	0.093505	0.56728	-0.16616	0.059553	0.176	passed	9198	none	none
MTUS2	0.30635	0.23097	0.19113	0.14387	0.080308	0.17409	0.808	passed	9198	none	none
TMEM25	-0.055791	-0.039981	-0.16172	0.03095	-0.0033842	-0.087548	0.338	passed	9198	none	none
PNPLA8	-0.013906	0.045672	0.13086	0.039346	0.12444	0.36913	0.208	passed	9198	none	none
ARSG	0.0046184	-0.040965	-0.071122	0.071864	-0.33495	-0.17669	0.552	passed	9198	none	none
CHORDC1	0.2169	-0.13905	-0.19414	-0.10264	0.19685	0.089463	0.656	passed	9198	none	none
CCDC60	0.010723	-0.14994	0.034619	0.11121	0.056753	-0.25359	0.355	passed	9198	none	none
MST1	-0.060806	-0.4738	-0.19919	0.02757	0.079852	0.49969	0.306	passed	9198	none	none
RGPD4	0.013808	-0.20837	0.17935	0.17323	0.044966	0.17182	0.026	passed	9198	none	none
FOXN4	-0.65996	-0.58999	-0.048543	-0.32094	0.0029105	0.20632	0.891	passed	9198	none	none
ITGB1BP2	0.36938	0.033042	-0.20911	-0.41095	-0.032984	-0.16403	NA	passed	9198	none	none
ZHX3	-0.033048	0.074562	0.14074	0.15849	0.017263	0.082537	0.591	passed	9198	none	none
SLC6A4	-0.20011	-0.014884	0.32342	0.13768	-0.042272	0.060928	0.714	passed	9198	none	none
OR2B3	-0.2263	-0.052016	0.41097	-0.0084198	-0.070941	0.16267	0.025	passed	9198	none	none
DBX1	-0.13568	0.061665	0.1286	0.20392	-0.056317	-0.056573	0.963	passed	9198	none	none
APTX	-0.45679	0.057127	0.2637	0.73568	-0.2125	-0.033278	0.309	passed	9198	none	none
GPR61	-0.12875	-0.15576	-0.38807	0.050971	-0.0044895	0.37418	0.198	passed	9198	none	none
ZNF98	0.10829	-0.016149	-0.16946	-0.42013	0.065609	-0.35616	0.039	passed	9198	none	none
ZYX	-1.0178	-0.55699	0.45944	0.39819	-0.049414	-0.33545	0.209	passed	9198	hit	none
LIG1	-0.32648	0.16786	0.16374	0.22034	-0.27862	0.017742	0.731	passed	9198	none	none
MAPK8IP3	-0.50993	-0.096277	0.22993	0.36134	-0.05557	-0.24957	0.928	passed	9198	none	none
ALKAL1	-0.27565	-0.08078	0.13301	-0.086806	0.048072	-0.10113	NA	passed	9198	none	none
LMNA	-0.051266	0.14681	0.22227	0.12669	-0.00080554	-0.092085	0.719	passed	9198	none	none
FAM205C	0.10936	-0.019092	0.05238	-0.09669	0.13801	0.14229	NA	passed	9198	none	none
TES	-0.45251	-0.37283	0.0085023	-0.24398	0.12284	0.55022	0.393	passed	9198	none	none
IQCF5	-0.24918	0.12439	0.12194	0.084693	-0.15102	-0.075452	0.127	passed	9198	none	none
KRT27	-0.1384	-0.024176	-0.11661	-0.30138	0.11299	0.15006	0.198	passed	9198	none	none
FAM186A	0.13636	0.16593	-0.065645	0.24827	-0.083233	0.2063	0.45	passed	9198	none	none
HELT	-0.27292	-0.11603	0.79943	0.28054	0.27252	-0.0074248	0.902	passed	9198	hit	hit
XKR8	-0.84501	-0.23279	0.52618	0.7597	0.040261	0.41657	0.335	passed	9198	none	none
MRPS25	-0.015888	0.15662	0.087364	0.10646	-0.055611	-0.21382	0.422	passed	9198	none	none
TAF5	-0.13901	-0.17332	-0.017181	0.068575	0.033698	0.075467	0.816	passed	9198	none	none
CD2	-0.20824	-0.014648	0.083345	-0.06059	-0.15024	-0.059935	0.094	passed	9198	none	none
MEGF9	0.3791	-0.087764	-0.6444	-0.55546	0.1264	0.14482	0.951	passed	9198	none	none
ABCA3	-0.13576	0.016047	-0.092894	0.10779	-0.11216	-0.048864	0.213	passed	9198	none	none
RHOQ	0.029529	0.0083379	-0.15946	-0.16146	-0.02318	-0.012301	0.576	passed	9198	none	none
OSGIN1	-0.48401	-0.4953	-0.2559	0.51473	-0.14761	0.44321	0.226	passed	9198	none	none
METTL13	0.031677	0.24357	0.014472	0.16295	-0.16858	-0.38172	0.409	passed	9198	none	none
NXPH1	-0.19282	-0.1124	0.060955	0.08602	-0.12229	0.14041	0.602	passed	9198	none	none
TNFRSF10C	-0.46349	-0.14882	0.043589	-0.24108	0.14547	0.21786	0.163	passed	9198	none	none
KCTD9	-0.10013	0.1863	0.21346	-0.12846	-0.28069	0.063192	0.76	passed	9198	none	none
FXYD6-FXYD2	-0.27211	-0.22683	0.18105	0.34977	0.26675	0.5277	0.535	passed	9198	none	none
PIGH	0.19531	-0.016754	-0.17126	-0.39559	-0.12136	-0.14993	0.52	passed	9198	none	none
TCEAL6	-0.14848	-0.20378	0.23294	-0.011045	0.46104	0.091381	NA	passed	9198	none	hit
TTC28	0.20096	-0.055349	0.0060317	-0.018603	0.21903	0.35866	0.969	passed	9198	none	none
IKBKB	-0.33312	-0.45846	0.48778	-0.16981	0.51967	0.17481	0.508	passed	9198	hit	hit
VWA5B2	-0.86686	-0.37329	0.26494	0.65462	0.083311	0.11052	0.688	passed	9198	none	none
MARS2	-0.45323	-0.18049	0.54807	0.61181	-0.033113	-0.023906	0.275	passed	9198	none	none
OR12D2	-0.0072031	0.12204	0.016469	-0.079384	-0.31398	0.14741	0.074	passed	9198	none	none
MED19	0.23443	0.031874	-0.15106	-0.10539	-0.1095	-0.40139	0.262	passed	9198	none	none
SLAMF7	0.049932	0.0014619	-0.13955	-0.15796	-0.04165	0.067403	0.137	passed	9198	none	none
SSX7	0.30844	-0.15369	-0.36672	-0.30458	0.092239	-0.11835	NA	passed	9198	none	none
TMBIM6	-0.26149	-0.074646	-0.15062	0.25384	-0.12724	0.19435	0.557	passed	9198	none	none
TRAPPC4	-0.026242	0.082833	-0.098926	-0.27498	-0.087677	-0.14702	0.422	passed	9198	none	none
RCOR1	-0.084938	-0.079288	0.12412	0.30772	0.071561	0.076631	0.973	passed	9198	none	none
RXFP2	-0.14163	-0.16048	0.17327	0.046306	0.081778	0.052175	0.092	passed	9198	none	none
CSN1S1	-0.53644	-0.082886	0.37253	0.38765	-0.12701	-0.15013	0.066	passed	9198	none	none
DPF1	-0.11613	-0.08256	0.1368	0.20396	0.18613	0.1356	0.712	passed	9198	none	none
DEFA6	-0.4289	0.045125	0.11045	0.31252	-0.13991	-0.23129	0.412	passed	9198	none	none
CSPG5	0.030382	-0.15024	-0.28378	-0.11531	0.23594	0.01105	0.193	passed	9198	none	none
PHLDB2	-0.6034	-0.27296	0.75971	0.85082	0.14944	-0.0097883	0.632	passed	9198	none	none
AP3S2	-0.092014	-0.04355	-0.031554	-0.20988	0.1084	0.086882	0.32	passed	9198	none	none
TRPC3	-0.2594	-0.038701	0.096493	0.10056	-0.0061076	0.039343	0.468	passed	9198	none	none
CD151	-0.3067	-0.16755	0.51869	0.15125	0.055984	-0.13628	0.551	passed	9198	hit	none
LPO	-0.15347	-0.047692	0.22785	-0.034876	-0.095419	0.037717	0.504	passed	9198	none	none
TMED6	0.066825	-0.040401	0.26679	-0.14246	0.064612	-0.041799	0.442	passed	9198	none	none
DUSP7	0.13315	-0.13002	0.014672	0.13203	0.33138	0.086687	0.387	passed	9198	none	hit
SPARCL1	-0.17518	0.10508	0.061065	0.10256	-0.096549	0.00017605	0.098	passed	9198	none	none
ZBTB6	0.23734	0.064472	-0.34633	-0.058183	-0.18546	-0.14553	0.485	passed	9198	none	none
ABCG1	-0.038011	-0.12745	-0.15097	-0.24527	0.17771	0.43761	0.841	passed	9198	none	none
WDR47	-0.14988	-0.0084618	0.24143	0.26671	0.16067	-0.019957	0.236	passed	9198	none	none
FARS2	0.033381	0.1343	-0.1448	-0.049897	-0.16719	0.032114	0.646	passed	9198	none	none
SASH3	0.19317	0.1009	-0.34787	-0.15351	-0.15529	0.071353	NA	passed	9198	none	none
STXBP5L	-0.038398	0.21155	-0.13109	0.12704	-0.13845	-0.24689	0.526	passed	9198	none	none
ARMC5	-0.38021	-0.18026	0.22252	0.34218	0.2667	0.091135	0.296	passed	9198	none	none
TRAF3	-0.084497	-0.010005	0.038043	0.20356	-0.075676	-0.11482	0.955	passed	9198	none	none
P3H4	0.013366	0.13469	0.36094	-0.22571	6.93e-05	0.058263	NA	passed	9198	none	none
MAT2B	-0.2	-0.22683	0.05112	0.019313	-0.089768	0.057699	0.916	passed	9198	none	none
GLTP	-0.17549	-0.2285	0.084387	-0.22471	0.18352	0.2671	0.634	passed	9198	none	none
PPP1R11	-0.61141	0.093492	0.29222	0.50281	-0.15657	-0.25629	0.423	passed	9198	none	none
TRIP12	-0.045847	-0.010533	0.1883	-0.18267	0.1466	0.15317	0.999	passed	9198	none	none
NAV1	-0.3002	0.035017	-0.03448	0.22126	-0.3028	-0.39411	0.99	passed	9198	none	none
MTHFD1	0.02735	-0.11783	-0.16572	0.0023036	0.0047591	-0.35236	0.837	passed	9198	none	none
TRNT1	-0.19985	-0.094123	0.16176	-0.097488	0.10065	-0.13121	0.777	passed	9198	none	none
SHTN1	0.20971	0.0071933	-0.078483	-0.39948	0.16213	0.2025	NA	passed	9198	none	none
TMEM238	-0.087419	-0.070023	-0.039981	-0.30978	-0.13727	0.23507	0.291	passed	9198	none	none
ZNF181	0.11049	-0.078497	-0.013498	-0.1394	0.077524	0.054611	0.131	passed	9198	none	none
HTR3D	-0.12848	-0.0033742	-0.25218	-0.16069	-0.1603	0.14361	NA	passed	9198	none	none
NUF2	0.11518	0.15107	-0.18781	-0.026555	-0.25362	-0.358	0.155	passed	9198	none	none
DEFB125	0.17738	0.01076	-0.0050993	-0.19037	-0.13349	0.10518	0.667	passed	9198	none	none
MRPL18	0.16322	-0.23497	0.036872	0.027784	0.22015	-0.017146	0.833	passed	9198	none	none
VPS72	-0.17103	-0.16256	0.092254	0.11932	0.04823	0.38054	0.096	passed	9198	none	none
SLC38A10	0.18074	-0.13458	-0.29591	-0.097275	0.029389	-0.046312	0.509	passed	9198	none	none
RGPD1	-0.2986	0.044441	0.10894	0.079181	-0.091393	-0.54978	0.191	passed	9198	none	none
NRBP2	-0.43526	-0.17097	0.65	0.2537	0.17198	-0.13922	0.289	passed	9198	hit	none
GFRA1	-0.039979	0.21509	-0.24649	-0.031173	-0.2122	0.12298	0.911	passed	9198	none	none
ARGFX	-0.039371	0.068507	-0.03122	0.18689	0.041189	-0.13537	0.055	passed	9198	none	none
DNM1	-0.48218	-0.20055	0.20255	0.18669	0.2195	0.084787	0.91	passed	9198	none	none
ZNF513	0.31532	-0.031376	-0.25009	-0.12475	-0.011498	0.13945	0.733	passed	9198	none	none
ARRB1	-0.28682	-0.1093	0.15882	0.10961	-0.010628	-0.069249	0.711	passed	9198	none	none
VWA2	-0.31875	-0.059839	-0.077454	0.34332	0.01156	0.26611	0.521	passed	9198	none	none
NFIB	-0.53216	-0.19642	0.3976	0.43097	0.066384	0.28214	0.999	passed	9198	none	none
GRK1	-0.34769	-0.088157	0.048838	0.094644	0.068724	0.06574	0.237	passed	9198	none	none
LAT	-0.039287	-0.11204	0.10583	-0.065814	-0.01039	-0.12554	0.169	passed	9198	none	none
CSF2RB	-0.013186	0.055573	-0.35748	-0.43471	-0.16281	0.22112	0.412	passed	9198	none	none
RP2	0.094826	-0.10212	0.24668	-0.043184	0.10712	0.21116	NA	passed	9198	none	none
KDM7A	-0.63073	-0.17555	0.3883	0.56059	0.11814	0.053133	NA	passed	9198	none	none
DMRTA2	0.23998	-0.11674	-0.14841	-0.28881	0.17179	0.25532	0.98	passed	9198	none	none
C11orf52	0.028311	0.15326	0.015557	0.23372	-0.15254	-0.10443	0.597	passed	9198	none	none
NIT1	-0.63852	0.072341	-0.032124	0.1235	-0.07346	-0.046655	0.237	passed	9198	none	none
ALDH5A1	-0.58858	-0.031925	0.23918	0.55551	-0.13826	0.063028	0.595	passed	9198	none	none
PRUNE1	0.2353	-0.017601	-0.31052	0.10427	0.042429	-0.23281	NA	passed	9198	none	none
PLEKHA3	-0.15931	-0.015211	-0.0056275	0.23358	0.19891	0.024305	0.566	passed	9198	none	none
COX20	-0.40497	-0.047277	0.049625	0.32912	0.058601	-0.0060047	0.896	passed	9198	none	none
OR6C1	0.18579	0.018246	-0.15804	-0.014622	0.00026062	-0.073254	NA	passed	9198	none	none
RCAN1	0.17234	-0.094562	-0.17736	-0.26577	0.11604	-0.063808	0.676	passed	9198	none	none
LMO1	-0.05277	-0.44906	-0.095889	0.21115	0.080214	0.32307	0.934	passed	9198	none	none
RAB22A	-0.044652	0.06492	0.44086	0.24643	-0.3174	-0.2165	0.786	passed	9198	none	none
DEPDC1B	-0.033499	-0.093939	-0.26374	-0.15956	0.21505	-0.23425	0.153	passed	9198	none	none
FEM1B	-0.25721	0.16594	0.23037	0.33625	-0.24115	0.02513	0.769	passed	9198	none	none
XYLB	-0.044112	-0.07788	0.26941	-0.15994	0.14058	-0.023311	0.285	passed	9198	none	none
FGGY	0.0059629	-0.46981	0.086607	0.38836	0.016801	0.30609	0.127	passed	9198	none	none
C1orf27	0.18038	-0.16764	-0.0084306	-0.18034	0.067795	0.21869	0.605	passed	9198	none	none
AR	-0.40627	-0.27623	0.3502	0.32689	0.52691	0.30426	NA	passed	9198	none	hit
ADGRA1	-0.79094	-0.45198	0.19107	0.50508	0.072234	0.17366	NA	passed	9198	none	none
SDCBP	-0.37391	-0.072017	-0.06	0.18572	-0.14078	0.10511	0.251	passed	9198	none	none
FAM92B	-0.63421	-0.21493	0.17517	0.37291	-0.13252	-0.065648	0.173	passed	9198	none	none
MUTYH	0.057524	0.15041	0.14396	0.16711	-0.028112	-0.093141	0.281	passed	9198	none	none
OLFML2A	-0.10938	0.081969	0.04861	0.13918	0.021773	0.061614	0.793	passed	9198	none	none
FOXI1	-0.23873	-0.015274	-0.12627	0.048207	-0.034555	0.21026	0.846	passed	9198	none	none
TEF	0.0074117	-0.18084	0.25088	-0.28421	0.10223	0.28758	0.47	passed	9198	none	none
PCDHGA12	-0.24174	-0.11321	-0.067765	-0.01256	0.068274	0.01998	0.347	passed	9198	none	none
CCDC151	-0.28763	-0.20166	0.17665	0.38867	0.095945	-0.19614	0.206	passed	9198	none	none
FCRL3	-0.26817	0.06541	0.16147	0.07998	0.034923	0.076684	0.074	passed	9198	none	none
COX4I2	0.027371	0.086541	0.033689	-0.022206	-0.13115	-0.2139	0.093	passed	9198	none	none
ABHD10	0.078154	-0.003715	-0.10815	-0.025304	0.11212	-0.0091972	0.271	passed	9198	none	none
MRAP2	-0.66392	-0.38774	0.095383	0.41118	0.057411	0.15499	0.253	passed	9198	none	none
DNHD1	-0.15149	-0.054508	0.12146	0.10965	0.00092248	0.25047	0.465	passed	9198	none	none
GALC	0.0042721	-0.10625	0.19725	0.085869	0.086933	0.13749	0.299	passed	9198	none	none
BTBD8	-0.36433	-0.3163	0.60354	0.19229	0.35993	-0.23264	0.094	passed	9198	hit	hit
PRRG4	-0.14558	0.040424	0.00429	-0.00010776	0.070812	0.17701	0.598	passed	9198	none	none
PILRB	0.078996	-0.08768	0.001686	-0.085118	0.15142	-0.029038	0.241	passed	9198	none	none
SAP130	-0.7734	-0.23141	0.4322	1.0392	-0.2007	0.24514	0.89	passed	9198	none	none
ALOX5	-0.13563	0.041626	0.016834	0.088997	0.10666	0.073138	0.249	passed	9198	none	none
ZNF816-ZNF321P	-0.2207	-0.19179	0.11673	0.2187	-0.19377	-0.11188	NA	passed	9198	none	none
SLC11A2	-0.055711	0.014655	-0.089521	-0.11	-0.1462	0.12122	0.289	passed	9198	none	none
MCTS1	-0.22753	0.067254	0.051714	-0.091753	-0.029895	0.10643	NA	passed	9198	none	none
HSD11B1	-0.17953	-0.13019	0.153	-0.12381	0.070688	0.0057399	0.632	passed	9198	none	none
CD101	-0.051407	0.074526	-0.13254	-0.17618	-0.21483	-0.34108	0.162	passed	9198	none	none
ZNF784	-0.14636	0.014953	0.29274	0.12202	0.038164	-0.084425	0.268	passed	9198	none	none
CSRNP3	-0.68252	-0.16712	0.13997	0.43687	0.076023	0.17152	0.431	passed	9198	none	none
TMPRSS11B	0.23044	0.074113	-0.061669	-0.2455	-0.28084	0.20891	0.152	passed	9198	none	none
ULBP3	-0.1951	-0.031778	-0.01433	0.41532	0.0072735	0.24665	0.259	passed	9198	none	none
ALKBH3	-0.56823	-0.16541	0.33392	0.089845	0.16201	0.28854	0.36	passed	9198	none	none
GJB6	-0.023256	-0.1497	-0.54193	-0.28201	-0.15468	-0.13812	0.07	passed	9198	none	none
LILRB2	-0.68932	-0.18713	-0.045399	0.19561	-0.13081	-0.25071	0.145	passed	9198	none	none
MEFV	0.17838	0.058105	-0.33653	-0.15109	-0.090999	0.10636	0.224	passed	9198	none	none
GPRC5A	-0.57471	-0.22651	0.45061	0.13305	0.071242	0.10309	0.595	passed	9198	none	none
CBR3	-0.034151	0.17779	0.14459	0.28756	0.0047628	-0.069248	0.571	passed	9198	none	none
LIN9	0.10772	0.06999	0.5085	0.22232	0.20178	-0.11249	0.938	passed	9198	hit	none
GSPT2	-0.062657	0.21127	-0.12646	-0.25521	-0.020905	-0.12077	NA	passed	9198	none	none
TRPM2	0.047153	-0.06668	0.2132	-0.084052	0.1943	0.2598	0.524	passed	9198	none	none
MTBP	-0.33025	-0.0059013	0.34711	0.35242	0.232	0.28738	0.675	passed	9198	none	none
EFS	-0.029335	-0.22375	0.27689	-0.30459	0.14659	0.24118	0.433	passed	9198	none	none
SFXN1	-0.188	-0.17665	0.25076	0.27056	0.14676	0.4364	0.765	passed	9198	none	none
PPIA	0.076279	-0.062751	-0.22809	-0.34765	-0.18776	0.06187	0.63	passed	9198	none	none
PAMR1	0.096406	0.11685	0.031273	-0.12091	-0.10248	0.16262	0.649	passed	9198	none	none
DNAJC22	-0.083854	0.0048304	-0.16352	0.089973	-0.10609	0.16912	0.346	passed	9198	none	none
RPP21	-0.068919	-0.036763	0.13578	-0.23102	-0.18472	-0.065224	0.114	passed	9198	none	none
FAM213A	-0.61435	-0.13571	0.47246	0.55045	0.2266	0.42295	0.744	passed	9198	none	none
ORC2	-0.062555	0.1446	0.16171	0.41571	0.001104	0.21953	0.933	passed	9198	none	none
FLII	-0.29485	-0.10616	0.38795	0.053097	0.21375	-0.014334	0.432	passed	9198	none	none
CD200	-0.4712	-0.29569	0.23369	0.24422	-0.024852	0.22732	0.226	passed	9198	none	none
CYP3A43	-0.065781	0.049111	0.093458	0.34441	0.024846	0.087388	0.061	passed	9198	none	none
C10orf55	-0.28426	-0.016602	0.15233	0.24822	-0.13101	0.093334	0.086	passed	9198	none	none
PXDC1	-0.31121	-0.18373	-0.49346	-0.40021	-0.43265	0.017793	0.5	passed	9198	none	none
MDGA1	-0.1257	0.064706	-0.0023429	-0.13253	0.10658	0.19469	0.935	passed	9198	none	none
GPAT2	-0.54406	-0.027019	0.47551	0.23549	0.21221	0.11877	0.095	passed	9198	hit	none
CENPN	0.12933	0.20113	0.11018	-0.055129	-0.14828	-0.43335	0.825	passed	9198	none	none
RAPGEF2	-0.0011064	-0.045763	0.058553	0.23064	-0.027653	0.037905	0.994	passed	9198	none	none
OR1K1	-0.28124	-0.10029	-0.0065936	0.14635	-0.12935	0.01499	0.043	passed	9198	none	none
ELK3	-0.43569	-0.38106	0.10137	-0.051466	0.15449	0.042565	0.778	passed	9198	none	none
DLG2	-0.031029	-0.14676	-0.38559	-0.55596	-0.1107	0.18491	0.986	passed	9198	none	none
PLXNB1	-0.13216	-0.044881	0.015046	0.04239	0.081431	0.10025	0.686	passed	9198	none	none
MSTN	0.020408	0.042507	0.34224	-0.168	0.12738	-0.031515	0.273	passed	9198	none	none
DCPS	-0.17744	0.050371	0.30047	0.14655	0.051426	0.088225	0.6	passed	9198	none	none
ZC3H8	-0.18993	-0.17322	0.17936	0.34317	0.18338	0.30227	0.093	passed	9198	none	none
TNMD	0.23211	0.031525	-0.33491	-0.15542	0.06405	0.037507	NA	passed	9198	none	none
CDC26	-0.40248	-0.15935	0.22289	0.54917	-0.065662	0.15966	0.642	passed	9198	none	none
ACO1	-0.17347	-0.52146	0.0084624	0.020402	0.42516	0.51899	0.626	passed	9198	none	none
NAB1	0.19739	0.19823	-0.2962	-0.061895	-0.031993	-0.17906	0.683	passed	9198	none	none
GADD45GIP1	-0.3682	-0.26433	-0.29845	-0.16319	-0.13395	-0.072695	0.161	passed	9198	none	none
SLC12A8	-0.24683	-0.035433	0.18626	0.16599	0.075198	-0.012103	0.322	passed	9198	none	none
SYDE1	0.1336	0.011188	-0.017168	0.10857	-0.030575	0.085458	0.41	passed	9198	none	none
FAM71F2	-0.15364	-0.072743	0.038967	0.010144	0.13513	-0.098109	0.197	passed	9198	none	none
THOC1	-0.18281	-0.026437	0.35568	-0.019598	0.035343	-0.21635	0.983	passed	9198	none	none
TPM1	-0.17363	-0.40052	0.1197	0.32109	-0.0004681	-0.20032	0.881	passed	9198	none	none
RBP2	0.13737	-0.031943	-0.16889	-0.28883	0.1047	0.18918	0.184	passed	9198	none	none
LGSN	-0.28252	0.12159	0.25131	0.08553	0.043911	0.026402	0.106	passed	9198	none	none
NPM3	-0.026547	0.04628	0.12162	-0.16847	-0.051181	-0.21544	0.243	passed	9198	none	none
KLK2	0.10526	-0.25666	-0.18598	-0.37795	0.1776	0.29098	0.393	passed	9198	none	none
OR10P1	-0.37887	-0.224	0.21269	-0.18543	0.33538	0.11657	0.059	passed	9198	none	hit
ZNF706	0.088029	0.047153	0.070316	-0.31736	-0.055146	0.056272	0.708	passed	9198	none	none
URM1	-0.22755	-0.0058662	0.32363	0.28792	0.11439	-0.083158	0.468	passed	9198	none	none
CMTM3	-0.40751	-0.19772	0.37704	0.35692	-0.14889	-0.032236	0.13	passed	9198	none	none
TM7SF3	0.31138	-0.035078	0.17962	0.30063	0.32991	0.26959	0.521	passed	9198	none	hit
SERPINA10	0.065376	0.01384	-0.072043	0.27314	-0.023382	0.30781	0.402	passed	9198	none	none
TIE1	-0.22477	-0.1142	-0.11265	-0.21496	-0.013385	-0.088642	0.274	passed	9198	none	none
RPA1	-0.16256	0.082736	-0.13085	0.19029	-0.1369	-0.4867	0.938	passed	9198	none	none
FAM222A	-0.074462	-0.032411	0.25817	0.034692	0.12305	-0.0076366	0.88	passed	9198	none	none
SLC25A23	-0.021073	-0.24737	0.060973	0.082495	-0.17448	0.29908	0.356	passed	9198	none	none
CHID1	0.21873	0.082279	0.76708	0.15906	0.33517	0.15655	0.729	passed	9198	hit	hit
ETV7	-0.097658	-0.03018	-0.085007	0.050546	0.00054797	0.24438	0.317	passed	9198	none	none
CEACAM7	-0.33538	-0.27524	-0.18	-0.42727	-0.042709	0.3307	0.097	passed	9198	none	none
AKAP10	0.026063	0.12871	-0.14715	-0.35392	-0.18226	-0.12778	0.406	passed	9198	none	none
BAMBI	0.26237	-0.39342	0.00061403	0.071315	0.22508	0.19292	0.78	passed	9198	none	none
GKN1	0.22717	-0.15143	-0.139	-0.051714	0.12932	-0.01088	0.187	passed	9198	none	none
UGT1A6	-0.21166	-0.068046	-0.040875	-0.092342	0.052352	0.0082161	0.541	passed	9198	none	none
MAL2	-0.074466	-0.33305	-0.37719	0.038759	0.15384	0.081925	0.738	passed	9198	none	none
DGKE	-0.44351	-0.099332	-0.014781	0.059677	-0.29211	0.102	0.617	passed	9198	none	none
C1orf100	-0.19513	-0.081926	0.12331	-0.05014	0.18198	0.017391	0.521	passed	9198	none	none
COLEC10	-0.42707	0.084403	0.25466	0.20356	5.79e-05	0.077233	0.267	passed	9198	none	none
PRAME	-0.31076	-0.065818	0.2182	0.083229	-0.072267	0.024963	0.158	passed	9198	none	none
VPS37B	-0.27548	-0.037659	0.3057	-0.073104	-0.086744	0.078397	0.422	passed	9198	none	none
OR4C45	-0.3655	-0.094509	0.08218	0.44964	-0.054078	0.11097	NA	passed	9198	none	none
MAPK1IP1L	-0.40844	-0.24382	-0.20599	0.19397	-0.18344	0.1094	0.628	passed	9198	none	none
AKAP9	-0.28947	-0.19129	0.033448	0.02023	-0.045781	-0.016955	0.729	passed	9198	none	none
BCL7A	-0.34367	0.034203	0.36439	0.23599	-0.051983	-0.1434	0.595	passed	9198	none	none
SLC35D2	-0.45279	-0.016274	0.5743	0.38801	0.20034	-0.078128	0.297	passed	9198	hit	none
AMELX	-0.40079	0.16616	0.20473	0.27604	-0.21238	-0.15682	NA	passed	9198	none	none
COMMD9	-0.12256	0.097259	0.28892	0.11827	0.049671	-0.021031	0.153	passed	9198	none	none
APELA	0.076077	0.066062	0.016485	-0.20622	0.12094	-0.22977	NA	passed	9198	none	none
LAGE3	-0.026191	-0.11083	0.14898	0.20411	-0.014975	-0.011846	NA	passed	9198	none	none
HTR5A	-0.42513	0.017555	0.42084	0.21017	-0.01894	-0.33152	0.469	passed	9198	none	none
STRN4	-0.56135	-0.10247	-0.21675	0.15139	-0.4566	0.18288	0.75	passed	9198	none	none
TBC1D19	-0.24767	0.013924	0.60333	0.7304	0.09143	-0.28278	0.488	passed	9198	none	none
AKR1C4	-0.1504	0.19603	0.15404	0.061464	0.057328	-0.15055	0.133	passed	9198	none	none
SELENOP	-0.43956	-0.12778	0.5042	0.35367	0.069258	0.14083	NA	passed	9198	hit	none
S100A2	-0.012522	-0.16377	0.011285	-0.079041	0.085023	0.3897	0.268	passed	9198	none	none
MAP2	-0.24586	-0.15498	-0.75987	-0.14498	-0.67354	0.2346	0.821	passed	9198	none	none
FAM185A	-0.11553	0.11717	-0.056119	-0.038879	0.060151	-0.012306	0.264	passed	9198	none	none
DBNDD1	0.036898	-0.25725	-0.44393	-0.096048	-0.21381	0.20265	0.181	passed	9198	none	none
QDPR	-0.48011	-0.037809	0.44868	0.065282	0.15156	-0.054936	0.6	passed	9198	none	none
CACNA1S	-0.48112	-0.34957	-0.48375	-0.23996	-0.23683	-0.20488	0.812	passed	9198	none	none
TRIM32	-0.22683	-0.311	-0.067979	0.0076234	0.157	-0.17378	0.356	passed	9198	none	none
RAB41	-0.5072	-0.14591	0.36222	0.35733	0.03663	-0.072411	NA	passed	9198	none	none
WFDC3	0.011751	0.099955	-0.37904	-0.22053	-0.011956	-0.12837	0.194	passed	9198	none	none
WDR20	-0.41669	-0.59631	0.27256	0.35715	0.25233	0.39836	0.971	passed	9198	none	none
USPL1	-0.42093	-0.28297	0.14102	0.504	-0.00055972	0.17376	0.706	passed	9198	none	none
KRT4	0.0095933	0.049557	-0.12788	-0.0201	-0.1325	-0.16342	0.287	passed	9198	none	none
JTB	-0.20698	-0.20116	-0.022547	-0.043153	0.22611	0.28589	0.11	passed	9198	none	none
ZNF675	0.049856	-0.058259	-0.1397	-0.18122	0.056159	0.36457	0.098	passed	9198	none	none
LAMP3	-0.34629	0.12206	0.30035	0.17852	0.080008	-0.2197	0.684	passed	9198	none	none
PLAUR	0.01386	-0.13279	0.099552	0.059316	0.1083	0.19394	0.18	passed	9198	none	none
LRRC37A2	-0.2244	-1.38e-05	0.3368	0.276	0.13378	0.31138	NA	passed	9198	none	none
USP25	-0.061635	0.050478	-0.11737	0.12108	-0.096219	0.053376	0.975	passed	9198	none	none
TSPAN16	-0.11831	-0.10332	0.061067	0.079685	0.073977	0.12315	0.072	passed	9198	none	none
C16orf72	-0.23773	-0.2045	-0.087822	-0.20279	-0.026658	0.14475	0.978	passed	9198	none	none
SHANK2	-0.040005	-0.17086	0.10215	0.041237	0.20155	0.103	0.522	passed	9198	none	none
LDLRAD1	-0.5495	-0.36062	-0.22578	0.31437	-0.21722	-0.0082196	0.198	passed	9198	none	none
ARSK	0.13865	0.027629	-0.11401	0.053869	0.0061093	0.04527	0.121	passed	9198	none	none
ZNF304	0.092403	0.11466	-0.09845	-0.020842	-0.018775	-0.21371	0.227	passed	9198	none	none
C17orf99	0.011585	-0.10672	-0.040602	-0.12399	0.028441	-0.1177	0.764	passed	9198	none	none
BORA	-0.2189	-0.01331	0.33249	0.069738	-0.051732	-0.14564	0.796	passed	9198	none	none
RHOXF2B	-0.20936	-0.11406	0.14966	0.23871	0.041492	0.074235	NA	passed	9198	none	none
KRT1	-0.25544	-0.076367	-0.13138	0.21332	0.013475	0.2012	0.489	passed	9198	none	none
CHI3L2	-0.24593	-0.10177	0.46246	0.28624	0.23344	0.17947	0.347	passed	9198	hit	none
LMAN2	-0.1084	-0.13035	0.15384	-0.28305	0.13153	0.31202	0.654	passed	9198	none	none
RNF157	-0.068907	-0.44185	0.16309	-0.13587	0.083396	0.44975	0.585	passed	9198	none	none
RABL6	-0.15675	-0.11069	0.087825	0.34705	-0.18265	0.10847	0.715	passed	9198	none	none
MARCH4	-0.31436	-0.31103	0.012567	0.019545	0.2588	0.45305	0.748	passed	9198	none	none
NPIPB5	-0.28026	-0.13937	0.12386	0.61774	-0.10288	0.19044	0.177	passed	9198	none	none
CDC34	-0.36429	-0.2056	0.16575	0.10157	-0.095715	0.082399	0.576	passed	9198	none	none
N4BP2L1	-0.080065	-0.012078	0.13858	0.028167	0.082644	0.044884	0.253	passed	9198	none	none
CTHRC1	-0.25795	-0.12929	0.1949	0.32564	0.018868	-0.19733	0.266	passed	9198	none	none
CENPB	-0.086112	-0.10628	-0.18472	0.16709	-0.52197	0.1287	0.608	passed	9198	none	none
MCM4	-0.84725	-0.14267	0.29745	0.49412	-0.25477	-0.17544	0.411	passed	9198	none	none
ABCG4	-0.18394	-0.047768	0.11366	0.072605	0.009145	0.28058	0.512	passed	9198	none	none
HMGCS1	-0.016113	0.015261	-0.11051	-0.11429	-0.044631	0.079097	0.916	passed	9198	none	none
CHAT	0.10437	-0.034382	0.058613	0.12216	0.14736	0.037933	0.143	passed	9198	none	none
ASIC2	-0.18274	0.039378	0.24832	0.017353	-0.041361	-0.31283	0.947	passed	9198	none	none
ADRB3	0.032359	-0.22442	0.45282	0.12026	0.22858	0.26477	0.525	passed	9198	hit	none
COPB2	-0.21919	-0.093787	0.065635	0.26091	-0.13943	0.086563	0.979	passed	9198	none	none
KIAA1210	-0.28799	-0.2065	-0.16215	0.13685	-0.10693	-0.078365	NA	passed	9198	none	none
TBX3	0.22579	0.19889	-0.20551	-0.1389	-0.096503	-0.24616	1	passed	9198	none	none
TNS3	0.18102	0.023172	0.0168	-0.13541	0.32733	0.199	0.958	passed	9198	none	hit
PSCA	-0.26933	-0.096831	0.39813	0.13336	-0.023599	-0.038485	0.422	passed	9198	none	none
POLR2H	-0.48342	-0.31276	0.014941	0.33267	0.16516	0.060365	0.786	passed	9198	none	none
HMMR	-0.19578	-0.19393	-0.24544	-0.244	0.016128	0.0729	0.619	passed	9198	none	none
CNEP1R1	-0.66239	-0.1118	0.43403	0.39011	0.10161	0.07802	0.338	passed	9198	none	none
COL23A1	-0.013679	0.13376	0.071671	0.34329	0.10004	0.021063	0.604	passed	9198	none	none
NACC1	-0.15866	-0.17098	-0.1091	0.06648	0.11311	-0.070721	0.864	passed	9198	none	none
PHLPP1	-0.37037	-0.26994	0.3085	0.40402	0.19851	0.4583	0.982	passed	9198	none	none
PCP4	-0.1306	-0.11838	-0.070304	0.31588	0.069407	0.036531	0.611	passed	9198	none	none
GLE1	-0.095527	-0.034496	0.22932	0.19106	-0.057305	-0.098253	0.353	passed	9198	none	none
RNF6	-0.53612	-0.22573	0.37794	0.68595	0.36707	0.046055	0.517	passed	9198	none	hit
UNKL	-0.2489	0.022599	0.3642	0.50189	0.13961	-0.33695	0.491	passed	9198	none	none
CC2D1B	-0.14078	-0.13571	-0.0066666	0.22144	0.094065	0.021916	0.5	passed	9198	none	none
LIM2	0.07468	0.0077337	-0.40695	0.063584	-0.041001	-0.086061	0.119	passed	9198	none	none
CTSW	-0.1518	0.01741	0.0053367	0.19832	-0.030074	0.013881	0.1	passed	9198	none	none
ALLC	-0.021232	-0.019963	-0.10269	0.0062994	0.10522	-0.088747	0.614	passed	9198	none	none
TAF4	-0.43994	0.026231	0.36704	0.54408	-0.072168	0.42451	0.991	passed	9198	none	none
FAM196B	-0.25533	-0.16077	-0.29048	0.063157	-0.24712	0.10273	0.924	passed	9198	none	none
VNN3	-0.0010541	0.12123	-0.15457	-0.19516	-0.26608	-0.17921	0.138	passed	9198	none	none
BBS4	-0.48102	0.04069	0.19397	0.78117	-0.27729	-0.1853	0.408	passed	9198	none	none
FER1L6	-0.19381	-0.025118	-0.18659	-0.1061	0.002984	-0.042787	0.085	passed	9198	none	none
BORCS8	0.010974	0.086861	0.026081	-0.0709	-0.027734	-0.20394	NA	passed	9198	none	none
VSIG4	-0.0023675	0.025158	-0.1644	-0.10029	-0.13139	-0.19972	NA	passed	9198	none	none
ZNF546	-0.098342	-0.18308	0.15121	0.29638	0.27666	0.36257	0.126	passed	9198	none	hit
ZNF493	-0.20884	0.11348	-0.053488	0.040061	-0.090941	0.08989	0.093	passed	9198	none	none
TRIM44	0.076852	0.068709	0.10576	-0.032107	-0.0038347	-0.12976	0.51	passed	9198	none	none
CTNS	0.094944	0.12704	-0.07299	-0.059477	-0.095501	0.061128	0.277	passed	9198	none	none
METTL21C	0.26413	-0.0024587	-0.092851	-0.26518	0.11135	-0.018883	0.399	passed	9198	none	none
CAVIN4	0.1429	-0.16002	0.08408	0.050109	0.23611	-0.076946	NA	passed	9198	none	none
YIPF6	0.065317	-0.20335	0.22219	0.10761	0.41899	0.30445	NA	passed	9198	none	hit
GRIK4	-0.23978	-0.2967	0.23165	0.26797	0.28875	0.097914	0.962	passed	9198	none	hit
CHCHD2	0.11888	-0.075115	-0.19159	-0.28456	0.055829	0.019988	0.092	passed	9198	none	none
THBS3	-0.55013	-0.092527	0.47949	0.58296	0.0039068	0.19397	0.239	passed	9198	none	none
VAMP5	0.065162	-0.042031	0.067989	-0.20279	0.010661	-0.097395	0.144	passed	9198	none	none
TRIM25	-0.19047	0.0069405	-0.12654	-0.1218	-0.11272	-0.10218	0.501	passed	9198	none	none
LRRC34	-0.17765	0.040399	-0.094895	-0.0057778	-0.015803	0.051779	0.224	passed	9198	none	none
IFITM10	-0.024236	-0.049361	-0.037286	-0.39291	0.1546	-0.032938	0.716	passed	9198	none	none
BCL9L	-0.4355	-0.14845	-0.21787	-0.21988	-0.23043	0.25515	0.968	passed	9198	none	none
MIGA1	-0.062291	0.19284	0.27437	0.099201	-0.17581	-0.19885	NA	passed	9198	none	none
PALM2-AKAP2	-0.52325	-0.075466	0.39744	0.38419	-0.0081019	-0.20526	0.627	passed	9198	none	none
ADAMTS12	-0.024416	-0.089579	-0.18153	-0.04881	0.035075	-0.064547	0.556	passed	9198	none	none
SRP9	-0.49086	-0.053433	0.56989	0.31063	-0.068653	0.32568	0.613	passed	9198	hit	none
TPK1	-0.43493	0.015477	0.28104	0.28221	-0.021576	0.012567	0.367	passed	9198	none	none
CLK4	-0.11112	-0.088858	0.22123	0.30205	0.10306	0.27948	0.751	passed	9198	none	none
GLB1L	0.088236	-0.13485	-0.25908	-0.12813	-0.30118	0.094264	0.35	passed	9198	none	none
PYCARD	-0.2166	-0.24609	-0.11191	0.13446	-0.26235	0.41973	0.168	passed	9198	none	none
RNASEK	0.19728	-0.00022776	0.052044	-0.078216	0.011494	0.076625	0.578	passed	9198	none	none
SYT13	-0.3373	-0.13287	0.62305	0.39155	0.31103	-0.13832	0.327	passed	9198	hit	hit
GKN2	0.19989	0.21454	-0.17975	-0.22878	0.10572	0.05718	0.095	passed	9198	none	none
MAB21L3	0.28423	-0.16322	-0.15593	-0.22769	0.075923	-0.04625	0.112	passed	9198	none	none
PTRH1	-0.29706	-0.042445	0.023216	0.070204	0.11218	0.07411	0.241	passed	9198	none	none
TAF8	-0.24771	-0.023659	0.3389	0.62739	0.15721	0.17312	0.178	passed	9198	none	none
ADARB1	0.10154	0.010962	0.034866	0.076042	-0.033888	-0.014335	0.895	passed	9198	none	none
AMOTL1	0.091034	-0.09383	-0.23312	-0.29966	0.079001	0.27746	0.516	passed	9198	none	none
FAM151B	0.32179	-0.1321	-0.25552	0.039657	-0.068583	-0.024427	0.074	passed	9198	none	none
LCE2D	-0.50981	-0.048925	0.36235	0.17943	0.0094962	0.025055	0.065	passed	9198	none	none
COL26A1	-0.047559	-0.055658	0.02741	0.038342	-0.067691	-0.045888	NA	passed	9198	none	none
SIX5	-0.55796	-0.65761	-0.41151	0.022163	-0.13644	0.46488	0.672	passed	9198	none	none
TBCK	-0.22659	-0.17427	0.30859	0.3502	0.26768	0.41481	0.141	passed	9198	none	none
RBM15	-0.18405	0.067338	0.18189	0.0039623	-0.10187	-0.19494	0.77	passed	9198	none	none
PSMB6	0.02742	-0.030184	0.043011	0.0069083	0.039165	-0.14869	0.298	passed	9198	none	none
HGH1	-0.13304	-0.075052	-0.13638	0.012675	0.088245	0.39794	NA	passed	9198	none	none
SLAIN1	-0.212	-0.16049	0.26154	0.1585	0.12235	-0.094018	0.885	passed	9198	none	none
DSCR3	-0.25012	0.26114	0.25553	0.47533	0.073094	-0.049115	0.65	passed	9198	none	none
CDC42BPA	-0.084215	0.1778	0.18497	0.11239	-0.23288	0.010045	0.927	passed	9198	none	none
IL17REL	0.0053271	-0.060981	0.031405	0.035107	0.059008	-0.15798	0.643	passed	9198	none	none
OR51I1	-0.0039417	0.019941	0.24836	0.040375	0.3161	-0.01286	0.048	passed	9198	none	hit
SHC4	0.016313	-0.034506	-0.10839	0.091206	0.072486	0.082606	0.372	passed	9198	none	none
NOL10	-0.032927	-0.21132	0.27766	0.30745	0.23671	0.1557	0.926	passed	9198	none	none
UBXN7	-0.20232	-0.27794	-0.064522	0.093314	-0.016023	0.30065	0.979	passed	9198	none	none
SH3BP5L	0.062607	0.023989	-0.095151	-0.19762	-0.16577	-0.037187	0.541	passed	9198	none	none
PPP2R5A	-0.10488	-0.076153	0.054306	0.060855	0.062391	0.27751	0.931	passed	9198	none	none
JAG1	-0.42837	-0.21423	-0.16723	-0.4362	-0.0033933	-0.19738	0.999	passed	9198	none	none
VEGFD	0.072332	0.26655	-0.20827	-0.090706	-0.084187	-0.097885	NA	passed	9198	none	none
RNLS	-0.13285	-0.07398	0.024442	-0.1213	-0.04234	-0.15136	0.218	passed	9198	none	none
CYP11A1	-0.5328	0.0074291	0.43857	0.90436	-0.27358	0.030603	0.678	passed	9198	none	none
RNF26	-0.36038	-0.45947	-0.27092	0.032443	0.058713	0.56381	0.269	passed	9198	none	none
CHIA	0.08961	-0.081926	0.054644	0.052078	0.016662	-0.0098635	0.032	passed	9198	none	none
EVX1	-0.20017	-0.14317	-0.2635	-0.45219	-0.12317	-0.011751	0.839	passed	9198	none	none
RNFT1	-0.05674	0.068284	-0.11593	0.17698	-0.030981	-0.065499	0.354	passed	9198	none	none
ALKBH4	-0.26051	-0.068266	0.34972	0.36394	-0.035476	0.070233	0.159	passed	9198	none	none
TRAP1	0.062773	0.01787	-0.052079	0.23725	0.024776	0.066847	0.245	passed	9198	none	none
TUBA1C	-0.09047	-0.005202	-0.52523	-0.045723	-0.63326	-0.15101	0.264	passed	9198	none	none
C19orf81	-0.06781	-0.14009	-0.086915	-0.026394	0.11432	0.0088583	0.151	passed	9198	none	none
C10orf12	-0.41184	-0.079795	0.45421	0.25929	0.12284	0.11153	0.413	passed	9198	hit	none
ZNF423	0.096105	-0.00056357	0.04971	0.13151	0.17183	-0.24711	0.987	passed	9198	none	none
FBXL16	-0.02983	0.25006	0.16342	0.24016	-0.21365	-0.32311	0.552	passed	9198	none	none
ABCC12	-0.37725	-0.033699	0.25102	0.46559	0.14387	0.086815	0.148	passed	9198	none	none
CD1C	-0.23597	0.15308	0.083777	0.10525	-0.15332	0.076643	0.035	passed	9198	none	none
C19orf84	-0.18849	0.037376	0.28788	-0.023297	-0.1107	0.20704	NA	passed	9198	none	none
HAS3	-0.18414	0.047991	-0.128	-0.060203	-0.19747	-0.10769	0.9	passed	9198	none	none
MAGEE2	-0.17638	0.1143	0.39201	0.33384	-0.095672	-0.029326	NA	passed	9198	none	none
CTU2	0.091092	0.17146	-0.25663	-0.34271	-0.21824	-0.066581	0.687	passed	9198	none	none
C1QTNF5	-0.45817	-0.10523	-0.19215	0.082056	-0.13274	0.15479	0.808	passed	9198	none	none
SRPK1	0.0086132	0.063248	-0.1636	-0.11641	-0.15144	-0.44298	0.44	passed	9198	none	none
ICMT	-0.36701	0.038727	0.16119	0.39701	-0.13503	0.24432	0.934	passed	9198	none	none
CEACAM1	-0.0048064	-0.2583	-0.74802	-0.429	0.16551	0.5004	0.303	passed	9198	none	none
STARD8	-0.34682	0.063631	0.099883	0.29166	-0.083274	-0.004105	NA	passed	9198	none	none
NDUFA12	-0.043289	-0.08496	0.03976	0.31286	0.12254	0.26477	0.396	passed	9198	none	none
SPIRE1	-0.17126	-0.083551	0.21208	0.48011	0.029238	0.29165	0.496	passed	9198	none	none
DDX6	-0.15774	-0.46683	-0.36775	-0.071235	0.017797	0.25251	0.954	passed	9198	none	none
ANKHD1-EIF4EBP3	0.11241	-0.10453	0.28231	-0.030161	0.11758	-0.08774	0.945	passed	9198	none	none
ZW10	-0.079307	0.16645	-0.058988	-0.10323	-0.2166	-0.25814	0.583	passed	9198	none	none
CYP11B1	-0.032313	0.035654	-0.0031616	0.11992	-0.054601	0.096712	0.672	passed	9198	none	none
RFNG	-0.090261	0.12249	0.30218	0.31106	0.20066	0.12025	0.264	passed	9198	none	none
HECW1	-0.16569	0.12718	0.044571	0.136	-0.19499	0.091057	0.982	passed	9198	none	none
CBWD6	-0.36778	-0.40352	0.31147	0.87029	0.18102	-0.11533	0.086	passed	9198	none	none
GBP2	0.21931	-0.035139	-0.37666	-0.14746	0.24762	-0.59418	0.137	passed	9198	none	none
HSPA8	-0.12773	-0.19004	0.33312	0.59207	-0.031089	-0.15997	0.973	passed	9198	none	none
DUSP27	-0.17064	-0.070351	0.43544	0.3496	0.20921	0.32465	0.249	passed	9198	none	none
DNAJC5	-0.11771	-0.35481	0.36248	0.62878	0.13515	0.24519	0.438	passed	9198	none	none
FAM47B	-0.019928	-0.032219	-0.22869	-0.45847	0.078084	0.011828	NA	passed	9198	none	none
ZNF486	0.040333	-0.093744	-0.071494	-0.25439	0.033797	0.083023	0.04	passed	9198	none	none
ELOA2	-0.5052	-0.298	0.061469	0.2501	0.16375	0.23147	NA	passed	9198	none	none
PCIF1	0.23655	-0.11885	-0.39661	0.032359	0.12584	0.20664	0.605	passed	9198	none	none
BMP3	-0.29328	0.0061674	0.16369	0.28751	0.068955	0.099517	0.243	passed	9198	none	none
MTHFS	-0.03407	-0.14977	0.067038	0.31641	-0.021555	-0.2119	0.554	passed	9198	none	none
OR6C4	-0.20367	-0.0093871	0.050419	-0.013306	-0.066992	0.20434	NA	passed	9198	none	none
DEXI	0.1236	-0.35532	-0.031077	0.18724	-0.09216	-0.50094	0.25	passed	9198	none	none
METTL23	-0.2634	-0.20724	-0.21249	0.44038	-0.19815	0.17668	0.718	passed	9198	none	none
ESR2	-0.21874	-0.095889	0.10463	0.20424	0.22052	-0.18154	0.394	passed	9198	none	none
TSPYL5	-0.10518	0.010347	-0.13201	0.25874	-0.24203	-0.17249	0.35	passed	9198	none	none
MTRNR2L7	-0.015539	0.056665	0.09204	0.15658	0.094038	-0.25158	NA	passed	9198	none	none
DNAJC18	-0.28655	0.023453	0.1142	0.24895	0.034848	-0.054621	0.179	passed	9198	none	none
RGL1	0.18312	0.26412	0.19461	0.19274	-0.027946	-0.19802	0.91	passed	9198	none	none
CRCP	-0.21389	0.00071128	0.34066	0.15248	0.017459	-0.047043	0.308	passed	9198	none	none
CNTLN	0.11739	-0.078329	-0.37932	-0.25297	0.083988	0.058874	0.158	passed	9198	none	none
CENPQ	-0.40791	-0.22308	0.53799	0.47921	-0.016752	0.10357	0.174	passed	9198	hit	none
CCDC77	-0.00083207	-0.083769	-0.15599	-0.3453	0.089205	0.18218	0.581	passed	9198	none	none
C7orf57	-0.33983	-0.43056	0.0064636	-0.27746	0.22674	0.078845	0.204	passed	9198	none	none
PCDHA5	0.014375	0.02452	0.070481	0.056568	-0.028223	0.16122	0.138	passed	9198	none	none
MUSK	0.27843	-0.20008	-0.0095598	-0.093465	0.27972	0.2329	0.176	passed	9198	none	hit
HIP1R	-0.072211	-0.49627	0.43729	0.14341	0.17204	0.38303	0.429	passed	9198	none	none
ABCC6	-0.023583	-0.13824	-0.1945	0.18755	-0.018259	-0.0050858	0.664	passed	9198	none	none
ZNF496	-0.18769	-0.19128	0.16154	0.19533	-0.14608	0.33662	0.907	passed	9198	none	none
PRDM14	0.13016	0.15242	0.095029	-0.097507	-0.021167	-0.14267	0.59	passed	9198	none	none
COQ6	-0.26955	0.10623	0.22848	0.12367	0.076599	-0.27805	0.167	passed	9198	none	none
LINGO4	0.10574	0.159	-0.13754	0.16674	-0.45818	-0.046858	0.214	passed	9198	none	none
PRLHR	0.076339	0.15894	-0.18518	0.26844	-0.12349	0.11356	0.797	passed	9198	none	none
FBXO31	-0.0039646	-0.19367	-0.095758	-0.17184	-0.01344	0.24433	0.956	passed	9198	none	none
ZNF345	0.069852	-0.078301	-0.16434	-0.1741	0.19709	0.32629	0.053	passed	9198	none	none
RSPH3	-0.26148	-0.1273	-0.052458	0.26757	0.010034	0.39042	0.342	passed	9198	none	none
CX3CL1	-0.404	-0.14728	-0.17392	-0.17862	0.067621	-0.058699	0.512	passed	9198	none	none
RXRA	-0.42605	0.14734	0.56115	0.43167	-0.069758	-0.1589	0.941	passed	9198	hit	none
CEP250	-0.39799	-0.074861	0.27723	0.51734	0.11305	0.16442	0.323	passed	9198	none	none
ZNF570	0.015923	-0.13523	0.075527	0.11305	0.088496	0.30597	0.103	passed	9198	none	none
LAMC2	-0.67914	-0.021395	0.29861	0.45105	-0.065225	0.062704	0.43	passed	9198	none	none
GSAP	-0.52352	-0.25875	0.14611	0.35278	-0.16206	-0.12965	0.406	passed	9198	none	none
PRRC2B	-0.19303	-0.017403	0.29567	0.23726	-0.2578	-0.028044	0.983	passed	9198	none	none
SSTR1	-0.45315	-0.12909	0.21838	0.27542	0.002395	-0.12687	0.463	passed	9198	none	none
KRTAP17-1	0.24954	0.10254	-0.28672	-0.0010594	-0.23756	-0.25979	0.226	passed	9198	none	none
SPPL2C	0.059129	-0.094734	0.029297	-0.041398	0.10022	0.054381	0.094	passed	9198	none	none
DMRT3	-0.76847	-0.309	0.23913	-0.079429	-0.25094	-0.36306	0.992	passed	9198	none	none
ZFAND4	0.21605	-0.15574	0.12503	0.10442	-0.02337	0.036177	0.087	passed	9198	none	none
NYAP1	0.36469	0.12266	-0.3019	-0.16977	-0.15802	0.060867	0.417	passed	9198	none	none
EEF1A2	-0.3644	0.0022766	0.21452	0.048281	-0.15957	-0.090619	0.935	passed	9198	none	none
ATP5L2	-0.17808	-0.039225	0.035615	-0.032397	0.080809	0.036231	0.305	passed	9198	none	none
ANKRD6	-0.22942	-0.090067	0.33707	0.13433	0.049333	-0.079328	0.375	passed	9198	none	none
REEP4	-0.37801	-0.3378	-0.23944	-0.099234	0.16495	0.29334	0.298	passed	9198	none	none
MAP3K20	-0.24716	-0.22178	0.2473	0.44174	-0.010949	-0.0518	NA	passed	9198	none	none
DERL1	-0.14306	-0.10187	0.13651	0.0085417	-0.047507	-0.0053061	0.69	passed	9198	none	none
KIAA1683	-0.16359	-0.12319	0.083371	0.50455	-0.11365	-0.020557	0.195	passed	9198	none	none
DCAF1	-0.020043	0.06939	0.057423	0.11322	0.16039	0.24123	NA	passed	9198	none	none
CD83	-0.29378	-0.24981	-0.20085	-0.036801	-0.22891	-0.094254	0.545	passed	9198	none	none
SLC9A4	0.11183	-0.21447	-0.073091	-0.27964	0.23077	-0.081496	0.303	passed	9198	none	none
RNF138	-0.016598	-0.15984	-0.31822	-0.53782	0.20701	0.0762	0.623	passed	9198	none	none
TRIM34	-0.021423	-0.080736	0.023969	0.064297	0.3488	0.23754	0.272	passed	9198	none	hit
RBFOX2	-0.60371	0.019569	-0.15235	0.2908	-0.57165	-0.025306	0.973	passed	9198	none	none
VDAC2	-0.027204	0.1234	0.059215	0.036818	-0.065956	-0.029316	0.898	passed	9198	none	none
ZSCAN12	-0.16361	0.02108	0.10478	0.19772	0.069584	-0.064704	0.294	passed	9198	none	none
MPI	-0.21515	-0.12541	-0.049721	0.16965	0.11013	0.20663	0.409	passed	9198	none	none
CENPO	-0.0076808	-0.047714	-0.30433	0.26796	0.0052799	-0.12953	0.287	passed	9198	none	none
CEP68	-0.6097	-0.057876	-0.68706	0.3593	-0.4542	0.10018	0.49	passed	9198	none	none
MTUS1	-0.37136	0.03684	0.22488	0.27689	-0.043076	-0.10091	0.562	passed	9198	none	none
UNG	-0.66482	-0.29966	0.19595	0.38185	0.098149	0.1916	0.489	passed	9198	none	none
SSTR4	0.1928	-0.14097	-0.15387	-0.10851	0.37235	0.43289	0.246	passed	9198	none	none
SMAD1	-0.10699	-0.109	0.065593	0.33084	-0.10646	0.38657	0.985	passed	9198	none	none
SGSM1	-0.16288	-0.044684	0.17104	0.29999	0.27588	-0.024642	0.22	passed	9198	none	hit
TTLL7	-0.026658	0.1085	-0.014669	0.023664	0.17756	-0.081676	0.489	passed	9198	none	none
WFDC2	-0.081611	-0.12338	-0.092643	0.0031632	-0.024954	0.38608	0.426	passed	9198	none	none
APOBEC2	-0.11866	0.10065	-0.22492	-0.1349	-0.21206	-0.01963	0.551	passed	9198	none	none
RASSF3	-0.062543	-0.055869	-0.021303	0.30681	-0.12165	-0.072789	0.462	passed	9198	none	none
CDH16	-0.54138	0.0018172	-0.0071304	0.36449	-0.2437	-0.15988	0.652	passed	9198	none	none
SLC5A1	-0.22649	-0.0082228	0.1898	0.042055	0.14518	0.030386	0.751	passed	9198	none	none
RAPH1	-0.028357	0.099979	0.23539	-0.029459	0.036591	-0.056413	0.99	passed	9198	none	none
TMEM74B	-0.43926	-0.045789	0.28624	0.31446	0.072093	0.062085	0.942	passed	9198	none	none
GATAD2B	-0.20815	-0.13942	0.15848	0.098912	-0.037989	0.17734	0.928	passed	9198	none	none
TARS2	-0.077498	-0.017818	-0.095931	0.079817	0.014388	0.30158	0.154	passed	9198	none	none
TXNDC5	-0.56943	0.042422	0.56348	0.28482	0.0076264	0.024612	0.856	passed	9198	hit	none
PRKAB2	0.10255	-0.17995	-0.15901	0.095026	0.027512	0.3474	0.555	passed	9198	none	none
DNM3	-0.14148	-0.071388	-0.027644	0.14483	0.1175	0.049099	0.496	passed	9198	none	none
ADRA1A	-0.29588	0.0048537	0.49775	0.82744	-0.20872	0.031977	0.339	passed	9198	none	none
CSGALNACT1	-0.1637	-0.044812	0.068147	0.21078	0.13287	-0.029285	0.458	passed	9198	none	none
MYBPC2	-0.22315	-0.044349	0.34171	0.095896	0.012206	0.058433	0.54	passed	9198	none	none
KAT8	0.13738	-0.087112	0.27001	0.22219	-0.067829	0.030707	0.247	passed	9198	none	none
LTBP3	-0.51167	-0.2211	0.61952	0.52228	0.0027739	-0.072863	0.463	passed	9198	none	none
GPR37L1	-0.042529	0.13372	0.055386	0.34282	-0.16011	-0.081727	0.118	passed	9198	none	none
PXT1	-0.1474	-0.24385	0.12296	0.3067	0.22235	-0.19097	0.219	passed	9198	none	none
C8orf37	-0.042873	0.15832	-0.054562	-0.072169	-0.48455	-0.054222	0.126	passed	9198	none	none
CKAP4	-0.4859	-0.15141	-0.076932	-0.054217	-0.20584	-0.37169	0.731	passed	9198	none	none
CYP2D6	-0.37312	-0.014982	0.14837	0.4704	-0.26189	0.074438	0.382	passed	9198	none	none
UHRF1BP1	0.090366	-0.19243	-0.3426	-0.21672	0.25833	0.086358	0.555	passed	9198	none	none
LRRC2	0.14804	0.09521	0.22995	0.41565	-0.05596	-0.31989	0.452	passed	9198	none	none
STAT2	-0.74039	-0.41769	-0.23636	0.041415	0.020709	-0.3335	0.519	passed	9198	none	none
U2AF1L4	-0.34102	-0.16484	0.077576	0.25778	-0.10883	0.089136	0.085	passed	9198	none	none
HOOK3	0.051192	-0.13981	0.10884	-0.0080252	0.057722	0.092558	0.931	passed	9198	none	none
BPIFB4	0.078294	0.02677	-0.024436	-0.11341	-0.079378	-0.12189	0.028	passed	9198	none	none
LINC01835	-0.13367	-0.18009	0.21989	-0.028921	0.26476	0.19812	NA	passed	9198	none	none
C4B	-0.2288	0.039358	-0.038713	0.12124	0.0027564	0.055966	0.615	passed	9198	none	none
ZC3HAV1L	-0.37695	-0.15034	0.074118	-0.055173	-0.060231	0.1519	0.37	passed	9198	none	none
PRRG2	-0.097137	-0.16637	-0.035684	0.10658	0.19813	0.3021	0.483	passed	9198	none	none
SLC1A4	-0.57324	-0.21827	0.094029	0.70873	-0.051402	0.02176	0.42	passed	9198	none	none
ANKAR	-0.41463	-0.13017	0.65095	0.24829	0.35948	0.12789	0.24	passed	9198	hit	hit
SPTBN5	-0.012953	-0.024616	0.26567	0.18832	0.1167	0.010005	0.129	passed	9198	none	none
PNISR	0.093229	0.089256	-0.17417	-0.11514	-0.10422	0.089012	0.934	passed	9198	none	none
DERL3	-0.035482	0.065412	0.030597	0.35924	-0.10807	0.19392	0.14	passed	9198	none	none
KCTD1	-0.26315	0.048589	-0.049317	-0.11821	-0.064969	0.14689	0.955	passed	9198	none	none
ANXA7	-0.71517	-0.26422	0.22533	0.50443	-0.27248	0.049373	0.128	passed	9198	none	none
SNED1	-0.11289	-0.084465	-0.45134	0.014258	-0.091358	0.24623	0.985	passed	9198	none	none
BTN1A1	-0.70639	-0.33655	0.61567	0.69579	-0.052834	0.037803	0.2	passed	9198	none	none
GLTPD2	-0.10656	0.0017275	0.14216	0.16098	0.24893	-0.0076751	0.487	passed	9198	none	none
ANP32A	-0.21728	-0.36411	-0.072688	-0.24772	-0.10781	0.13607	0.88	passed	9198	none	none
SSTR5	-0.2044	0.034297	-0.081086	0.25217	0.10615	0.14881	0.285	passed	9198	none	none
LOC388436	0.036492	-0.096027	0.094386	0.21898	0.16115	0.10774	NA	passed	9198	none	none
CCDC124	-0.035344	-0.12115	-0.020878	0.23565	0.16613	0.22023	0.103	passed	9198	none	none
RRAGA	-0.73076	-0.17668	0.3003	0.39919	-0.034972	-0.17858	0.321	passed	9198	none	none
GSTM2	0.07095	-0.2135	0.083246	0.29975	0.12494	0.27385	0.056	passed	9198	none	none
SUPT5H	-0.31444	0.051612	-0.042859	0.38852	-0.076177	0.08353	0.974	passed	9198	none	none
PCDHB12	0.19321	-0.015608	-0.063575	-0.048956	-0.14703	-0.25347	0.022	passed	9198	none	none
YAF2	-0.12818	0.088138	0.12615	0.18242	0.096748	0.18207	0.391	passed	9198	none	none
AIDA	0.24521	-0.070792	-0.0033231	-0.008283	0.04704	-0.023161	0.743	passed	9198	none	none
MISP3	-0.21559	0.022401	0.50632	0.22086	0.20359	0.081136	NA	passed	9198	hit	none
DNALI1	-0.1226	0.044651	-0.11708	-0.12224	0.015279	0.056071	0.371	passed	9198	none	none
OR51B6	-0.1165	0.12254	0.124	0.05314	0.17846	-0.032837	NA	passed	9198	none	none
RNF152	-0.4311	0.01224	0.57538	0.66679	-0.047371	0.23516	0.559	passed	9198	none	none
ELOVL1	-0.79692	-0.656	0.65626	0.61834	0.44247	0.53814	0.577	passed	9198	none	none
CHD2	0.34744	0.040954	-0.58215	-0.12111	-0.10877	0.16479	0.999	passed	9198	none	none
HNRNPUL1	0.15786	-0.15722	-0.13005	-0.15446	0.046658	0.064866	0.986	passed	9198	none	none
EVA1C	-0.35351	0.11941	0.31694	0.33162	-0.38204	-0.3966	0.74	passed	9198	none	none
FAM166A	-0.0096625	-0.084231	0.11195	-0.18525	0.14512	-0.15502	0.331	passed	9198	none	none
GIP	-0.38083	-0.026588	0.098959	0.089253	0.027152	-0.27902	0.191	passed	9198	none	none
GPA33	-0.03982	-0.014004	-0.0040309	-0.0070111	0.046239	0.15664	0.23	passed	9198	none	none
PROK1	-0.17153	5.88e-05	0.10552	0.24556	0.25265	0.090763	0.068	passed	9198	none	none
DACT1	-0.87068	-0.25197	0.13295	0.29076	-0.020347	0.53844	0.682	passed	9198	none	none
PPP2CB	-0.20935	-0.028598	-0.20522	0.097304	-0.066684	0.014297	0.736	passed	9198	none	none
IMPA2	-0.93876	-0.52913	0.95342	0.70441	0.33126	0.43174	0.681	passed	9198	none	none
RNF5	-0.455	0.03773	0.081386	0.095064	-0.084992	-0.17658	0.161	passed	9198	none	none
HUS1	0.051245	-0.10549	0.011388	0.39203	-0.056522	-0.18342	0.177	passed	9198	none	none
ZNF169	0.15598	0.1494	0.037655	-0.10889	-0.0047457	-0.036162	0.386	passed	9198	none	none
ANKRD34A	-0.12207	-0.043195	-0.20754	-0.19345	-0.00037439	0.59673	0.518	passed	9198	none	none
RPLP2	-0.11446	-0.10281	0.24754	0.34873	-0.034988	0.019359	0.646	passed	9198	none	none
PLAG1	-0.18811	0.020662	0.027143	0.26141	0.11053	0.25842	0.904	passed	9198	none	none
LYZL1	-0.0075042	-0.078382	0.068806	-0.053963	0.0022324	-0.099895	0.093	passed	9198	none	none
TMEM177	0.34823	-0.21572	-0.32988	-0.29501	0.12803	-0.11766	0.072	passed	9198	none	none
BAZ2B	0.37313	0.18865	-0.16599	-0.23524	0.083033	-0.11696	0.944	passed	9198	none	none
DDX1	-0.17478	-0.0083292	-0.14559	0.31748	-0.22185	-0.21861	0.987	passed	9198	none	none
EDEM3	-0.25118	0.09647	0.13875	-0.032542	-0.11377	0.0041521	0.721	passed	9198	none	none
ZNF37A	-0.50768	0.037247	0.30294	0.47159	-0.15714	0.0068051	0.081	passed	9198	none	none
PRKAG2	-0.39194	-0.07585	0.46349	0.27086	0.12459	-0.11458	0.972	passed	9198	hit	none
GAGE10	-0.22621	-0.22343	-0.065064	-0.046567	-0.018601	0.087985	NA	passed	9198	none	none
C1orf21	-0.33724	-0.69042	0.51592	0.071079	0.85444	0.40174	0.839	passed	9198	hit	none
IRS2	0.084237	-0.075491	-0.23571	-0.11137	-0.22057	0.048367	0.967	passed	9198	none	none
H6PD	-0.017952	-0.17088	0.21516	0.1603	0.16259	-0.099985	0.647	passed	9198	none	none
INO80D	-0.25091	0.12665	-0.82988	-0.27728	-0.49162	-0.39181	0.981	passed	9198	none	none
MUC21	-0.50027	-0.31484	0.22855	0.30078	-0.055986	0.44092	0.14	passed	9198	none	none
LBX1	-0.60058	-0.36673	0.46606	-1.1313	0.48076	-0.24747	0.863	passed	9198	none	hit
DENND4B	-0.0068774	-0.01371	-0.011733	-0.072393	-0.047392	0.033659	0.56	passed	9198	none	none
TMX4	-0.3391	-0.076966	0.15789	0.15042	-0.16081	-0.35528	0.717	passed	9198	none	none
ZNF696	-0.11283	0.14624	0.37596	0.14938	-0.11827	0.026948	0.235	passed	9198	none	none
SULT1A2	-0.15864	-0.14563	0.18699	0.38716	-0.27902	-0.13085	0.162	passed	9198	none	none
PRAMEF27	-0.049048	0.14225	0.26507	0.27377	0.0066879	0.017333	NA	passed	9198	none	none
ZNF735	-0.58414	0.23773	0.53625	0.38503	-0.20175	-0.31913	NA	passed	9198	hit	none
TXN	-0.017457	0.049731	-0.34638	-0.021621	-0.2199	-0.28515	0.789	passed	9198	none	none
THYN1	0.025985	-0.00018168	-0.12541	-0.37919	-0.19997	0.112	0.854	passed	9198	none	none
TGM3	0.23807	-0.2581	-0.46197	-0.15564	0.36085	0.12846	0.748	passed	9198	none	hit
RPL31	-0.18438	-0.041766	0.036373	0.16727	-0.1997	-0.11041	0.413	passed	9198	none	none
TMEM207	0.25506	0.0011237	0.051338	0.215	0.055102	-0.022049	0.17	passed	9198	none	none
FEZF2	0.10769	0.096125	-0.19071	-0.19454	0.021609	-0.18243	0.973	passed	9198	none	none
FUZ	-0.30538	-0.037201	0.34528	0.74111	0.061333	0.039123	0.317	passed	9198	none	none
CFAP126	-0.16699	-0.015042	0.16516	0.064257	0.051421	-0.14301	NA	passed	9198	none	none
SEM1	-0.046627	-0.012703	0.043496	0.23872	-0.071264	0.10962	NA	passed	9198	none	none
TRPM8	-0.20269	0.082403	0.084439	0.21908	-0.25471	-0.15425	0.195	passed	9198	none	none
MRGPRX1	-0.39017	-0.047538	0.15689	0.3162	0.18783	0.044515	NA	passed	9198	none	none
PRIM1	-0.096675	0.12559	0.05268	-0.10757	-0.091438	0.29218	0.242	passed	9198	none	none
LMX1A	0.084309	-0.0083184	-0.020934	0.0086366	0.0037504	-0.10102	0.862	passed	9198	none	none
CCDC140	-0.64484	-0.10519	0.19278	0.36716	-0.040246	-0.11393	0.833	passed	9198	none	none
CD300LG	-0.22073	-0.4013	-0.038288	0.4955	-0.10175	0.087612	0.285	passed	9198	none	none
ZNF208	-0.2173	-0.10233	-0.40208	0.10424	-0.039021	0.36035	0.033	passed	9198	none	none
USP17L10	0.25052	0.041909	-0.16791	-0.001003	-0.039147	0.039282	NA	passed	9198	none	none
EIF3CL	0.1828	-0.039659	0.067357	0.15496	-0.13826	0.15525	0.113	passed	9198	none	none
GAS2	-0.13272	-0.29623	0.13369	-0.069778	0.35102	0.30077	0.609	passed	9198	none	hit
PPARGC1B	-0.15178	-0.4259	0.25834	0.11345	0.028435	0.22792	0.855	passed	9198	none	none
GPX3	0.098004	0.11562	-0.17071	-0.19897	-0.1567	0.055214	0.553	passed	9198	none	none
PCGF2	0.037811	-0.12911	0.017043	-0.13861	0.12571	0.045421	0.744	passed	9198	none	none
CACNG1	0.072148	-0.15924	-0.10042	0.17073	0.21146	0.0069347	0.311	passed	9198	none	none
SCLY	0.1913	0.022492	-0.036109	-0.1092	0.11142	0.016608	0.913	passed	9198	none	none
CEP170	-0.14026	0.2098	0.045856	-0.25334	0.18019	-0.1669	0.991	passed	9198	none	none
MREG	-0.36253	-0.26011	0.12649	0.37262	0.065703	-0.0016843	0.546	passed	9198	none	none
NPC2	-0.075844	-0.070298	0.019971	0.083371	-0.050541	-0.095105	0.689	passed	9198	none	none
FIGN	-0.083011	0.04005	-0.10395	0.362	-0.034792	-0.17204	0.968	passed	9198	none	none
ARL4A	0.24696	-0.20954	-0.036904	-0.22031	0.14487	0.074568	0.678	passed	9198	none	none
WIPF1	0.099468	0.11409	-0.22627	-0.12239	-0.115	-0.075182	0.89	passed	9198	none	none
TMEM99	0.042337	-0.26524	0.079682	0.036769	0.10188	-0.066654	0.2	passed	9198	none	none
RGPD5	0.023322	0.13237	-0.38558	-0.13158	-0.22395	0.2353	0.099	passed	9198	none	none
ARTN	-0.20394	-0.27471	0.21521	-0.0085912	0.11481	0.12639	0.175	passed	9198	none	none
SAMD7	0.11098	-0.12791	-0.37578	-0.49672	0.21662	0.10803	0.345	passed	9198	none	none
FMN1	0.046378	0.10121	-0.11992	0.041753	-0.0076911	-0.34405	0.222	passed	9198	none	none
SGIP1	-0.28804	0.046348	0.1956	0.015555	-0.13737	-0.26818	0.956	passed	9198	none	none
GRIN2D	-0.2193	-0.018985	0.23845	0.20421	-0.18058	-0.077765	0.961	passed	9198	none	none
SOX4	0.021891	-0.20453	-0.34612	0.048439	0.16923	0.32289	0.928	passed	9198	none	none
PALLD	-0.43041	-0.7022	-0.49062	0.077344	-0.036619	0.41685	0.864	passed	9198	none	none
KAT6B	0.071426	0.02685	-0.079547	-0.019243	-0.1068	0.044714	0.999	passed	9198	none	none
NFIC	-0.71772	-0.39801	0.17098	0.28307	0.046606	0.28515	0.74	passed	9198	none	none
FPGS	-0.042401	0.1211	-0.022891	0.024242	-0.18697	-0.22061	0.473	passed	9198	none	none
OR51G1	0.12226	0.057996	-0.21698	-0.31657	0.041805	-0.054841	0.028	passed	9198	none	none
FAM206A	-0.079866	-0.080188	0.22798	-0.0090552	-0.00086451	-0.11285	0.516	passed	9198	none	none
PAK5	-0.22253	0.18178	0.12084	0.29288	-0.50899	-0.16617	NA	passed	9198	none	none
PEX11G	-0.16549	-0.21989	-0.033356	0.30169	0.081215	0.019475	0.125	passed	9198	none	none
PTH	-0.11394	-0.027553	0.12461	0.30275	0.030628	0.024115	NA	passed	9198	none	none
FNBP1L	-0.64998	-0.17487	0.22125	0.12004	0.011596	0.037909	0.772	passed	9198	none	none
LRCOL1	0.19157	-0.022369	-0.29119	-0.32797	0.056541	0.16021	NA	passed	9198	none	none
CRYBB1	-0.34603	-0.20445	-0.022307	0.33414	0.26128	0.24248	0.284	passed	9198	none	none
ITM2A	-0.12755	-0.35405	-0.16376	-0.11516	-0.27402	0.029031	NA	passed	9198	none	none
PRDM9	-0.11187	-0.05462	0.11549	0.15639	0.13862	0.2529	0.075	passed	9198	none	none
LIPM	0.16427	-0.1627	0.0026007	-0.074392	0.12364	-0.06426	0.585	passed	9198	none	none
EYA3	-0.54513	-0.11444	-0.034446	0.30033	-0.22954	-0.081753	0.964	passed	9198	none	none
NLRP10	-0.22988	-0.023959	0.067958	0.34517	0.040475	-0.27815	0.259	passed	9198	none	none
LIG4	-0.14845	0.050223	0.2623	0.44926	-0.21577	0.020699	0.625	passed	9198	none	none
TNRC6C	-0.10015	-0.021079	-0.0048323	0.097902	0.057358	0.22479	0.986	passed	9198	none	none
TMEM39B	0.020137	0.21634	0.028037	-0.21469	-0.19392	-0.18023	0.387	passed	9198	none	none
PSAP	-0.078426	-0.11457	0.23864	0.024312	0.22626	0.11916	0.567	passed	9198	none	none
C15orf41	-0.04446	0.051006	0.043494	-0.12502	-0.13403	0.12214	0.242	passed	9198	none	none
MRPS26	-0.45711	-0.19297	0.2736	0.28004	-0.11011	0.30882	0.393	passed	9198	none	none
TMEM35B	-0.22438	-0.029015	0.10553	0.19119	-0.069635	0.012209	NA	passed	9198	none	none
KLF12	-0.49637	-0.28564	0.50435	0.41228	-9.12e-05	-0.049789	0.931	passed	9198	hit	none
SH2D3C	0.055357	-0.048734	0.016585	0.14633	0.091286	0.075069	0.747	passed	9198	none	none
PLEKHO2	0.24419	0.11425	0.15521	0.13078	0.026506	-0.23709	0.302	passed	9198	none	none
STARD4	-0.16421	-0.0039364	0.23486	0.18607	-0.045841	-0.026664	0.313	passed	9198	none	none
IL31RA	0.077791	-0.0089776	-0.12553	-0.17655	0.025982	0.0089732	0.102	passed	9198	none	none
CRY1	-0.20236	0.0099557	-0.081799	-0.063991	0.17359	0.007807	0.611	passed	9198	none	none
TCHHL1	-0.30118	0.088739	-0.21219	0.22459	-0.076069	-0.25827	0.117	passed	9198	none	none
GIPC1	-0.43706	-0.071739	-0.42645	0.44269	-0.098005	-0.0047061	0.236	passed	9198	none	none
DBR1	-0.76582	-0.074647	0.29458	0.51088	-0.32391	-0.077716	0.252	passed	9198	none	none
RARRES3	-0.000683	0.13057	-0.22187	-0.030405	-0.22296	-0.088595	0.138	passed	9198	none	none
C4orf36	-0.14622	-0.24615	-0.23946	0.041389	-0.38535	0.44006	0.183	passed	9198	none	none
AVP	-0.58194	-0.10947	0.24654	0.59289	0.026589	0.15049	0.495	passed	9198	none	none
ZG16B	-0.31909	0.079909	0.23835	0.46131	-0.054891	-0.11393	0.265	passed	9198	none	none
DDX4	-0.088777	0.044975	0.16462	0.06269	0.010062	-0.016376	0.457	passed	9198	none	none
POU3F1	-0.62427	-0.46279	0.47915	0.31608	0.13717	-0.12629	0.846	passed	9198	hit	none
ADAMTS4	-0.15416	0.0055625	0.16846	0.16797	0.090777	0.12437	0.286	passed	9198	none	none
PAQR5	-0.29194	-0.33367	0.063785	-0.2132	0.26023	0.050104	0.674	passed	9198	none	none
ZNF658	-0.33804	-0.039772	0.28289	0.1115	0.2439	-0.0077276	0.07	passed	9198	none	none
PTGDR	-0.20325	-0.059665	0.09847	0.12247	0.162	0.50665	0.155	passed	9198	none	none
PPM1H	0.21766	0.1782	0.12279	0.27769	-0.094675	0.06281	0.81	passed	9198	none	none
TUBGCP4	0.099446	-0.25351	-0.31572	0.11524	-0.38338	0.096544	0.419	passed	9198	none	none
PRMT9	-0.19191	-0.013614	0.20317	-0.084686	0.20054	-0.15179	NA	passed	9198	none	none
DAW1	-0.20631	-0.09019	-0.0069646	0.268	-0.08101	-0.00015684	0.322	passed	9198	none	none
WNT9B	-0.30285	-0.24473	-0.093872	0.23355	-0.22087	0.021733	0.717	passed	9198	none	none
FTH1	-0.39505	0.12906	-0.18072	0.071475	-0.073876	-0.11242	0.218	passed	9198	none	none
DDX42	-0.14046	-0.19508	0.091324	0.24028	-0.019086	0.21889	0.988	passed	9198	none	none
ADAMTS13	0.12359	-0.051966	0.078457	0.013065	0.14919	-0.13343	0.856	passed	9198	none	none
PRSS38	-0.090556	0.031405	-0.057127	-0.058923	-0.097123	-0.2005	0.061	passed	9198	none	none
FAM96A	-0.13927	0.046002	0.057413	-0.081549	-0.055406	-0.25288	0.566	passed	9198	none	none
GABRR3	0.021324	0.024806	-0.25236	0.29609	-0.061053	-0.2135	NA	passed	9198	none	none
DCDC2B	-0.2163	0.2366	0.16498	0.28943	-0.1068	-0.12414	0.3	passed	9198	none	none
UGP2	-0.33614	-0.085543	0.061722	0.25016	-0.0021174	0.17643	0.689	passed	9198	none	none
PGAM5	-0.25405	-0.21858	0.082084	0.14643	-0.19148	-0.016681	0.727	passed	9198	none	none
AFF4	-0.12811	-0.15551	0.10432	0.43344	0.065301	0.1586	0.986	passed	9198	none	none
RAB7B	-0.20516	-0.051291	0.39778	0.44721	-0.11229	0.056066	NA	passed	9198	none	none
RHOJ	0.076934	-0.084529	0.14487	0.09188	0.059184	0.25921	0.398	passed	9198	none	none
LOC100130370	0.018926	0.040973	0.10513	-0.21026	0.14444	0.28539	NA	passed	9198	none	none
NR1H2	-0.225	-0.050557	0.14006	0.053886	0.082903	-0.049213	0.598	passed	9198	none	none
RABEP2	-0.24075	-0.23905	0.42056	0.31121	0.19399	0.18233	0.303	passed	9198	none	none
NAP1L1	-0.2184	-0.28765	0.16974	-0.0093112	-0.073579	-0.070069	0.977	passed	9198	none	none
MT1E	-0.31812	-0.37862	-0.081279	0.014372	0.20825	0.20264	0.192	passed	9198	none	none
DYDC2	-0.024152	0.030025	0.012628	-0.1214	0.061509	0.10511	0.099	passed	9198	none	none
WRAP53	-0.20807	-0.28455	-0.27387	0.18279	-0.25322	0.19755	0.361	passed	9198	none	none
FICD	0.15794	0.21376	-0.13182	-0.16805	-0.032236	0.070213	0.253	passed	9198	none	none
ZNF616	-0.014774	-0.050415	0.11387	-0.11836	-0.042507	-0.03138	0.183	passed	9198	none	none
HIST1H2BI	-0.25307	0.16714	0.028763	-0.017011	-0.27192	0.039418	0.584	passed	9198	none	none
SPATA18	-0.33333	-0.070856	0.35845	0.33803	0.011426	0.0011822	0.118	passed	9198	none	none
LRRD1	-0.36616	-0.1627	0.098529	0.35014	0.07835	-0.047209	0.227	passed	9198	none	none
TPO	-0.28489	-0.09498	0.13569	0.55031	-0.20694	-0.010659	0.626	passed	9198	none	none
LGALS3	-0.30195	-0.27416	0.062548	0.16625	-0.21331	0.039085	0.477	passed	9198	none	none
TMEM189-UBE2V1	-0.12947	0.092145	-0.011236	0.097775	-0.3542	-0.30177	0.601	passed	9198	none	none
WFIKKN2	0.016418	0.11641	-0.052843	0.2678	-0.10615	0.063207	0.418	passed	9198	none	none
ADAM19	-0.60485	-0.33133	0.41134	0.27903	0.22902	0.0036708	0.784	passed	9198	none	none
C8orf34	-0.14637	-0.012867	0.20352	-0.06324	0.0070529	0.26849	0.066	passed	9198	none	none
DCBLD2	0.017602	-0.20863	0.09173	0.015186	0.31784	0.12162	0.366	passed	9198	none	hit
RFX8	-0.29917	-0.11523	0.13523	0.1246	-0.036703	0.24047	0.081	passed	9198	none	none
IQSEC3	-0.19869	-0.148	0.066423	0.16621	-0.066169	0.19718	0.915	passed	9198	none	none
PGM2	0.21152	-0.30715	-0.36045	-0.18989	0.27483	-0.010484	0.511	passed	9198	none	hit
NTN1	-0.30127	-0.07521	0.40929	-0.005365	-0.083744	0.027415	0.986	passed	9198	none	none
PDSS1	-0.35933	-0.12209	0.26601	-0.18558	0.30197	0.23609	0.598	passed	9198	none	hit
LEF1	0.23255	-0.12454	-0.070873	-0.0037185	0.25993	0.055102	0.979	passed	9198	none	none
TATDN1	-0.34969	-0.16616	0.19651	0.2491	0.10332	0.26041	0.789	passed	9198	none	none
OR4C3	-0.069622	0.15388	-0.26147	0.3325	0.0083715	-0.086813	0.017	passed	9198	none	none
KLHL20	0.23871	0.017131	0.045084	-0.32185	0.066848	0.051276	0.444	passed	9198	none	none
LOC650293	0.051427	-0.1097	-0.21276	-0.18411	0.069094	-0.039184	NA	passed	9198	none	none
STAM	-0.1013	-0.0021409	0.33579	-0.052004	0.13518	0.1177	0.879	passed	9198	none	none
PRR3	-0.44836	-0.42582	0.46316	0.609	-0.17584	0.023618	0.247	passed	9198	none	none
ZNF709	-0.2039	0.11997	0.099696	0.018575	-0.030561	-0.087443	0.122	passed	9198	none	none
ADNP2	-0.43335	-0.28445	0.3297	0.27598	-0.060156	-0.41024	0.992	passed	9198	none	none
DSCC1	-0.42162	-0.13738	0.11077	0.21608	0.14869	0.15892	0.582	passed	9198	none	none
IKBIP	-0.5388	-0.29415	-0.048088	0.079222	-0.27254	0.10035	0.491	passed	9198	none	none
CMTM1	-0.15835	-0.030052	0.10508	-0.21378	0.29898	-0.12849	0.213	passed	9198	none	hit
ZNHIT1	0.0016438	-0.1444	-0.044306	-0.051927	0.13443	0.24605	0.166	passed	9198	none	none
RRM2	-0.21592	-0.4209	-0.0081994	-0.10507	0.043185	0.23453	0.971	passed	9198	none	none
HEXIM1	-0.63052	-0.23132	-0.05795	0.1918	-0.12588	0.27856	0.455	passed	9198	none	none
ARL14EP	0.13485	-0.27094	-0.055212	-0.08723	0.29562	0.3498	0.592	passed	9198	none	hit
GPR34	-0.018949	0.08682	-0.0024939	0.18482	0.16636	0.14104	NA	passed	9198	none	none
PPP1R9B	-0.022866	0.041063	-0.23959	-0.23725	0.0042444	-0.018204	0.832	passed	9198	none	none
HLA-DQA1	0.2362	-0.083423	-0.13316	-0.1618	0.0094638	-0.097752	0.08	passed	9198	none	none
RELL1	-0.20105	0.0021763	-0.0091031	0.20434	-0.17381	-0.14088	0.572	passed	9198	none	none
CNGB3	-0.021039	0.15025	0.17034	0.1516	-0.0095543	0.088773	0.06	passed	9198	none	none
PPCDC	-0.65906	-0.38699	0.35927	0.13565	-0.13256	0.23202	0.195	passed	9198	none	none
OR51A4	-0.5041	-0.13419	0.17752	0.44262	0.15832	0.28362	NA	passed	9198	none	none
SYNGR4	-0.64	-0.11594	0.30742	0.57934	0.070806	0.066104	0.127	passed	9198	none	none
BBS2	-0.71885	-0.30044	0.42217	0.60187	0.11022	0.32671	0.267	passed	9198	none	none
SLC7A1	-0.035823	-0.16421	0.0074303	0.045842	0.22237	0.21905	0.893	passed	9198	none	none
CTNND2	-0.28116	-0.1869	0.36405	0.040398	0.1483	0.10601	0.966	passed	9198	none	none
IFNA10	-0.55169	0.01291	0.24429	0.34851	0.086098	-0.039347	NA	passed	9198	none	none
CSAG1	0.095343	0.20206	-0.12239	0.0881	-0.36634	-0.18689	NA	passed	9198	none	none
LY75-CD302	-0.21652	0.16828	0.32786	0.38941	-0.15731	0.14104	0.118	passed	9198	none	none
MMACHC	-0.27677	0.12642	0.10097	-0.016942	-0.29479	-0.29145	0.196	passed	9198	none	none
TSNAX	-0.12341	-0.15537	0.058203	-0.18543	-0.11253	-0.019502	0.81	passed	9198	none	none
C20orf144	-0.10553	-0.11465	0.0747	-0.051339	0.068611	-0.050093	0.088	passed	9198	none	none
SPANXA2	-0.25214	-0.18749	-0.17797	0.13529	-0.10398	-0.087856	NA	passed	9198	none	none
OR4A5	0.13085	0.0077288	-0.0077725	-0.031765	0.054393	-0.24981	NA	passed	9198	none	none
ELAC1	-0.31095	0.039501	0.09473	-0.065722	-0.024671	0.069204	0.675	passed	9198	none	none
ASCL4	0.097565	-0.02296	0.038369	-0.17382	-0.20915	-0.053401	0.609	passed	9198	none	none
NUP93	-0.1686	-0.16637	0.31651	0.04613	0.21865	-0.096002	0.518	passed	9198	none	none
STK24	-0.44094	0.034942	0.45772	0.30147	-0.0094148	-0.12553	0.823	passed	9198	hit	none
MUC5AC	-0.37545	0.025022	0.090581	0.27562	-0.064437	-0.34066	NA	passed	9198	none	none
CD93	0.086213	-0.065018	-0.031709	0.15957	0.11888	0.19128	0.33	passed	9198	none	none
PARK7	-0.079197	-0.058754	0.047986	0.32097	-0.077216	0.13203	0.945	passed	9198	none	none
KANSL2	-0.0059376	0.0032023	0.22828	-0.050845	-0.013507	0.12668	0.72	passed	9198	none	none
SENP6	-0.61093	-0.22803	0.30098	0.77691	0.074067	0.41968	0.931	passed	9198	none	none
USP26	-0.011892	0.18662	-0.18224	0.024929	-0.13765	0.086573	NA	passed	9198	none	none
HELZ	0.073919	-0.14195	0.17115	0.14677	-0.19729	-0.10145	0.998	passed	9198	none	none
DDX41	0.070252	0.066826	0.025815	-0.07112	-0.048006	0.25981	0.388	passed	9198	none	none
DYTN	0.024656	0.25253	-0.20451	-0.12658	-0.22867	-0.26771	0.164	passed	9198	none	none
CTRB2	-0.20094	-0.080215	0.14028	0.14894	0.017867	0.13069	0.612	passed	9198	none	none
PLA2G16	-0.031172	-0.031568	0.1797	-0.025307	-0.038099	-0.11773	0.112	passed	9198	none	none
SP8	-0.023021	-0.35853	0.58208	0.21792	-0.17656	-0.087146	0.844	passed	9198	hit	none
MIA2	-0.27689	-0.22015	0.11591	0.18451	0.17753	0.045341	0.399	passed	9198	none	none
DNAAF2	0.26044	-0.073153	-0.16399	-0.018414	0.11056	-0.11698	0.255	passed	9198	none	none
LRTM1	-0.086082	-0.083022	-0.11791	-0.32951	-0.13054	0.089116	0.108	passed	9198	none	none
KCNH5	-0.25591	0.081618	0.23863	0.27798	-0.08973	-0.24611	0.829	passed	9198	none	none
MYCBP2	-0.17029	-0.042511	0.45026	0.084731	0.097477	0.15972	0.996	passed	9198	none	none
THSD7B	-0.052399	-0.015572	0.21902	-0.042171	0.11849	0.0271	0.085	passed	9198	none	none
RSL24D1	0.17369	0.068109	0.013379	9.33e-05	-0.014477	-0.0069553	0.766	passed	9198	none	none
OR6F1	0.093748	0.11435	0.068617	-0.35882	-0.081121	-0.09715	0.017	passed	9198	none	none
TOP2A	-0.1012	-0.076346	0.083068	0.060235	0.061707	0.031167	0.809	passed	9198	none	none
MCM3	0.14528	-0.12355	-0.68423	-0.21916	-0.22744	0.17539	0.705	passed	9198	none	none
C1QTNF3	0.16926	0.0042803	-0.30285	-0.42056	-0.10179	-0.038198	0.114	passed	9198	none	none
CHRNA6	0.090718	0.19253	0.06711	0.10936	0.0084843	0.13751	0.107	passed	9198	none	none
NANOS3	-0.29871	0.14159	0.31452	0.44316	-0.2455	-0.062312	0.12	passed	9198	none	none
HABP2	0.10967	0.075064	-0.086933	0.047959	0.15359	0.08683	0.79	passed	9198	none	none
C5orf24	0.0074126	0.04583	-0.20552	0.14423	-0.27896	-0.020231	0.281	passed	9198	none	none
SPTSSB	-0.14564	0.068444	-0.10882	0.055876	-0.16652	-0.30332	0.189	passed	9198	none	none
TPGS1	-0.045153	-0.027576	0.011064	0.19585	-0.15678	-0.17	0.373	passed	9198	none	none
TEX46	0.087927	0.15272	-0.14185	0.12253	0.21901	-0.033238	NA	passed	9198	none	none
PODXL	-0.098628	-0.10435	-0.34563	-0.14834	-0.1358	-0.05775	0.897	passed	9198	none	none
PENK	-0.1946	-0.12031	0.056504	-0.046193	0.094573	-0.20707	0.088	passed	9198	none	none
EIF5B	-0.27077	-0.14466	-0.20173	0.061475	-0.24035	0.31929	0.944	passed	9198	none	none
GSKIP	-0.083762	0.13074	-0.082522	0.23793	-0.21718	-0.18923	0.78	passed	9198	none	none
RDH16	0.16447	0.00097734	-0.11685	-0.10392	-0.05648	-0.057485	0.098	passed	9198	none	none
FAM71E1	-0.14914	-0.14275	0.42442	0.016313	0.39333	0.26512	0.129	passed	9198	none	hit
MLF2	0.13984	-0.18113	0.18875	-0.090383	0.19763	0.25362	0.688	passed	9198	none	none
RD3	-0.25768	-0.11688	0.14654	0.079551	-0.01068	-0.10566	0.278	passed	9198	none	none
EEF1G	-0.38659	0.11389	-0.016167	0.3396	-0.074054	0.006888	0.893	passed	9198	none	none
ATP8B1	0.030226	-0.039791	-0.096369	-0.056837	0.09425	0.042275	0.892	passed	9198	none	none
SOCS1	-0.20672	0.016038	0.055766	-0.11014	-0.09339	-0.27221	0.744	passed	9198	none	none
OR4L1	-0.0023642	0.22932	-0.043048	-0.65299	-0.13933	-0.23396	NA	passed	9198	none	none
XRCC5	-0.066901	-0.017556	-0.034804	0.32347	0.15103	0.1697	0.996	passed	9198	none	none
MTPN	-0.37544	-0.16924	-0.095042	0.17663	-0.13215	0.20169	0.896	passed	9198	none	none
RAB2A	-0.3479	-0.4826	0.20503	0.24616	0.13653	0.24806	0.781	passed	9198	none	none
RRP12	-0.061197	0.24548	0.11354	0.20522	0.037268	-0.15215	0.203	passed	9198	none	none
OR51B5	-0.29848	-0.0071746	0.19726	0.13565	0.07413	0.063715	0.06	passed	9198	none	none
RPL14	0.12996	0.064711	-0.089807	-0.21071	-0.070407	0.050151	0.842	passed	9198	none	none
PAQR6	0.11486	-0.20461	0.006801	0.17941	0.12585	0.34616	0.061	passed	9198	none	none
C8orf76	-0.021424	0.22359	0.071104	0.12785	-0.093382	-0.24681	0.554	passed	9198	none	none
FCGBP	-0.16867	-0.027967	0.065545	0.022372	0.062346	0.16529	0.368	passed	9198	none	none
GNAT1	-0.093946	0.07094	0.051631	-0.087573	-0.14583	-0.33297	0.226	passed	9198	none	none
MED14	-0.14663	-0.066649	0.17572	0.19993	0.10919	-0.0063143	NA	passed	9198	none	none
TKTL1	-0.26001	-0.046668	-0.079524	0.31215	-0.077192	0.20102	NA	passed	9198	none	none
SUPT3H	0.21536	0.034487	-0.22635	0.015708	-0.1053	0.23743	0.062	passed	9198	none	none
EVA1A	0.11156	0.115	0.25349	0.069283	-0.083141	-0.21673	0.335	passed	9198	none	none
SMYD2	-0.22915	0.061854	0.15043	0.028032	-0.104	0.060192	0.842	passed	9198	none	none
HCN4	-0.39211	-0.25676	0.36467	0.3281	0.19239	0.51413	0.971	passed	9198	none	none
CKB	-0.32004	0.020765	0.60936	0.46338	-0.087442	-0.033148	0.7	passed	9198	hit	none
FGFR1OP	-0.23867	0.069217	0.16837	0.074512	0.030715	0.24516	0.964	passed	9198	none	none
L3MBTL1	-0.41791	0.15575	0.53117	0.309	-0.15506	-0.43787	0.168	passed	9198	hit	none
POU6F2	0.0085579	-0.18855	-0.080035	0.12624	0.091709	0.34805	0.67	passed	9198	none	none
PIK3C2B	-0.05425	0.13951	0.12617	0.04983	-0.014355	0.15868	0.925	passed	9198	none	none
GTF2H5	-0.20611	-0.18931	0.054165	0.19581	0.074298	0.44695	0.566	passed	9198	none	none
CWC25	-0.17524	-0.1086	0.1522	0.023082	-0.023369	-0.12043	0.318	passed	9198	none	none
ZNF701	0.16747	0.098556	-0.067452	-0.11591	-0.015323	0.013125	0.197	passed	9198	none	none
ERVFRD-1	-0.010084	-0.18558	-0.029747	-0.18055	0.021814	0.17777	0.247	passed	9198	none	none
DHX32	-0.018446	-0.060378	0.16762	-0.030354	0.19717	0.092315	0.923	passed	9198	none	none
N4BP2L2	0.12694	-0.064002	-0.22888	0.014357	0.23197	-0.034475	0.308	passed	9198	none	none
RGS21	0.032896	0.051564	-0.20914	0.24358	-0.0087765	0.040431	NA	passed	9198	none	none
BTN2A1	-0.10175	0.0047519	0.20791	0.046862	-0.08191	0.021544	0.084	passed	9198	none	none
PEX12	0.11889	0.10659	-0.062665	0.20088	-0.20035	-0.10732	0.125	passed	9198	none	none
TMEM208	0.010281	-0.029313	0.028082	0.24258	-0.058395	-0.18164	0.107	passed	9198	none	none
POLD3	0.11087	-0.15261	0.039474	0.15868	-0.062114	0.037031	0.593	passed	9198	none	none
DEFB128	0.14103	-0.023799	-0.12482	0.030787	-0.28186	-0.15282	NA	passed	9198	none	none
UBE2Z	0.047811	-0.10478	0.27925	0.10523	0.20811	0.35066	0.914	passed	9198	none	none
IFT57	-0.053748	0.070398	0.22347	0.021941	0.073706	-0.15306	0.148	passed	9198	none	none
CCDC71L	-0.20647	-0.095743	0.061667	0.20797	0.04853	0.16892	0.353	passed	9198	none	none
GOLGA2	-0.70338	-0.0068229	0.076377	0.5251	-0.12299	-0.22221	0.873	passed	9198	none	none
NARS	-0.38548	-0.015764	0.37492	0.28137	-0.057379	0.024236	0.68	passed	9198	none	none
C14orf79	-0.22124	-0.080865	0.11011	-0.058283	-0.066529	-0.34708	0.259	passed	9198	none	none
MAP6D1	-0.23101	-0.12833	0.49258	0.012582	0.17507	0.16841	0.287	passed	9198	hit	none
SPG20	-0.059717	-0.18922	0.1488	0.024299	0.29787	0.2142	0.151	passed	9198	none	hit
SYNC	-0.30455	-0.22633	0.20517	0.023542	-0.17595	0.022055	0.451	passed	9198	none	none
EFCAB8	0.2541	0.10305	-0.072665	-0.014605	-0.22084	0.15048	0.111	passed	9198	none	none
TEAD1	-0.135	0.10679	0.18623	0.22432	-0.10649	-0.15999	0.993	passed	9198	none	none
SEC61A2	-0.16443	0.20111	-0.19853	0.023201	-0.08535	-0.16204	0.526	passed	9198	none	none
SLC45A4	-0.76837	-0.65034	0.37143	0.15659	0.28476	0.12993	0.76	passed	9198	none	hit
USP6	-0.56354	-0.1508	0.27061	0.23214	-0.068859	-0.21765	0.618	passed	9198	none	none
TMEM163	-0.19863	-0.010726	-0.042868	-0.1181	0.29567	0.10026	0.307	passed	9198	none	hit
ELK1	-0.20518	0.067971	0.17291	0.025657	-0.027839	-0.18636	NA	passed	9198	none	none
TRIM37	-0.24693	-0.45703	-0.84203	0.15106	-0.62766	0.16193	0.357	passed	9198	none	none
TIMM23	-0.071682	0.064367	0.051278	-0.013685	-0.0059955	0.041533	0.078	passed	9198	none	none
LLPH	-0.39447	-0.24067	0.33806	0.62188	0.16423	0.11623	0.278	passed	9198	none	none
GCNA	-0.24047	-0.040992	0.096824	0.32352	-0.082724	0.013247	NA	passed	9198	none	none
EIF2D	-0.074855	0.04685	-0.0068705	0.054456	-0.090058	-0.082838	0.416	passed	9198	none	none
MATN4	-0.25585	0.16966	0.20503	0.17311	-0.12489	-0.18295	0.222	passed	9198	none	none
HBS1L	-0.41841	-0.086046	0.40948	0.33728	-0.06394	0.34845	0.79	passed	9198	none	none
SARS	0.10886	-0.27911	0.023352	-0.44616	0.2919	0.13722	0.647	passed	9198	none	hit
LOC283357	-0.032713	-0.068556	-0.25365	0.0054735	-0.18793	-0.1467	NA	passed	9198	none	none
ZNF84	-0.223	0.13562	0.18404	0.27588	-0.30708	-0.080161	0.381	passed	9198	none	none
TRIM24	-0.46701	-0.22376	0.28447	0.24948	0.083822	-0.074104	0.994	passed	9198	none	none
PDLIM7	-0.055135	0.15674	-0.24752	-0.41258	-0.12397	-0.071344	0.614	passed	9198	none	none
DLGAP3	-0.15429	-0.26267	0.11554	0.34147	0.018381	0.14905	0.942	passed	9198	none	none
SLC13A2	-0.60954	-0.25026	0.57714	0.51053	0.26679	0.22641	0.376	passed	9198	none	none
C2	-0.15425	0.11149	0.11688	0.076237	-0.098316	-0.026762	0.395	passed	9198	none	none
MYL7	-0.019815	0.068006	-0.02912	0.041827	-0.0279	-0.049773	0.382	passed	9198	none	none
ESYT3	0.1314	-0.098238	0.21025	0.064916	0.27213	0.099044	0.12	passed	9198	none	hit
ZNF559-ZNF177	0.20351	-0.16184	-0.33042	0.011844	0.10567	0.25956	NA	passed	9198	none	none
NBEAL1	-0.014239	-0.24057	-0.67843	0.057669	-0.37264	0.19363	0.302	passed	9198	none	none
NIPSNAP3A	-0.10487	-0.054156	0.022041	0.17639	-0.0070152	-0.17528	0.381	passed	9198	none	none
BBOX1	-0.12676	-0.1859	0.050887	0.27681	0.035244	0.15422	0.386	passed	9198	none	none
LOC284108	-0.11157	-0.14837	0.050375	0.15827	-0.055024	0.33211	NA	passed	9198	none	none
GLDN	-0.10584	0.0058048	0.1651	0.14828	0.02685	-0.11856	0.341	passed	9198	none	none
MOCS3	0.050336	0.12575	0.072046	0.093865	-0.15407	-0.10757	0.476	passed	9198	none	none
DBX2	-0.45786	-0.065412	0.00033785	-0.025412	0.02959	0.0096467	0.086	passed	9198	none	none
EIF4EBP2	-0.16466	0.21655	0.21192	0.20165	-0.23189	0.10387	0.396	passed	9198	none	none
KRTDAP	-0.80063	-0.074621	0.66214	0.40407	0.092995	-0.32744	0.346	passed	9198	hit	none
DHRS7C	0.0056138	-0.063032	0.015812	-0.22736	0.15206	-0.11655	0.248	passed	9198	none	none
MS4A5	-0.057712	0.0040642	-0.041229	0.0066413	0.060315	-0.35537	0.025	passed	9198	none	none
C12orf54	0.046405	-0.14167	0.024257	-0.16256	-0.055797	0.06178	0.066	passed	9198	none	none
C15orf59	0.1081	0.0081632	0.14079	0.13491	0.087881	-0.063467	0.667	passed	9198	none	none
WNT6	-0.44776	-0.19283	0.44626	0.60733	0.12405	0.4829	0.897	passed	9198	none	none
CFAP69	-0.24014	0.24795	0.14502	-0.065802	-0.18689	-0.11928	NA	passed	9198	none	none
WDR1	-0.47681	-0.014525	0.31411	0.077122	0.044347	0.0017325	0.981	passed	9198	none	none
GLT1D1	-0.33879	-0.021424	0.14122	-0.032596	0.076157	0.030536	0.824	passed	9198	none	none
LATS1	-0.74665	0.024381	0.65598	0.55161	-0.18812	-0.0064643	0.98	passed	9198	none	none
PELI1	-0.22996	0.062668	0.10061	0.20935	-0.0091032	0.16778	0.758	passed	9198	none	none
LONRF2	-0.061769	-0.17461	0.12753	0.16679	0.06417	-0.0073753	0.148	passed	9198	none	none
LOC157562	-0.06459	-0.069664	-0.014982	-0.062543	-0.0082261	-0.14544	NA	passed	9198	none	none
CUL2	0.30267	-0.0019428	-0.059443	-0.072801	0.16734	0.20355	0.959	passed	9198	none	none
C1QBP	-0.19002	-0.39688	0.021113	0.24073	0.095221	0.024452	0.581	passed	9198	none	none
GPR22	0.042958	-0.056985	-0.083979	0.26478	-0.060051	-0.14522	0.081	passed	9198	none	none
SURF2	0.1053	-0.028609	-0.020196	-0.16207	0.084899	0.10094	0.312	passed	9198	none	none
LCOR	-0.054138	-0.69172	0.57159	0.26118	0.21488	-0.12289	0.823	passed	9198	hit	none
PC	-0.088762	-0.032617	-0.27418	0.20303	-0.10907	0.058399	0.461	passed	9198	none	none
TCEANC2	-0.10418	0.045231	-0.032596	0.042336	-0.29968	0.1342	0.365	passed	9198	none	none
TKFC	0.19672	-0.03811	0.039359	0.128	-0.036435	0.18087	NA	passed	9198	none	none
SH3RF3	-0.22493	-0.13083	0.45111	0.085756	-0.0050096	0.29141	0.289	passed	9198	none	none
DOCK1	-0.96481	-0.48594	0.29397	0.7795	0.18497	-0.26234	0.985	passed	9198	none	none
ADAM22	-0.2128	0.078024	-0.019632	0.035173	-0.34001	-0.10913	0.504	passed	9198	none	none
CFAP46	-0.92126	-0.43731	0.27406	0.55059	0.10581	-0.08489	NA	passed	9198	none	none
LYAR	-0.22526	0.011018	-0.13258	0.17946	-0.055822	-0.22688	0.79	passed	9198	none	none
FGFR1OP2	-0.26675	-0.1761	-0.036904	0.040962	-0.098963	-0.12675	0.274	passed	9198	none	none
EXOC8	-0.19815	-0.06711	-0.08183	0.20021	-0.10604	0.25374	0.746	passed	9198	none	none
LRRC4B	-0.24665	-0.068467	0.12966	0.083312	-0.12916	0.11758	0.751	passed	9198	none	none
VPS37A	-0.16274	-0.022294	0.26128	0.29605	0.19999	0.048884	0.662	passed	9198	none	none
LRRC55	-0.09481	-0.032184	-0.026224	-0.18173	-0.047642	0.042753	0.141	passed	9198	none	none
GEMIN8	0.04609	-0.069507	0.10297	-0.025157	0.034731	-0.14342	NA	passed	9198	none	none
ADSL	-0.095798	0.024174	-0.07986	-0.10511	-0.25846	0.13214	0.779	passed	9198	none	none
FLRT3	-0.078574	-0.14478	-0.35607	-0.10054	0.16511	0.074765	0.561	passed	9198	none	none
C14orf105	-0.23222	-0.070476	0.21845	0.19503	0.047116	-0.20996	0.175	passed	9198	none	none
VGLL4	-0.28827	0.04234	-0.14732	-0.20927	-0.20764	-0.22152	0.67	passed	9198	none	none
CFB	-0.28129	0.047428	-0.021845	0.24738	-0.19341	-0.0099143	0.58	passed	9198	none	none
STARD10	-0.5628	0.12225	0.58357	0.60373	-0.10045	-0.059523	0.145	passed	9198	none	none
CLDN7	0.13639	0.054133	-0.28247	-0.2422	0.044644	0.079575	0.644	passed	9198	none	none
NKX2-8	-0.639	-0.16803	0.3215	0.056747	-0.11702	0.25115	0.664	passed	9198	none	none
CDC14B	-0.13464	-0.43083	-0.06089	0.13146	0.044865	0.3989	0.671	passed	9198	none	none
PKN3	-0.5661	0.036908	0.31793	0.25916	0.082915	-0.062422	0.447	passed	9198	none	none
ARR3	-0.5547	0.015057	0.30611	0.33846	-0.053547	0.13226	NA	passed	9198	none	none
BBX	-0.14519	-0.00040779	0.23212	0.044565	0.059355	-0.039349	0.783	passed	9198	none	none
ALDH1B1	0.072508	-0.055432	-0.12554	-0.34774	0.11536	-0.19347	0.273	passed	9198	none	none
RAB25	-0.17697	0.057476	0.16484	-0.032187	-0.077809	-0.0069542	0.308	passed	9198	none	none
DSPP	0.15938	0.012415	-0.24545	0.0079392	-0.09315	0.11431	0.097	passed	9198	none	none
LIPN	0.21611	0.15343	-0.24309	-0.16655	-0.076135	0.088593	0.313	passed	9198	none	none
ASCL3	0.090317	-0.16459	-0.15744	-0.36107	0.12816	0.17278	0.086	passed	9198	none	none
CYP2B6	-0.072408	-0.28222	-0.24602	0.012653	0.071546	0.23444	0.251	passed	9198	none	none
SPSB4	-0.16608	-0.10811	0.10197	-0.16615	-0.16543	-0.017661	0.345	passed	9198	none	none
GRAP	-0.14454	-0.068047	-0.2262	0.18719	-0.32368	-0.075405	0.181	passed	9198	none	none
ITPKC	-0.25937	0.089485	0.0077379	0.11513	0.029095	0.04237	0.363	passed	9198	none	none
KRT74	-0.11012	-0.27858	-0.33525	-0.32418	0.038022	0.23566	0.095	passed	9198	none	none
ADH7	-0.18488	0.13858	0.1903	-0.075146	-0.11798	-0.21238	0.055	passed	9198	none	none
TRMT1L	-0.07494	-0.021574	0.069685	-0.32442	-0.092525	-0.26434	0.859	passed	9198	none	none
PCDHB3	0.0024746	-0.064145	-0.053584	-0.14392	0.31775	0.24275	0.053	passed	9198	none	hit
CD6	0.061894	-0.052911	0.049384	0.06663	0.04328	0.051239	0.164	passed	9198	none	none
CCDC74B	0.044926	-0.0078654	0.12395	-0.063822	0.20331	0.079038	0.122	passed	9198	none	none
WDR55	0.25647	-0.043182	-0.71141	-0.39863	-0.17286	0.02196	0.242	passed	9198	none	none
RBM38	-0.52664	-0.062269	0.74254	0.47185	0.25826	-0.1232	0.656	passed	9198	hit	none
BTBD11	-0.37391	0.035021	0.11572	0.034718	-0.13295	0.14947	0.935	passed	9198	none	none
OXTR	-0.050836	0.14724	-0.24443	0.096342	-0.16253	-0.20867	0.538	passed	9198	none	none
GPBAR1	0.0014755	0.14275	-0.26762	-0.32211	0.29492	0.44095	0.155	passed	9198	none	none
SLC9A3R2	-0.22716	-0.30281	-0.01653	0.30707	-0.053941	-0.021149	0.391	passed	9198	none	none
JAZF1	-0.17506	-0.24574	0.31627	0.08856	0.19732	-0.033834	0.931	passed	9198	none	none
RBM5	-0.077955	0.091355	0.41443	0.072477	0.01772	0.30097	0.796	passed	9198	none	none
RAB42	-0.61573	-0.47003	-0.32591	0.35161	-0.31027	0.46778	0.238	passed	9198	none	none
TARP	-0.15112	-0.14896	0.12434	-0.081864	0.18593	0.010891	NA	passed	9198	none	none
TCN2	-0.05129	-0.067946	0.0076913	0.0078785	0.014741	-0.1188	0.257	passed	9198	none	none
PPP1R1B	-0.072907	0.18676	0.0030644	0.13522	-0.30697	0.063117	0.471	passed	9198	none	none
RBM12B	-0.10515	-0.19102	0.13959	0.16555	0.25468	0.019796	0.357	passed	9198	none	none
NEK10	-0.015548	0.031232	0.12355	0.050272	-0.047303	0.11978	0.279	passed	9198	none	none
PAIP2B	-0.56697	-0.16647	-0.047798	0.3491	-0.15563	0.1881	0.172	passed	9198	none	none
MPL	-0.6949	-0.20339	0.59877	0.49148	0.12374	0.077494	0.147	passed	9198	hit	none
WWTR1	-0.1263	-0.0090963	0.23996	0.39821	0.12923	-0.063202	0.931	passed	9198	none	none
MCRIP2	-0.12678	0.047328	0.16484	-0.023861	0.0048164	0.10851	NA	passed	9198	none	none
MCM9	0.069371	-0.072285	-0.019779	0.15054	-0.11567	0.090108	0.64	passed	9198	none	none
COL4A3	-0.26307	-0.18216	0.22991	0.36555	0.039492	0.063931	0.903	passed	9198	none	none
ASXL3	0.0058492	0.044679	0.17504	0.093832	-0.13187	-0.11236	0.969	passed	9198	none	none
SCARF2	-0.43872	-0.025566	-0.060891	0.27179	0.050928	-0.14847	0.949	passed	9198	none	none
OR6P1	-0.0099808	-0.020516	-0.15385	0.10628	0.0048336	-0.17094	NA	passed	9198	none	none
LTC4S	-0.30314	0.018215	-0.02086	0.15459	-0.35555	-0.041915	0.283	passed	9198	none	none
LOC105377134	-0.10933	-0.022337	-0.036068	-0.0031911	-0.037834	-0.019366	NA	passed	9198	none	none
ZNF260	0.18764	-0.033063	-0.15034	-0.10313	-0.0014271	-0.096341	0.068	passed	9198	none	none
TRAF1	-0.14884	-0.3258	-0.28446	0.26812	-0.21746	0.36211	0.754	passed	9198	none	none
HIST1H4A	0.25108	0.053031	-0.14114	-0.088231	-0.09561	0.11921	0.245	passed	9198	none	none
NOMO3	0.046477	0.041637	-0.37791	0.30777	-0.15979	0.052901	0.34	passed	9198	none	none
RFC4	-0.0019245	0.054876	-0.021992	-0.18044	-0.051034	0.22596	0.683	passed	9198	none	none
NFKBIB	-0.15016	-0.15641	-0.15243	0.13289	0.030146	0.3032	0.263	passed	9198	none	none
ATP6V1F	-0.013366	0.11399	-0.17187	0.043413	-0.16933	-0.07806	0.152	passed	9198	none	none
GNB4	0.38285	0.05207	-0.24222	0.22939	-0.070782	-0.069669	0.929	passed	9198	none	none
SLC25A27	0.024894	-0.010645	-0.0069479	-0.060676	-0.053296	-0.26933	0.282	passed	9198	none	none
ENO2	0.11668	-0.099841	-0.016355	0.18114	0.16467	-0.059178	0.539	passed	9198	none	none
FANCL	-0.20749	-0.12142	0.11439	0.50482	0.067039	0.072311	0.775	passed	9198	none	none
SLC9B2	-0.68329	-0.18694	0.27326	0.17731	0.016561	0.27415	0.155	passed	9198	none	none
FRA10AC1	-0.041224	0.135	-0.082687	0.1718	0.014603	-0.015747	0.359	passed	9198	none	none
TEX43	0.046038	-0.20273	-0.23843	-0.47502	0.027222	0.2795	NA	passed	9198	none	none
CFAP44	-0.21508	-0.023878	0.13776	0.28521	-0.3722	-0.21362	NA	passed	9198	none	none
DGAT2	-0.41667	-0.015436	-0.59818	0.18613	-0.042727	-0.15881	0.406	passed	9198	none	none
KIF14	-0.72196	-0.64276	0.15106	0.4816	-0.035818	0.083185	0.516	passed	9198	none	none
TRPV2	-0.12397	-0.017923	-0.095878	0.048034	-0.40392	-0.012707	0.672	passed	9198	none	none
PRAMEF17	-0.18218	-0.19909	-0.11733	-0.02471	0.023837	0.14022	0.052	passed	9198	none	none
POLR1A	0.31965	0.0082156	-0.41285	-0.31764	-0.036304	0.089009	0.975	passed	9198	none	none
SLC16A6	0.1972	-0.10221	0.071698	0.26645	-0.0079204	0.030593	0.708	passed	9198	none	none
NRIP1	-0.42337	-0.15597	-0.019811	0.13026	-0.29068	-0.039363	0.9	passed	9198	none	none
NODAL	-0.1484	-0.16902	-0.01616	-0.034257	-0.13342	-0.26975	0.769	passed	9198	none	none
SERP1	-0.082418	-0.1418	-0.016336	0.021806	0.20628	0.21617	0.594	passed	9198	none	none
SWT1	0.17794	-0.05825	-0.088398	-0.31246	0.017024	0.43544	0.883	passed	9198	none	none
FZD9	0.086423	-0.34424	-0.22661	-0.084376	0.33832	0.052632	0.207	passed	9198	none	hit
FNBP1	-0.13271	-0.085968	0.06	0.22873	0.021292	-0.1783	0.93	passed	9198	none	none
ABCB1	-0.49241	-0.47972	2.6371	0.37168	2.054	0.44808	0.7	passed	9198	hit	none
SLC2A4	-0.10558	-0.098573	0.12029	0.062036	-0.32521	0.10296	0.741	passed	9198	none	none
ZNF627	-0.089598	-0.08527	0.1376	-0.2614	0.1067	0.1145	0.147	passed	9198	none	none
FAXC	-0.33886	-0.045225	0.30952	0.47624	0.011897	0.1319	0.562	passed	9198	none	none
OR4S1	0.016509	-0.049201	0.052734	-0.096788	0.032642	0.11844	NA	passed	9198	none	none
SPIN2B	-0.29201	0.082967	0.20804	0.13261	0.084162	0.25312	NA	passed	9198	none	none
LDB3	-0.93719	-0.20816	0.71053	0.75799	0.040934	0.37425	0.824	passed	9198	none	none
TMEM164	-0.43095	-0.37152	0.16548	-0.013947	0.096792	-0.15795	NA	passed	9198	none	none
MUS81	-0.013994	0.038169	-0.098116	0.0025057	0.016096	0.10947	0.172	passed	9198	none	none
PWP1	-0.19795	0.10021	0.20794	0.25131	0.047195	0.026654	0.369	passed	9198	none	none
PFN2	0.17183	-0.1161	-0.22373	-0.053108	0.16516	0.38881	0.804	passed	9198	none	none
KIF4A	-0.40726	-0.087043	0.39113	0.18369	0.29627	0.11083	NA	passed	9198	none	hit
BRDT	-0.069643	-0.023289	0.20632	0.13679	-0.15575	0.26702	0.079	passed	9198	none	none
ANXA6	-0.29842	0.10213	0.1994	0.13971	-0.10229	-0.090062	0.513	passed	9198	none	none
LEFTY1	-0.68876	-0.083975	0.30612	0.79709	-0.24137	-0.20388	0.286	passed	9198	none	none
NTPCR	-0.55742	-0.11675	0.31093	0.6039	0.082422	0.1136	0.763	passed	9198	none	none
ZNF433	-0.12746	0.10069	0.033747	0.066616	-0.24667	-0.17332	0.134	passed	9198	none	none
PTK6	-0.050162	-0.072097	-0.09177	0.13995	0.14284	0.31182	0.795	passed	9198	none	none
MOGAT2	0.13613	-0.043244	-0.28079	-0.066441	-0.00084761	0.024669	0.259	passed	9198	none	none
CAMK4	-0.34709	-0.24897	0.50044	0.28565	0.21059	0.1921	0.361	passed	9198	hit	none
NSMCE1	-0.50597	-0.023029	0.45586	0.70524	0.25337	0.18679	0.235	passed	9198	none	none
RSPH1	-0.22789	0.008644	-0.0065133	0.25713	0.15989	0.12504	0.491	passed	9198	none	none
ZBED2	-0.19797	-0.017661	0.15984	0.19691	-0.24324	0.33163	0.155	passed	9198	none	none
NOC2L	-0.056555	0.14819	0.0038968	0.18296	-0.15772	-0.35957	0.323	passed	9198	none	none
ZNF645	0.12563	0.14876	-0.20827	-0.55458	-0.10987	-0.34612	NA	passed	9198	none	none
TEAD2	0.13385	0.1477	-0.060096	-0.22712	-0.0036752	0.024506	0.796	passed	9198	none	none
BCL2L15	-0.1191	-0.12596	-0.067682	0.074769	0.0086213	-0.14847	0.079	passed	9198	none	none
MATN3	-0.31194	-0.13413	0.030225	0.15721	0.01797	0.22009	0.747	passed	9198	none	none
MLLT3	-0.22527	-0.25716	-0.19297	-0.32144	-0.34196	-0.0036578	0.991	passed	9198	none	none
CD99L2	-0.44311	-0.25978	-0.030889	0.19463	-0.33665	0.035796	NA	passed	9198	none	none
PIP5KL1	-0.0037797	-0.13588	0.071998	0.12734	-0.029449	0.30014	0.322	passed	9198	none	none
MAZ	-0.0094482	-0.28791	-0.26445	-0.1338	-0.25706	-0.18255	0.608	passed	9198	none	none
TSSC4	0.085149	-0.02739	-0.031316	0.13331	0.14174	0.17462	0.203	passed	9198	none	none
DCAF10	-0.28545	-0.24361	0.0084319	0.27794	-0.03339	0.19013	0.859	passed	9198	none	none
CLOCK	-0.12905	-0.027385	0.099893	-0.29013	0.072971	0.13475	0.832	passed	9198	none	none
MET	-0.0092771	0.12417	-0.022881	-0.060905	-0.074501	-0.2124	0.988	passed	9198	none	none
TMEM250	-0.60821	-0.46992	0.4842	0.57271	0.077633	-0.076754	NA	passed	9198	none	none
AHCTF1	-0.18386	-0.041667	0.15366	0.084295	-0.40313	-0.13709	0.972	passed	9198	none	none
SSX1	0.17585	0.018091	-0.12745	0.023025	-0.053993	-0.013596	NA	passed	9198	none	none
CFAP70	-0.11647	-0.25349	-0.11555	-0.03654	0.091992	0.086966	NA	passed	9198	none	none
EML3	-0.17187	-0.22485	-0.14643	0.12136	-0.02088	0.18569	0.466	passed	9198	none	none
PIH1D2	-0.29741	-0.087628	0.33823	-0.093987	0.049834	0.32249	0.215	passed	9198	none	none
TNFRSF17	-0.18229	0.0071808	0.031196	0.12652	-0.011427	-0.25944	0.136	passed	9198	none	none
PAK6	-0.0035372	0.075133	-0.024591	0.02107	-0.2284	-0.084149	0.288	passed	9198	none	none
PTPRE	0.045231	-0.10537	0.20679	0.35328	0.19917	0.16381	0.897	passed	9198	none	none
ZBTB2	-0.41948	-0.5338	-0.15364	0.0047143	-0.098774	0.51637	0.983	passed	9198	none	none
MSMP	-0.16929	-0.21827	0.2644	0.011833	0.10058	0.11571	0.423	passed	9198	none	none
COLCA2	-0.09247	-0.21227	0.20173	-0.04114	0.1751	0.30169	0.94	passed	9198	none	none
WDR12	-0.17822	-0.097909	0.031408	-0.050696	0.15438	-0.044837	0.623	passed	9198	none	none
OGFOD2	-0.085287	0.085163	0.080092	-0.069265	-0.21954	0.12939	0.204	passed	9198	none	none
FEZF1	0.10457	-0.22403	0.20048	0.098848	0.095481	0.25908	0.989	passed	9198	none	none
GPN2	-0.091337	-0.12375	0.12934	-0.097255	0.037192	0.032555	0.256	passed	9198	none	none
AMDHD1	-0.15427	0.043811	0.030207	-0.10977	0.14704	-0.16591	0.581	passed	9198	none	none
MARCH8	0.065915	-0.30667	-0.26951	-0.1304	0.22177	0.33111	0.172	passed	9198	none	none
HILPDA	-0.25376	-0.058652	0.37073	0.37349	0.031476	0.28714	0.196	passed	9198	none	none
LOC100129216	0.24881	0.15991	-0.16862	0.11346	-0.14185	-0.043626	NA	passed	9198	none	none
ADGRE1	-0.10997	-0.020044	0.083442	0.082557	-0.020393	-0.15901	NA	passed	9198	none	none
MAP1LC3B	-0.076039	-0.27963	-0.37901	0.13405	-0.060138	0.21096	0.742	passed	9198	none	none
FITM1	0.1915	-0.05363	-0.12951	-0.039988	-0.015859	0.20052	0.24	passed	9198	none	none
CGB5	-0.44766	0.17531	0.21248	0.47132	-0.29705	-0.12109	0.067	passed	9198	none	none
GRPR	0.055688	0.24386	-0.69577	-0.2193	-0.32106	-0.19814	NA	passed	9198	none	none
TNP1	-0.0044016	0.11961	-0.12688	-0.041868	-0.084841	-0.066535	0.38	passed	9198	none	none
ALAS2	-0.35337	-0.29363	-0.044606	-0.093365	-0.27914	0.33776	NA	passed	9198	none	none
UGT2A1	-0.21452	-0.12165	0.041906	-0.063309	-0.083298	0.10429	0.01	passed	9198	none	none
G6PC2	0.17976	-0.2451	-0.13681	0.46996	-0.2052	0.32356	0.239	passed	9198	none	none
AKR1C3	-0.077173	-0.089858	0.37777	0.11923	0.013502	0.33396	0.164	passed	9198	none	none
MCTP1	-0.022673	-0.24199	-0.22549	-0.042659	0.023933	0.27591	0.393	passed	9198	none	none
DNAJC7	-0.07871	-0.024709	-0.4061	0.177	0.089739	0.17385	0.804	passed	9198	none	none
CDNF	-0.19204	-0.1211	0.073726	0.32157	0.028486	0.25645	0.775	passed	9198	none	none
PNPLA7	0.31923	0.031735	-0.12762	-0.1256	0.046179	-0.10756	0.399	passed	9198	none	none
KLRC4	0.029192	-0.13209	-0.18806	-0.41781	0.18876	0.57343	0.1	passed	9198	none	none
KDELC2	-0.17081	-0.096679	0.13106	0.18611	0.11576	-0.28881	0.612	passed	9198	none	none
PNMA8A	-0.0051298	-0.00526	0.049221	-0.30898	0.10721	0.20486	NA	passed	9198	none	none
STIP1	-0.082797	0.12261	0.074355	0.19213	-0.053684	-0.058993	0.599	passed	9198	none	none
NEK1	-0.18709	0.0034061	-0.052178	0.16192	-0.068959	-0.047927	0.809	passed	9198	none	none
C5orf67	-0.12983	-0.084984	-0.33474	0.14721	-0.18109	-0.10999	NA	passed	9198	none	none
DMXL2	-0.327	-0.24155	0.31488	0.31429	0.11962	0.34877	0.916	passed	9198	none	none
MSH4	0.017042	0.0068326	0.19661	0.1294	0.035944	0.19017	0.252	passed	9198	none	none
CLECL1	0.059919	0.10205	0.012795	0.38091	-0.2402	-0.19249	0.212	passed	9198	none	none
HCFC1	-0.48184	0.13144	0.25374	0.065945	-0.14261	0.34107	NA	passed	9198	none	none
NEU4	0.2277	0.070306	-0.38953	-0.17168	-0.16812	0.10039	0.613	passed	9198	none	none
ADGRL2	0.15694	0.069054	-0.18275	-0.095473	0.13575	0.11058	NA	passed	9198	none	none
MYPOP	-0.079565	-0.16285	-0.13401	0.25334	-0.12647	0.11655	0.34	passed	9198	none	none
PLA2G10	-0.012211	-0.085476	-0.43265	-0.20883	-0.28549	0.092832	0.225	passed	9198	none	none
CAMSAP3	-0.67338	-0.25956	-0.42995	0.27514	-0.53809	0.15243	0.939	passed	9198	none	none
FBXO11	0.11456	0.068188	0.19403	-0.15905	0.21462	0.0022801	0.997	passed	9198	none	none
ZNF341	-0.3549	-0.023502	0.32344	0.18845	-0.085994	0.10732	0.052	passed	9198	none	none
PA2G4	-0.024808	-0.32758	0.1364	0.085802	-0.022567	0.096027	0.787	passed	9198	none	none
SLC2A13	-0.36534	0.047514	0.087635	0.32773	-0.1303	-0.0055757	0.269	passed	9198	none	none
VCX2	-0.068653	0.13784	-0.10359	-0.32899	-0.05296	-0.32495	NA	passed	9198	none	none
PAPSS2	-0.67971	-0.58228	-0.11982	-0.33146	0.29982	0.49725	0.801	passed	9198	none	none
SORCS1	-0.49414	-0.64446	-0.19074	0.066075	0.12122	0.21539	0.94	passed	9198	none	none
TBCE	-0.63777	0.0033054	0.17575	0.58928	-0.35818	0.24092	0.344	passed	9198	none	none
PDP2	0.01599	-0.1917	0.0033375	-0.36228	0.19075	-0.074728	0.088	passed	9198	none	none
CILP	-0.017443	-0.03181	-0.39332	-0.04224	-0.14537	0.26745	0.372	passed	9198	none	none
LETM1	0.084269	0.015361	-0.11728	-0.13098	-0.016991	0.42183	0.607	passed	9198	none	none
FLOT2	0.18461	-0.22464	-0.2275	-0.20724	0.19328	0.24245	0.193	passed	9198	none	none
NPFFR2	-0.06104	-0.42243	-0.30379	-0.42715	0.32902	0.39165	0.023	passed	9198	none	none
CHST12	-0.20755	-0.11267	0.15856	0.32533	0.07472	0.25487	0.2	passed	9198	none	none
OR5AR1	0.050769	-0.0051074	0.047777	-0.12451	0.069519	0.10121	NA	passed	9198	none	none
ERBB3	-0.05857	-0.2252	-0.42143	-0.16997	-0.14248	-0.035756	0.672	passed	9198	none	none
KLKB1	0.0098796	-0.041418	-0.28844	-0.14518	0.094886	-0.18558	0.279	passed	9198	none	none
TPM4	0.016376	-0.15627	-0.17508	0.015695	-0.14197	0.066456	0.578	passed	9198	none	none
KRT15	-0.072197	-0.03814	0.12358	0.26418	0.063453	0.20683	0.327	passed	9198	none	none
NOS1AP	0.22846	0.078737	-0.15049	-0.29209	-0.1298	-0.087461	0.495	passed	9198	none	none
WNT10A	0.14527	-0.11519	-0.088791	-0.098275	-0.10757	0.095895	0.649	passed	9198	none	none
OR51V1	-0.18881	0.045805	0.11125	-0.052476	0.17382	-0.17227	NA	passed	9198	none	none
FAM9A	-0.66265	-0.085422	-0.072657	0.58677	-0.28403	0.21876	NA	passed	9198	none	none
C3orf62	-0.063413	0.024477	-0.011881	0.010704	-0.10347	-0.10434	0.058	passed	9198	none	none
TMEM5	-0.10863	0.10641	-0.13128	-0.068204	-0.2982	-0.17357	0.272	passed	9198	none	none
CCPG1	-0.55635	-0.10102	-0.45556	-0.058716	-0.30343	0.055544	0.367	passed	9198	none	none
TMEM168	-0.0094264	-0.14509	-0.017638	-0.10368	0.089394	0.14094	0.331	passed	9198	none	none
KCNJ8	-0.19771	-0.25132	-0.19945	-0.12645	0.1141	0.2497	0.911	passed	9198	none	none
TEX26	-0.069415	-0.081087	0.40051	0.17973	0.23842	0.10949	0.034	passed	9198	none	none
SLC2A8	0.036221	0.031731	0.0067992	-0.058413	0.10238	0.074156	0.391	passed	9198	none	none
FBXW7	-0.05378	0.055754	-0.030711	0.042156	-0.22683	-0.067533	0.982	passed	9198	none	none
OR4F16	-0.21937	-0.019499	-0.089684	0.28625	-0.27683	-0.20733	0.078	passed	9198	none	none
CHRNA5	-0.034736	-0.096194	0.15968	0.31755	0.064385	0.18545	0.376	passed	9198	none	none
NXNL1	-0.014173	-0.025904	-0.066403	-0.11649	-0.051474	-0.13781	0.307	passed	9198	none	none
ARF6	-0.24737	-0.31658	-0.2931	0.36306	-0.16786	0.65928	0.357	passed	9198	none	none
RPL22L1	-0.08512	0.13807	0.029246	0.021281	-0.023984	-0.25189	0.661	passed	9198	none	none
FAM71C	-0.30941	-0.0020369	0.057883	0.49948	-0.13665	0.41229	0.085	passed	9198	none	none
OBSCN	-0.38036	0.025912	0.31622	0.15352	0.18608	0.073043	0.153	passed	9198	none	none
DNM1L	-0.22227	-0.13886	0.074275	-0.040088	-0.065615	0.16537	0.764	passed	9198	none	none
PRR20B	0.050136	0.14645	-0.046073	0.20007	-0.15881	-0.50468	0.075	passed	9198	none	none
RALBP1	-0.40243	0.14643	0.077747	-0.093768	-0.061886	0.036805	0.656	passed	9198	none	none
MUC3B	-0.030775	-0.15927	-0.2353	-0.24857	0.079367	0.0059668	NA	passed	9198	none	none
SOCS6	-0.51098	-0.568	0.30216	0.1882	0.34422	0.4307	0.963	passed	9198	none	none
ILF2	-0.21122	0.10006	0.15659	0.21642	0.13907	0.23822	0.747	passed	9198	none	none
USP4	-0.69653	-0.13318	0.28384	0.40703	-0.23004	0.29302	0.33	passed	9198	none	none
OR6Q1	0.041648	-0.060073	-0.043888	-0.32597	0.15641	-0.35654	NA	passed	9198	none	none
NKAIN4	-0.50783	-0.091732	0.56942	0.7577	0.19504	-0.1304	0.598	passed	9198	none	none
ADCYAP1	0.37393	0.034624	-0.27944	-0.49692	-0.21439	0.0044067	0.858	passed	9198	none	none
CDK6	-0.023004	-0.53601	0.25642	0.29826	0.25928	0.3007	0.986	passed	9198	none	none
AMIGO2	-0.58499	-0.37765	0.43642	0.19187	0.33491	0.1045	0.65	passed	9198	none	hit
FUT11	0.11042	0.11305	0.036479	-0.065168	-0.023796	0.049186	0.269	passed	9198	none	none
OASL	-0.2501	-0.23588	-0.17204	0.25846	0.11952	0.37063	0.219	passed	9198	none	none
ADCY9	-0.22591	0.030012	0.45003	0.35123	0.27746	0.0090305	0.947	passed	9198	none	hit
METAP2	0.23334	-0.098256	-0.28972	-0.26432	0.29255	0.33323	0.847	passed	9198	none	hit
VCAM1	0.10909	0.034818	-0.4452	-1.2873	-0.28237	-0.46536	0.705	passed	9198	none	none
CEL	0.023664	-0.023316	-0.22517	0.089391	0.0037408	0.065238	0.473	passed	9198	none	none
STK16	0.078104	-0.086309	0.037228	0.17993	0.087272	0.29598	0.243	passed	9198	none	none
SLITRK3	-0.15254	-0.13485	0.31021	0.075274	0.16679	0.27839	0.904	passed	9198	none	none
SUPT16H	-0.31566	-0.19466	0.049905	0.10869	0.1897	-0.34646	0.971	passed	9198	none	none
CSH1	-0.35138	-0.33997	0.02298	-0.0039003	0.14017	-0.14552	0.091	passed	9198	none	none
LOC100130451	-0.22662	-0.10217	0.17937	0.11363	-0.22332	0.02329	NA	passed	9198	none	none
NISCH	-0.16261	-0.0093413	-0.0077264	0.27521	-0.11902	0.23241	0.647	passed	9198	none	none
NCOA2	0.23631	0.14802	-0.0095613	-0.027022	-0.60821	-0.17146	0.994	passed	9198	none	none
ISL1	-0.13653	-0.0040755	-0.10221	-0.081124	-0.017889	-0.33739	0.955	passed	9198	none	none
B3GALT4	0.0934	0.13678	-0.012726	-0.13549	-0.11803	-0.040507	0.202	passed	9198	none	none
KCNV2	0.1034	0.15735	-0.13632	0.24944	-0.087602	-0.18376	0.68	passed	9198	none	none
RAPGEF5	-0.1971	-0.17144	0.078883	0.25279	0.067875	0.21771	0.979	passed	9198	none	none
ADH1B	0.16898	0.085698	0.046593	-0.10894	-0.016374	0.17685	0.161	passed	9198	none	none
PFDN5	0.22165	-0.015023	-0.055403	-0.20254	-0.045359	0.048552	0.111	passed	9198	none	none
IMPAD1	0.0063899	-0.10858	-0.14618	0.082357	0.0035087	0.12985	0.131	passed	9198	none	none
ZCCHC8	-0.0096142	-0.037691	-0.079608	-0.17848	-0.2227	-0.25471	0.949	passed	9198	none	none
NRAS	-0.054821	0.087545	0.19334	-0.36859	-0.11334	0.20935	0.536	passed	9198	none	none
KPNA5	-0.17399	-0.21526	-0.29051	0.0045666	0.016601	0.064612	0.336	passed	9198	none	none
EPAS1	-0.16653	0.054625	0.011686	0.26995	-0.18227	0.16406	0.94	passed	9198	none	none
DDX39A	0.031571	0.059275	-0.091629	0.16468	-0.027811	-0.07439	0.604	passed	9198	none	none
MYH11	-0.17654	-0.17781	-0.064096	0.29977	0.016517	0.24811	0.959	passed	9198	none	none
ZSWIM5	-0.3342	0.026121	0.1183	0.17291	-0.14282	-0.25021	0.649	passed	9198	none	none
SND1	-0.41961	-0.21896	0.033569	0.15762	-0.050808	0.39768	0.994	passed	9198	none	none
PCDH8	-0.16898	-0.074365	0.041247	0.072842	-0.12569	-0.32178	0.783	passed	9198	none	none
ZNF518B	-0.29332	-0.2437	0.18955	0.13063	0.24539	-0.048664	0.401	passed	9198	none	none
ZNF383	-0.044223	0.011891	0.14058	-0.023947	0.13611	0.10382	0.101	passed	9198	none	none
HORMAD1	-0.31429	-0.22252	0.44179	0.42716	0.079348	0.085866	0.162	passed	9198	none	none
CNGA4	-0.40081	0.012632	0.17975	0.28634	0.055267	0.15081	0.257	passed	9198	none	none
GMPR	-0.15098	-0.22717	-0.11273	-0.34675	0.077426	0.040066	0.481	passed	9198	none	none
CGB1	-0.099047	0.0047976	-0.028929	0.2386	0.11995	0.22511	0.071	passed	9198	none	none
UNC5B	-0.17388	-0.2473	0.096378	0.30427	0.24942	0.19754	0.519	passed	9198	none	none
OPA3	0.040419	-0.047379	0.077269	0.038713	-0.10585	-0.17079	0.418	passed	9198	none	none
UBB	0.00096726	-0.027045	-0.079383	0.03532	0.092118	0.26279	0.258	passed	9198	none	none
MGAT4A	-0.34774	0.14503	0.45304	0.32853	-0.064981	0.068814	0.157	passed	9198	hit	none
RHNO1	-0.066132	-0.163	-0.27573	-0.163	-0.012244	0.15643	0.861	passed	9198	none	none
FTSJ3	-0.32878	0.10677	0.027753	-0.10666	-0.223	0.048143	0.551	passed	9198	none	none
FOXE3	0.13412	-0.065733	-0.26873	-0.097497	-0.046171	0.36738	0.611	passed	9198	none	none
TAS2R7	-0.051874	0.14749	-0.044634	0.39297	-0.19641	0.14934	NA	passed	9198	none	none
LRRC20	-0.29257	-0.30971	0.16879	0.30586	-0.018597	0.10005	0.209	passed	9198	none	none
PDE7A	-0.016976	-0.24134	-0.076294	0.045003	0.02299	0.16691	0.551	passed	9198	none	none
YLPM1	0.13824	-0.016062	-0.3021	-0.16816	-0.097126	-0.23642	0.985	passed	9198	none	none
ANKRD60	0.0040283	0.15741	-0.22465	-0.18895	0.019505	-0.0764	0.816	passed	9198	none	none
SLC16A1	-0.45821	-0.1697	0.29137	0.6341	-0.64538	0.22025	0.226	passed	9198	none	none
HTR3A	-0.074286	0.020826	0.17723	0.15295	-0.19419	-0.21776	0.263	passed	9198	none	none
COLEC12	-0.42553	0.018585	0.37526	0.36043	0.033147	0.033768	0.92	passed	9198	none	none
ABCB11	-0.0088541	-0.03186	0.096325	0.16174	-0.013311	0.15883	0.198	passed	9198	none	none
AK3	0.036987	-0.50026	-0.43744	-0.27673	-0.056784	0.3709	0.945	passed	9198	none	none
LINC02210-CRHR1	-0.35763	-0.18756	-0.0015718	-0.14494	0.02896	0.29697	NA	passed	9198	none	none
NQO2	-0.24132	-0.33079	-0.084372	-0.025838	0.067773	-0.00012229	0.471	passed	9198	none	none
RBMY1B	0.33373	-0.20164	-0.14045	-0.029954	0.13559	-0.12262	NA	passed	9198	none	none
DPP4	-0.18856	-0.19122	0.043456	0.0058785	0.10371	0.19532	0.458	passed	9198	none	none
FRY	-0.16135	-0.14007	-0.12641	0.18814	-0.19717	-0.022265	0.981	passed	9198	none	none
NRIP3	-0.43466	0.0073536	-0.15932	0.06938	-0.23787	0.084263	0.474	passed	9198	none	none
GLYATL2	-0.46289	-0.072779	0.29037	0.62017	-0.22325	-0.55323	0.029	passed	9198	none	none
RAC1	-0.32394	-0.12366	0.52921	0.4624	0.20387	-0.092027	0.916	passed	9198	hit	none
LRIG3	0.014925	0.037459	0.17354	0.31245	-0.050545	0.20423	0.614	passed	9198	none	none
DEFB126	-0.10909	-0.040992	-0.10692	0.080854	0.10382	0.069976	0.657	passed	9198	none	none
MYRIP	0.047005	-0.045305	-0.10249	0.023781	0.11465	-0.038539	0.565	passed	9198	none	none
GALR2	-0.35157	-0.064108	0.074256	0.40085	-0.070542	-0.14433	0.685	passed	9198	none	none
KRTAP3-1	-0.01322	-0.044808	0.10595	-0.005756	0.099103	0.076192	0.177	passed	9198	none	none
SGMS2	-0.045069	0.0183	-0.00045218	-0.10021	-0.073372	-0.043203	0.352	passed	9198	none	none
SERBP1	-0.10465	-0.022869	0.078477	0.10999	0.001472	-0.0017999	0.968	passed	9198	none	none
CHDH	-0.33994	-0.22043	0.47552	0.32335	0.48507	-0.077683	0.456	passed	9198	hit	hit
IFT20	-0.30976	0.14463	0.254	0.31828	-0.099131	0.00080871	0.127	passed	9198	none	none
COL28A1	-0.19349	-0.18578	0.14617	-0.19244	0.23844	0.26533	0.194	passed	9198	none	none
ZNF469	-0.25647	0.11697	0.053988	-0.084204	-0.074609	-0.066248	0.653	passed	9198	none	none
LDHAL6B	0.052256	-0.04781	0.071689	0.10962	-0.036448	0.29528	0.377	passed	9198	none	none
G6PD	-0.07498	-0.20358	0.21117	0.17727	0.15871	0.11262	NA	passed	9198	none	none
FOXM1	0.27697	0.033295	-0.66171	-0.21831	-0.32021	-0.0020672	0.938	passed	9198	none	none
MTM1	-0.11662	-0.14343	-0.01574	-0.079175	0.10059	0.24903	NA	passed	9198	none	none
OXCT2	-0.1329	-0.0099022	0.12286	0.070791	-0.019747	-0.0073748	0.279	passed	9198	none	none
SLC34A2	-0.22783	0.084804	0.17281	0.15511	-0.16712	0.092956	0.529	passed	9198	none	none
ZFR2	-0.19241	-0.0089183	0.077703	0.057039	-0.070378	0.15055	0.146	passed	9198	none	none
ALYREF	-0.041531	-0.1456	-0.047394	0.19553	0.18533	0.17008	0.863	passed	9198	none	none
CARD6	0.16521	0.015215	-0.29215	-0.26049	0.11187	-0.14841	0.146	passed	9198	none	none
ZNF16	-0.59113	0.064441	0.50546	0.55427	-0.023591	-0.17154	0.232	passed	9198	none	none
PLEC	-0.15894	0.070867	-0.10537	0.13346	-0.23957	-0.3446	0.133	passed	9198	none	none
SLC26A11	-0.056955	-0.11882	0.28057	0.23941	0.19902	0.007482	0.422	passed	9198	none	none
DCHS2	-0.080402	-0.020117	0.07722	0.20179	0.045528	0.027625	0.084	passed	9198	none	none
FAM20B	-0.087696	-0.13793	-0.10759	0.26423	0.034383	-0.15232	0.293	passed	9198	none	none
CCL4L2	-0.18191	-0.022523	0.034678	-0.29307	0.078613	-0.26003	0.111	passed	9198	none	none
PGA3	-0.35107	0.14987	0.21385	0.32609	-0.28001	-0.29613	0.153	passed	9198	none	none
TTC16	0.066558	0.051882	0.031521	0.15501	0.040634	0.22226	0.259	passed	9198	none	none
GRIK1	-0.24329	-0.047681	0.20587	0.32873	-0.050494	-0.0052655	0.345	passed	9198	none	none
GDF11	-0.13942	-0.22619	0.060083	-0.036694	0.085961	0.39694	0.643	passed	9198	none	none
CXCL9	-0.094485	-0.046356	0.010988	-0.19604	0.075577	0.0080459	0.14	passed	9198	none	none
CCNH	-0.21301	0.10185	0.32674	0.48296	-0.11945	-0.15425	0.366	passed	9198	none	none
NEU1	-0.21711	-0.10448	0.18044	-0.10973	0.15327	0.21019	0.115	passed	9198	none	none
SV2B	-0.1571	-0.19992	0.19301	0.27441	0.038379	-0.035476	0.685	passed	9198	none	none
ARMC3	0.072388	0.088455	-0.058909	0.052642	0.1049	-0.18001	0.299	passed	9198	none	none
TAF1A	0.16443	0.0076222	-0.071076	-0.064965	0.12086	-0.10119	0.456	passed	9198	none	none
IHH	-0.20311	-0.098901	0.20116	0.34644	-0.040531	-0.065875	0.941	passed	9198	none	none
RNF39	-0.082771	-0.2628	0.033682	0.36795	-0.16034	0.18997	0.527	passed	9198	none	none
ZNF843	0.064174	0.10672	-0.054361	0.0027461	-0.084647	-0.022622	0.093	passed	9198	none	none
GABRD	-0.31835	-0.32699	0.17396	0.30762	0.13097	0.25835	0.807	passed	9198	none	none
ACSBG1	0.014456	-0.19795	-0.8091	-0.21955	-0.16012	0.03418	0.498	passed	9198	none	none
CLCA4	-0.38548	0.057045	0.26174	0.27975	-0.072238	0.01024	0.269	passed	9198	none	none
OSTM1	-0.29685	-0.18225	-0.0087214	-0.015333	0.078247	0.13501	0.19	passed	9198	none	none
PPP1R10	-0.18083	-0.039615	-0.20887	0.2071	0.0056914	0.20475	0.974	passed	9198	none	none
DAZ1	-0.10978	-0.25826	0.53205	0.20182	0.11788	0.042563	NA	passed	9198	hit	none
NUP54	-0.10327	0.12838	0.088224	0.19228	-0.26504	0.0645	0.307	passed	9198	none	none
CXorf65	-0.13644	-0.078244	-0.45436	-0.028606	-0.094185	0.032462	NA	passed	9198	none	none
STAG3	-0.13462	0.023415	0.32415	0.16596	-0.095196	0.077514	0.472	passed	9198	none	none
CENPU	-0.2487	-0.20086	0.044911	0.53298	-0.12971	-0.29521	NA	passed	9198	none	none
PGK1	-0.35091	-0.18634	0.098323	0.36236	0.22629	0.21042	NA	passed	9198	none	none
SRRM5	-0.1677	-0.20336	0.26734	0.12841	0.18829	0.24895	0.411	passed	9198	none	none
PCDH18	-0.18703	0.032966	0.040505	0.11231	-0.053976	-0.25051	0.6	passed	9198	none	none
PANK4	0.026477	-0.11152	-0.22837	-0.57586	-0.27337	-0.29972	0.903	passed	9198	none	none
ZNF320	0.15092	0.031756	-0.17732	-0.025346	-0.063183	0.19078	0.309	passed	9198	none	none
F2RL1	0.050996	-0.15721	0.22396	-0.18534	0.23286	0.070921	0.289	passed	9198	none	none
ME2	-0.34385	-0.057164	0.20006	0.1369	0.014934	0.25863	0.663	passed	9198	none	none
PRKACA	-0.072453	-0.15644	0.050186	0.096058	0.26374	0.23208	0.584	passed	9198	none	none
REG1A	0.10718	-0.022422	-0.21838	-0.17709	0.11866	0.063068	0.144	passed	9198	none	none
CDK20	-0.19799	-0.23334	0.041981	0.044402	0.22872	0.16969	0.157	passed	9198	none	none
C9orf106	-0.027359	-0.25288	0.012734	-0.23462	0.27054	0.25964	NA	passed	9198	none	none
S100A5	-0.23841	-0.44085	0.10902	0.17062	0.17999	0.16248	0.05	passed	9198	none	none
GLRA1	0.033065	-0.12409	-0.17565	0.21891	0.096053	-0.080547	0.549	passed	9198	none	none
TLR2	-0.15531	-0.28229	-0.35128	0.15266	0.011986	0.10509	0.229	passed	9198	none	none
ATP10B	0.087713	-0.005826	0.12769	-0.15532	0.023738	0.16709	0.347	passed	9198	none	none
ZNF257	0.021261	-0.31972	-0.23519	0.13811	0.087148	0.33934	0.053	passed	9198	none	none
REL	-0.089856	0.064483	0.027192	0.008016	0.080544	0.35922	0.951	passed	9198	none	none
CPZ	-0.10341	0.01564	0.35471	0.084854	0.036975	0.12288	0.185	passed	9198	none	none
TAS1R3	-0.14742	-0.10653	0.21184	0.062795	0.027915	0.15313	0.243	passed	9198	none	none
PRADC1	0.20696	-0.23692	-0.091536	0.043168	0.038274	0.35804	0.148	passed	9198	none	none
GID8	-0.23039	-0.29895	0.30168	0.076136	0.11849	0.34471	0.958	passed	9198	none	none
OTOP1	0.15936	0.035505	-0.24342	-0.22082	-0.22234	-0.015281	0.688	passed	9198	none	none
MINDY3	0.00012911	-0.046284	-0.31256	-0.22266	-0.070571	-0.082575	NA	passed	9198	none	none
NUMA1	-0.47278	-0.094913	-0.19959	-0.066389	-0.30793	-0.035294	0.934	passed	9198	none	none
PRKCZ	-0.14634	-0.18538	-0.14805	0.36114	0.0549	0.066522	0.72	passed	9198	none	none
POLR1E	0.004964	0.1315	0.091813	0.051447	-0.13753	-0.26463	0.514	passed	9198	none	none
C11orf87	-0.0088701	-0.07613	0.080958	0.32345	0.088123	-0.017358	0.444	passed	9198	none	none
SEC24B	-0.44724	-0.3661	0.35911	0.46363	0.12708	-0.065494	0.963	passed	9198	none	none
RNFT2	0.016712	-0.30458	0.24019	0.09159	0.15981	-0.053219	0.585	passed	9198	none	none
NKRF	0.088915	0.11456	0.23895	0.11944	-0.015248	0.1132	NA	passed	9198	none	none
DEFB129	0.17628	-0.0039691	-0.23839	-0.24681	-0.063034	-0.10016	NA	passed	9198	none	none
AGO2	-0.33652	-0.37796	0.036938	0.11995	-0.18893	0.20698	0.994	passed	9198	none	none
ZWILCH	-0.28084	0.034371	-0.017131	0.45963	-0.42405	0.062677	0.64	passed	9198	none	none
COX7A1	-0.068906	-0.12651	0.021234	0.12134	0.24568	-0.045308	0.216	passed	9198	none	none
MFN2	-0.27801	0.015959	0.032892	0.19884	0.05304	0.027188	0.576	passed	9198	none	none
HMGN4	-0.076239	0.16327	0.11	-0.0046933	-0.022485	0.0041786	0.18	passed	9198	none	none
NEDD4L	-0.31462	-0.035456	0.047668	0.25601	-0.043014	-0.27801	0.987	passed	9198	none	none
HSPB7	0.21435	0.095784	0.0080304	0.0098941	-0.0053257	0.17099	0.471	passed	9198	none	none
CIITA	-0.079345	-0.037173	-0.21801	-0.27645	-0.11588	0.073651	0.831	passed	9198	none	none
MED6	-0.27884	-0.19952	0.35758	0.24299	0.079694	0.079911	0.455	passed	9198	none	none
FAIM2	0.19579	0.10194	0.054659	-0.036249	-0.019337	-0.21513	0.111	passed	9198	none	none
GOLGA6L10	-0.077142	0.090664	0.026299	0.35483	-0.12661	0.14471	0.061	passed	9198	none	none
GRAMD1C	0.035618	-0.16262	-0.052009	0.006816	-0.05194	0.068256	0.17	passed	9198	none	none
FAM25G	-0.097407	0.014951	0.23195	-0.012255	0.019515	0.086473	0.083	passed	9198	none	none
BRD4	-0.18491	0.17764	0.098591	-0.059417	-0.14146	0.057873	0.988	passed	9198	none	none
PLA2G6	-0.12559	-0.06074	-0.25488	0.38765	0.073185	0.3434	0.291	passed	9198	none	none
RAD18	-0.037396	0.10274	0.14322	0.26014	-0.15863	0.031126	0.874	passed	9198	none	none
DNAAF5	-0.033321	-0.096738	0.20896	0.049436	0.032054	0.056715	NA	passed	9198	none	none
SPANXN1	-0.22471	0.092541	0.29949	0.34084	-0.10775	0.02219	NA	passed	9198	none	none
HOXB6	-0.068892	0.13878	0.22749	-0.019938	-0.094438	-0.072031	0.808	passed	9198	none	none
CFAP221	-0.12701	0.086808	0.22631	0.47257	-0.22536	0.16099	NA	passed	9198	none	none
MED17	-0.38132	0.016215	0.13619	-0.014834	-0.054779	0.14907	0.46	passed	9198	none	none
FRMPD4	-0.098956	-0.061729	0.3542	0.0037463	0.26487	-0.16978	NA	passed	9198	none	none
CENPV	-0.25403	-0.11666	-0.12542	0.14014	-0.19467	-0.21906	0.354	passed	9198	none	none
TWF2	-0.036106	-0.035886	0.20641	0.0092604	-0.045096	0.048149	0.233	passed	9198	none	none
ZNF831	-0.081138	-0.074076	-0.096417	0.10291	-0.20818	-0.28775	0.611	passed	9198	none	none
AAMDC	-0.39212	-0.12059	0.47953	0.20945	0.19793	-0.11674	0.37	passed	9198	hit	none
ALDH8A1	-0.06425	-0.093871	-0.3974	-0.027767	0.0080878	0.25428	0.169	passed	9198	none	none
ASL	-0.753	-0.050639	0.3878	0.51553	0.10032	-0.092767	0.143	passed	9198	none	none
SPIRE2	-0.0053262	0.022758	-0.30321	0.1959	-0.17253	0.28309	0.165	passed	9198	none	none
TMEM114	-0.34329	-0.1217	-0.10111	0.36392	-0.0022884	-0.061602	0.205	passed	9198	none	none
NRG2	-0.18936	0.037256	0.022484	0.29742	-0.10058	0.17685	0.969	passed	9198	none	none
CNPPD1	-0.015092	-0.091961	-0.059258	-0.063153	0.28848	0.29098	0.451	passed	9198	none	hit
PCDH9	0.17591	0.0030486	-0.16982	-0.2748	0.067892	0.092117	0.888	passed	9198	none	none
LGI3	-0.067165	0.049508	-0.10477	0.17401	-0.024959	0.14169	0.47	passed	9198	none	none
DEFB124	-0.055333	0.16048	-0.10266	0.072858	-0.10403	0.036096	0.055	passed	9198	none	none
COQ2	-0.12164	0.042118	-0.044296	0.086026	-0.1441	0.37368	0.251	passed	9198	none	none
ZNF667	-0.13312	0.025365	0.084883	0.28831	-0.036529	-0.35836	0.208	passed	9198	none	none
ZNF519	-0.080783	-0.0097451	-0.11828	0.11314	-0.025447	0.16335	0.05	passed	9198	none	none
ITGA9	0.076474	-0.27321	-0.10447	-0.011784	0.0030965	0.078645	0.812	passed	9198	none	none
MYOM1	-0.11477	-0.14867	-0.00098277	0.05842	0.10838	0.18625	0.866	passed	9198	none	none
CDC123	-0.26157	0.1121	0.0030165	0.13695	0.01185	-0.6018	0.61	passed	9198	none	none
LHCGR	-0.19732	-0.37463	0.099584	0.37808	0.064754	0.43718	0.122	passed	9198	none	none
NDUFS2	-0.25187	0.10774	0.11705	-0.059292	-0.41161	0.028522	0.434	passed	9198	none	none
BDKRB2	-0.81819	-0.11171	1.0558	0.93712	0.46246	0.15108	0.815	passed	9198	none	hit
CACNA1H	-0.32387	0.0066917	-0.0025327	0.098402	-0.087826	-0.026932	0.606	passed	9198	none	none
GRIN2B	0.23696	-0.086467	0.24671	-0.25659	0.19022	0.009005	0.997	passed	9198	none	none
RPL6	-0.50966	-0.27993	0.34516	0.14622	0.10284	-0.27276	0.916	passed	9198	none	none
P2RX4	-0.015341	-0.10851	0.018352	-0.040789	0.16706	0.020179	0.331	passed	9198	none	none
HOMER3	0.23416	-0.092317	-0.33447	-0.22488	-0.091294	-0.094955	0.603	passed	9198	none	none
IARS	0.014121	-0.0028217	0.010181	-0.2091	0.0061302	0.1299	0.58	passed	9198	none	none
FRAT1	0.037075	0.027261	-0.68735	-0.059779	-0.16547	0.19306	0.415	passed	9198	none	none
TSPOAP1	-0.024203	-0.094391	-0.026453	0.14403	0.30896	-0.057062	NA	passed	9198	none	hit
SH3BGRL	-0.2742	-0.0095393	0.13912	0.182	0.081669	0.11261	NA	passed	9198	none	none
VENTX	-0.47472	-0.49747	-0.15063	0.070444	0.065814	0.0048816	0.708	passed	9198	none	none
MZF1	-0.027068	0.10965	-0.0064479	0.00023934	-0.031742	0.13758	0.506	passed	9198	none	none
TPM2	0.021841	0.16103	-0.19861	0.10099	-0.33914	-0.007009	0.502	passed	9198	none	none
SNX11	-0.52022	-0.10699	0.23228	0.33701	0.16401	0.13359	0.207	passed	9198	none	none
ATP11AUN	-0.026592	-0.21174	-0.27649	-0.18356	0.11545	0.41591	NA	passed	9198	none	none
AP3D1	0.13451	0.084519	-0.13892	-0.0015389	0.0062919	0.080643	0.823	passed	9198	none	none
CCDC40	0.2188	0.096785	-0.13535	-0.31282	-0.054696	0.073088	0.89	passed	9198	none	none
PAX4	0.059044	-0.047115	-0.36088	0.019703	-0.13197	0.014031	0.446	passed	9198	none	none
SRSF9	-0.1774	-0.24126	0.30287	0.18131	-0.063999	0.0095532	0.828	passed	9198	none	none
RIPOR3	-0.23764	0.038673	0.081332	0.010325	-0.12341	-0.25987	NA	passed	9198	none	none
RUVBL2	-0.17454	-0.18746	0.31736	0.28624	0.13767	0.14584	0.853	passed	9198	none	none
ELOVL4	0.099031	-0.15499	-0.23576	0.23575	-0.091982	0.11559	0.556	passed	9198	none	none
C10orf53	-0.050381	0.061663	-0.048348	-0.019057	0.036086	0.1602	0.221	passed	9198	none	none
PON3	0.057471	-0.047791	0.00088659	0.24494	-0.023886	0.26109	0.386	passed	9198	none	none
SHPK	-0.19975	-0.057074	-0.043228	0.17054	0.16624	0.04663	0.315	passed	9198	none	none
TJAP1	-0.008561	-0.079831	-0.22551	-0.045709	-0.024116	0.017506	0.243	passed	9198	none	none
DPP6	0.070134	0.0092728	-0.28516	-0.24645	0.022238	0.19181	0.916	passed	9198	none	none
ZNF354B	-0.0538	0.021478	-0.18258	0.093592	0.050141	0.012809	0.482	passed	9198	none	none
FAM136A	-0.24528	-0.11814	0.010313	0.31423	0.067083	0.072985	0.212	passed	9198	none	none
DCUN1D4	-0.22767	-0.16795	0.42355	0.52594	0.082342	-0.023017	0.102	passed	9198	none	none
CTU1	-0.14234	-0.10374	0.11315	0.095293	0.089039	0.15661	0.264	passed	9198	none	none
BET1	0.19039	0.08303	-0.21846	0.015043	-0.062308	0.065808	0.202	passed	9198	none	none
ARMCX3	-0.17435	-0.15027	0.31441	0.49261	0.10273	0.16461	NA	passed	9198	none	none
RFX3	-0.42856	-0.21104	-0.23852	0.29218	-0.15043	0.019844	0.997	passed	9198	none	none
VCX3B	-0.14816	-0.22199	0.11229	0.052592	0.0086123	-0.24449	NA	passed	9198	none	none
SOCS3	-0.30022	0.018988	0.21279	0.059906	0.09282	0.17757	0.89	passed	9198	none	none
GPX5	0.23267	0.031706	-0.028838	0.0029875	0.037017	0.11851	0.25	passed	9198	none	none
ZFP57	-0.039417	-0.0078659	0.15118	-0.1357	-0.061328	0.03633	0.322	passed	9198	none	none
FBXL17	-0.13818	-0.28801	-0.087748	0.30562	0.028461	0.46475	0.868	passed	9198	none	none
PARP6	-0.12588	0.010879	0.027614	-0.28324	0.24298	-0.06011	0.861	passed	9198	none	none
MIER1	-0.10735	0.066498	0.056679	0.03563	0.12486	-0.2237	0.685	passed	9198	none	none
ALG9	-0.086353	-0.011497	0.21046	-0.15602	-0.11161	-0.088711	0.438	passed	9198	none	none
DEUP1	0.060758	-0.015054	-0.42164	-0.18857	0.011735	0.021771	NA	passed	9198	none	none
TMEM88B	-0.0071342	0.063701	0.11376	0.14503	-0.036575	-0.070148	0.682	passed	9198	none	none
JRKL	0.041496	0.06207	0.15	0.27209	0.060592	0.23175	0.258	passed	9198	none	none
GPR45	-0.037655	-0.046857	-0.095135	0.23291	-0.25663	0.029032	0.082	passed	9198	none	none
NOS3	-0.14008	-0.040682	0.037624	0.061345	-0.10214	-0.095951	0.785	passed	9198	none	none
ERLIN1	-0.096135	0.018243	0.034888	0.11187	0.061415	0.3001	0.667	passed	9198	none	none
WTIP	-0.33106	-0.14601	0.081683	0.19429	-0.020135	0.15656	0.195	passed	9198	none	none
ITGA2	-0.20179	-0.1851	-0.18666	-0.065186	0.11345	0.1505	0.663	passed	9198	none	none
IFITM1	-0.24016	-0.13512	0.019736	0.1769	0.085744	-0.16321	0.687	passed	9198	none	none
TMEM203	-0.32305	0.038114	0.34711	0.46982	0.059874	-0.15377	0.589	passed	9198	none	none
CARMIL2	-0.14162	0.052111	0.20158	0.23426	0.14756	-0.18047	NA	passed	9198	none	none
EBF4	-0.35907	-0.31441	0.02266	0.24174	-0.027637	0.22235	0.866	passed	9198	none	none
LHFPL3	0.051457	0.10597	-0.30997	-0.24998	0.0055106	0.24097	0.514	passed	9198	none	none
B2M	0.35058	-0.075659	0.065438	0.31775	-0.0049668	0.29455	NA	passed	9198	none	none
ADCY1	0.27524	-0.023372	-0.019064	0.1453	0.11045	0.11858	0.892	passed	9198	none	none
DKK4	-0.35936	-0.22081	-0.0553	0.24699	-0.0046822	0.15925	0.137	passed	9198	none	none
KLHL30	-0.23538	0.068942	0.20451	0.21893	0.069129	-0.12116	0.469	passed	9198	none	none
KMT2D	-0.13514	-0.28057	-0.15199	0.10322	-0.16343	0.23101	0.991	passed	9198	none	none
MAGEB10	0.31208	-0.088285	-0.052298	-0.24233	0.079153	-0.12824	NA	passed	9198	none	none
SSH3	-0.89716	-0.04186	0.36876	0.22635	-0.28809	-0.111	0.099	passed	9198	none	none
AQP2	-0.13269	0.10422	0.038775	0.081423	-0.038766	0.28278	0.767	passed	9198	none	none
NPDC1	-0.53328	-0.43958	0.1423	0.093127	0.19941	0.17016	0.334	passed	9198	none	none
MAPKAPK3	-0.083547	-0.1094	-0.29918	0.10982	0.071025	0.080917	0.278	passed	9198	none	none
CNGB1	0.19215	0.026351	0.31557	-0.30047	-0.012093	-0.13558	0.101	passed	9198	none	none
IL12B	-0.22998	0.18537	-0.021337	-0.21308	-0.27947	-0.30938	0.708	passed	9198	none	none
MNDA	-0.1093	0.049371	0.11863	0.12429	-0.16438	0.16985	0.017	passed	9198	none	none
EHD3	-0.11066	0.061848	0.030293	-0.12698	0.028276	-0.21505	0.484	passed	9198	none	none
JAG2	-0.27318	-0.1314	0.16828	-0.035544	0.2145	-0.011748	0.882	passed	9198	none	none
TNFSF10	-0.57317	-0.61947	-0.34054	0.85351	-0.35244	0.54135	0.704	passed	9198	none	none
TAF4B	-0.20394	0.11394	0.29209	0.18711	-0.12124	-0.128	0.181	passed	9198	none	none
PHOSPHO2	-0.10889	-0.094947	0.072476	0.14261	0.065127	0.099695	0.091	passed	9198	none	none
KIF26A	-0.25389	-0.14308	0.26252	0.020201	0.19945	-0.074545	0.874	passed	9198	none	none
MTHFR	-0.68245	-0.064861	0.34877	0.84088	-0.10084	0.31053	0.392	passed	9198	none	none
RIIAD1	-0.5004	-0.072422	-0.05132	0.19906	0.0085579	0.066702	0.13	passed	9198	none	none
UACA	-0.10925	0.0024015	0.27489	0.1746	0.065538	0.31856	0.923	passed	9198	none	none
C12orf57	0.25053	-0.12464	-0.28872	-0.26689	0.090595	-0.19753	0.418	passed	9198	none	none
CEACAM3	-0.019928	-0.25499	-0.083589	0.06753	-0.071848	0.36981	0.1	passed	9198	none	none
TBC1D26	0.13322	0.16716	-0.19168	0.047093	0.020553	0.18188	0.127	passed	9198	none	none
TGIF2-C20orf24	-0.38013	-0.30727	0.19586	0.24042	-0.24299	-0.067792	0.393	passed	9198	none	none
RAMP1	-0.35782	-0.11058	-0.050014	0.36257	0.084781	0.080103	0.623	passed	9198	none	none
ZBTB8B	-0.14276	-0.0011241	-0.13086	-0.19445	-0.15215	0.042469	0.562	passed	9198	none	none
UROD	-0.083769	-0.007711	-0.010739	-0.19456	0.018603	-0.032783	0.166	passed	9198	none	none
EXO5	0.16911	0.057421	-0.39337	-0.38322	-0.16293	-0.090027	0.08	passed	9198	none	none
DPEP2	-0.081587	0.10086	0.10991	-0.050177	-0.09491	-0.0055183	0.159	passed	9198	none	none
KIF11	-0.41933	-0.51339	2.5633	1.0576	1.9292	0.9596	0.972	passed	9198	none	none
YBX1	0.0075715	0.17739	-0.24382	0.092079	-0.11692	0.047887	0.942	passed	9198	none	none
UBASH3A	-0.048038	-0.030937	0.21776	0.19842	0.21429	0.071187	0.545	passed	9198	none	none
ZC3H14	-0.2338	-0.038179	0.37563	-0.12731	0.01489	0.1021	0.988	passed	9198	none	none
KDM3B	-0.38211	-0.23606	0.38191	0.05316	0.36373	-0.040621	0.991	passed	9198	none	hit
METTL18	-0.69851	-0.21801	0.0037048	0.25595	0.013625	0.40166	0.197	passed	9198	none	none
NATD1	-0.35378	0.11071	0.32071	0.24083	-0.10226	-0.11934	NA	passed	9198	none	none
WBP4	-0.16479	-0.045178	0.025235	-0.14897	0.10144	-0.082457	0.367	passed	9198	none	none
KIAA0556	-0.25292	-0.31476	0.11913	0.1569	0.18656	0.34088	0.364	passed	9198	none	none
TBX1	-0.23931	-0.0021319	0.13411	-0.12168	0.045052	0.13391	0.85	passed	9198	none	none
POC1B	-0.5212	-0.32595	0.59233	0.37855	0.01629	0.4425	0.459	passed	9198	hit	none
CDX1	0.22992	0.069687	-0.50749	-0.14775	-0.056345	-0.016282	0.323	passed	9198	none	none
RSAD2	-0.28237	-0.17561	-0.028978	0.20051	0.19013	0.024941	0.697	passed	9198	none	none
RET	0.099209	-0.17903	0.35199	0.026774	0.28127	0.34808	0.972	passed	9198	none	hit
CNOT3	-0.036385	-0.11769	-0.18553	0.13916	0.082108	0.13591	0.993	passed	9198	none	none
ATF2	-0.1297	-0.064483	0.0045332	0.052731	0.019265	-0.11253	0.878	passed	9198	none	none
TPP2	-0.20585	-0.15097	0.18149	0.2761	0.053949	-0.21209	0.986	passed	9198	none	none
RPSA	-0.6742	0.070368	0.33426	0.29611	0.10342	0.29053	0.967	passed	9198	none	none
AGR2	-0.53455	-0.02167	0.34701	0.43671	0.031086	-0.13103	0.651	passed	9198	none	none
SEMA3E	-0.14298	0.039218	-0.038288	-0.023635	-0.16124	0.26959	0.218	passed	9198	none	none
PROK2	-0.3401	-0.22913	-0.13743	-0.70242	0.12286	0.0050283	0.369	passed	9198	none	none
CWC15	-0.12514	0.17514	-0.077566	-0.34823	-0.17475	-0.60086	NA	passed	9198	none	none
DERA	-0.051227	0.023893	0.043478	0.06031	-0.19423	0.1751	0.349	passed	9198	none	none
CCNT1	0.01073	0.083165	0.57571	-0.42648	0.44405	0.13872	0.346	passed	9198	none	hit
SAXO2	0.068904	0.024844	-0.22983	-0.091048	0.02557	-0.070599	NA	passed	9198	none	none
PRSS50	0.072564	0.0023097	-0.29573	-0.13644	0.0050859	0.25863	0.241	passed	9198	none	none
RPL12	-0.10947	0.20072	0.14202	0.24054	0.0017848	-0.033288	0.937	passed	9198	none	none
INHA	-0.18622	-0.12256	0.0040352	0.12531	0.16337	-0.071593	0.634	passed	9198	none	none
SLC20A1	-0.50452	0.072504	0.3168	0.5028	-0.082446	0.076928	0.408	passed	9198	none	none
MRPS9	-0.20882	0.028143	0.20803	0.038358	-0.38184	-0.22604	0.227	passed	9198	none	none
CRNN	-0.40404	-0.27561	0.36606	-0.017893	-0.15163	0.067212	0.102	passed	9198	none	none
CCDC136	-0.10213	-0.06571	0.058157	0.073482	-0.018434	-0.095635	0.391	passed	9198	none	none
TRMT112	-0.16551	-0.070059	-0.015729	-0.122	0.065116	0.19827	0.148	passed	9198	none	none
NUDCD2	-0.12602	-0.15852	-0.13407	-0.13138	-0.29635	-0.033017	0.829	passed	9198	none	none
ZDHHC24	0.054598	-0.12898	0.12265	-0.038967	0.15538	-0.089316	0.066	passed	9198	none	none
KRTAP21-3	-0.0019603	0.10443	-0.031134	0.09087	-0.024338	-0.001178	NA	passed	9198	none	none
KCNJ3	-0.23334	-0.22669	0.32376	0.38024	0.24909	0.21572	0.867	passed	9198	none	none
ENTPD2	-0.015733	0.070879	-0.13838	0.10596	-0.22478	-0.035382	0.543	passed	9198	none	none
TMEM102	0.046744	-0.10816	-0.10233	-0.37058	0.20343	-0.044408	0.511	passed	9198	none	none
ZNF362	-0.13408	0.068571	0.02775	0.035053	-0.30141	-0.1813	0.86	passed	9198	none	none
FDX1	-0.03933	-0.12683	-0.1761	-0.034742	0.058099	0.19169	0.705	passed	9198	none	none
NR4A1	-0.35073	0.11322	0.58633	0.31612	0.13087	0.25245	0.521	passed	9198	hit	none
CLEC12B	0.21509	-0.26425	-0.33054	-0.13243	0.30134	0.4441	0.33	passed	9198	none	none
TNNI1	-0.29859	0.085153	0.22262	0.55087	-0.074135	-0.26653	0.51	passed	9198	none	none
EID3	0.17281	-0.16292	-0.095093	0.032104	0.0523	-0.24656	0.393	passed	9198	none	none
SRP68	0.2782	-0.090201	-0.13423	-0.094977	-0.066321	0.25704	0.768	passed	9198	none	none
CCDC114	-0.37835	-0.32994	0.22767	0.54389	0.12583	0.45483	0.232	passed	9198	none	none
ASB10	-0.07918	-0.13849	0.060284	0.1027	-0.2417	-0.089237	0.272	passed	9198	none	none
RGS14	-0.14372	-0.07676	-0.13807	-0.002827	-0.019946	-0.068111	0.821	passed	9198	none	none
NEUROG3	0.085072	-0.084198	0.14879	0.11167	0.057692	0.096029	0.483	passed	9198	none	none
ENPP6	0.14324	-0.025545	-0.14008	-0.15041	0.21089	0.18209	0.703	passed	9198	none	none
ECE2	0.042979	-0.15285	-0.29703	-0.40711	0.32259	0.012546	0.475	passed	9198	none	hit
EFCC1	-0.057642	-0.061517	-0.08398	0.031313	-0.029598	0.30374	0.2	passed	9198	none	none
SURF6	0.094435	0.033911	-0.22329	-0.24097	-0.22436	-0.085354	0.189	passed	9198	none	none
ZNF275	-0.025315	-0.24838	0.30872	-0.010944	0.50033	0.10258	NA	passed	9198	none	hit
AGXT2	-0.22749	0.04686	-0.012565	0.1417	-0.17858	0.078635	0.455	passed	9198	none	none
MICAL3	-0.20793	-0.36329	0.40731	0.064643	0.26415	-0.012155	0.867	passed	9198	none	none
ERCC4	0.022739	-0.13898	-0.0098857	0.019395	0.14967	0.19121	0.579	passed	9198	none	none
SOX6	-0.5117	-0.17406	-0.3657	-0.42787	-0.58584	-0.34373	0.971	passed	9198	none	none
HIGD1B	-0.23886	0.14184	0.060519	0.094177	-0.12154	0.09602	0.115	passed	9198	none	none
TP53AIP1	-0.54404	0.029099	0.24359	0.40235	-0.10005	-0.11625	0.451	passed	9198	none	none
CHRNA2	0.13903	-0.070932	-0.089216	-0.17048	-0.065198	-0.08985	0.342	passed	9198	none	none
MRPL40	-0.049597	0.084323	0.18473	0.00423	0.13532	-0.010462	0.238	passed	9198	none	none
ATXN1L	-0.30385	-0.11303	0.021595	-0.045398	-0.072047	0.1447	0.713	passed	9198	none	none
MAPK11	-0.16496	-0.091974	-0.12251	0.31111	0.012736	0.047776	0.808	passed	9198	none	none
GJA5	0.078155	-0.18472	0.010228	0.042249	0.21532	0.086886	0.141	passed	9198	none	none
IP6K1	-0.080689	-0.018674	0.082851	0.28815	0.10484	-0.065756	0.368	passed	9198	none	none
WNT9A	-0.20118	-0.10492	0.22325	0.32629	0.084108	-0.12107	0.852	passed	9198	none	none
ANK2	0.087753	-0.20742	0.24994	0.074074	0.22304	0.12413	0.998	passed	9198	none	none
KRTAP5-2	0.16145	0.26616	-0.068914	0.01016	-0.14016	-0.035483	0.558	passed	9198	none	none
NCK1	-0.21389	-0.081524	-0.006829	0.11796	-0.035479	0.092421	0.504	passed	9198	none	none
HOXB1	-0.053069	-0.0083358	0.053397	0.032431	0.13202	-0.23475	0.67	passed	9198	none	none
TIGD7	-0.315	-0.054958	-0.014654	-0.24277	-0.11139	0.12809	0.084	passed	9198	none	none
DHRS7	-0.070324	-0.068125	-0.074967	0.095692	-0.20623	0.01899	0.255	passed	9198	none	none
ERVH48-1	-0.0067223	-0.064088	-0.015977	0.12664	-0.039707	0.1153	NA	passed	9198	none	none
POSTN	0.18482	-0.12724	-0.2249	-0.17577	0.13184	-0.21266	0.082	passed	9198	none	none
C21orf2	0.073106	-0.062684	-0.014358	-0.062681	-0.19434	-0.1049	0.301	passed	9198	none	none
FOXI2	-0.10675	-0.1169	0.40362	0.22647	0.30056	0.19027	0.967	passed	9198	none	hit
SLAMF1	0.22084	0.14326	-0.59672	-0.25765	-0.36257	-0.44248	0.205	passed	9198	none	none
TMEM128	-0.44836	0.16231	0.18636	0.28886	-0.26172	0.043195	0.54	passed	9198	none	none
VPS11	0.24858	-0.059532	-0.020135	-0.12386	0.051719	-0.042883	0.52	passed	9198	none	none
MRPL12	0.25874	0.11043	-0.16273	0.1009	0.0057706	0.13745	0.553	passed	9198	none	none
RPS28	-0.13022	-0.029022	0.079002	-0.055556	-0.065936	-0.065494	0.43	passed	9198	none	none
CHMP2A	-0.24804	-0.056557	0.22944	0.16556	0.03872	0.33224	0.602	passed	9198	none	none
CYSRT1	-0.31203	-0.097066	0.10147	0.43246	0.025735	0.32266	NA	passed	9198	none	none
SLC2A4RG	-0.67122	-0.11927	0.52764	0.037449	0.28633	-0.18621	0.53	passed	9198	hit	hit
PHF5A	-0.045621	-0.18824	0.25523	0.11701	0.36744	0.12429	0.885	passed	9198	none	hit
CDKL1	-0.35491	-0.041779	0.085971	0.17527	-0.047218	0.22758	0.142	passed	9198	none	none
RXFP4	-0.36945	0.0036579	0.19873	0.34095	-0.015451	0.13235	0.096	passed	9198	none	none
EML6	-0.09613	-0.108	0.25801	0.35247	-0.075072	0.096144	0.607	passed	9198	none	none
SMG8	0.0026279	-0.093893	-0.42054	0.2181	0.083954	0.23523	0.304	passed	9198	none	none
TRAF3IP1	-0.12343	0.013144	0.11054	-0.1727	-0.09245	-0.15384	0.624	passed	9198	none	none
IGSF9	0.06781	0.033275	-0.15712	0.044415	-0.0035276	0.20985	0.529	passed	9198	none	none
PTTG2	-0.0025831	-0.22627	-0.16081	-0.013565	0.060657	0.10779	0.164	passed	9198	none	none
ZNF597	-0.078628	-0.19454	0.072394	0.10109	0.27484	0.26294	0.278	passed	9198	none	hit
SERPINA9	-0.021327	-0.12344	-0.0041502	-0.11899	0.010871	-0.065314	0.231	passed	9198	none	none
RNF183	-0.47194	-0.2757	0.08224	0.2935	-0.076309	0.080723	0.122	passed	9198	none	none
INTS7	-0.28721	-0.08235	0.21755	-0.098179	0.12322	-0.46205	0.875	passed	9198	none	none
XKR4	-0.13949	-0.039693	0.053823	0.067948	0.1628	0.12604	0.599	passed	9198	none	none
ACSM3	-0.20681	-0.038357	0.060472	0.15176	0.080153	-0.17369	0.487	passed	9198	none	none
GALNT15	0.073333	0.25372	0.18899	0.099228	-0.055527	-0.16332	0.458	passed	9198	none	none
CCDC129	-0.0098592	0.17474	-0.12374	-0.22391	-0.25019	-0.38033	0.149	passed	9198	none	none
KRTAP25-1	-0.21648	0.007565	-0.13652	-0.058998	-0.10787	0.10118	NA	passed	9198	none	none
TTC39B	-0.32635	-0.095627	0.33838	0.28916	0.05283	0.14919	0.111	passed	9198	none	none
ACYP2	-0.40068	-0.064887	0.32213	-0.059235	-0.055587	0.18304	0.232	passed	9198	none	none
ZBTB8A	-0.028024	0.038284	-0.1525	0.031513	-0.037272	0.14877	0.518	passed	9198	none	none
CCDC65	-0.24326	0.1585	0.18746	-0.038991	0.00039057	-0.061735	0.069	passed	9198	none	none
ASAH2	-0.098344	-0.016305	-0.14981	0.072241	0.10443	-0.0029547	0.126	passed	9198	none	none
PTAR1	0.16941	-0.17029	-0.30678	-0.29671	-0.048171	0.1204	0.639	passed	9198	none	none
MAPKAP1	0.0063463	-0.16446	-0.16813	-0.20633	0.037598	0.32585	0.976	passed	9198	none	none
TUBG2	-0.20146	-0.11903	-0.087821	0.12518	0.085187	0.025679	0.12	passed	9198	none	none
HIST1H4J	0.076525	0.080658	-0.17494	-0.10073	-0.081047	-0.40477	0.272	passed	9198	none	none
FHL3	-0.51793	0.0033431	0.12299	0.2398	-0.27887	0.11751	0.382	passed	9198	none	none
ACR	-0.13575	-0.078286	0.054508	0.071428	-0.014919	-0.079677	0.599	passed	9198	none	none
C1QTNF7	-0.10643	-0.21097	0.26891	0.20787	0.14195	0.23278	0.549	passed	9198	none	none
MTMR6	0.13027	0.1334	-0.16052	-0.032657	-0.053361	-0.1466	0.246	passed	9198	none	none
C22orf42	0.11105	-0.11434	-0.07742	0.014864	0.056821	-0.077471	0.056	passed	9198	none	none
MRPL54	-0.11391	-0.20022	0.16865	0.095236	0.3278	0.22931	0.394	passed	9198	none	hit
RPL5	-0.079501	-0.023281	-0.027951	-0.014447	-0.034845	-0.033133	0.968	passed	9198	none	none
EHD4	-0.10123	0.11446	0.0090252	0.043462	0.15169	-0.094501	0.402	passed	9198	none	none
ZEB1	-0.20443	-0.038094	0.18374	0.316	-0.1421	-0.045762	0.837	passed	9198	none	none
OR1J1	-0.39731	-0.037031	0.30922	0.078271	-0.0036367	-0.25116	0.058	passed	9198	none	none
SLC38A4	-0.15544	-0.13762	1.0568	0.21556	0.4265	-0.063712	0.533	passed	9198	hit	hit
BAG2	0.31503	-0.20995	-0.18604	-0.32376	-0.078051	-0.051994	0.424	passed	9198	none	none
CDK5RAP3	0.28183	-0.11089	-0.044644	0.0047895	0.22538	-0.053181	0.242	passed	9198	none	none
C1orf137	-0.26084	-0.05439	0.45235	0.3583	0.13427	0.099184	NA	passed	9198	hit	none
MLLT10	-0.12046	0.067382	0.097672	0.092824	-0.096197	0.011151	0.992	passed	9198	none	none
EBLN2	-0.29104	-0.29417	0.3185	0.091238	0.27529	0.088742	0.363	passed	9198	none	hit
C11orf24	-0.034427	-0.18023	-0.067394	0.24525	0.1729	0.014503	0.145	passed	9198	none	none
SYCE3	-0.090045	-0.11063	-0.037613	0.098046	0.043236	-0.047385	0.895	passed	9198	none	none
POC5	-0.2086	-0.052635	-0.26543	0.089706	-0.23235	-0.35263	0.215	passed	9198	none	none
TSPO	-0.33242	-0.011898	0.096979	-0.024603	-0.12098	0.042747	0.256	passed	9198	none	none
THAP1	-0.026286	-0.010854	-0.040609	-0.40996	0.0019212	0.0832	0.331	passed	9198	none	none
SREK1	-0.19282	0.019916	0.24913	0.27536	0.051823	0.34201	0.846	passed	9198	none	none
MUC17	-0.27371	-0.039929	0.13539	0.19345	0.0056799	0.1593	0.092	passed	9198	none	none
PDE9A	-0.15226	-0.067782	0.24937	0.27331	-0.2829	0.073249	0.89	passed	9198	none	none
HOXB9	0.24572	-0.16412	0.13131	0.18149	0.2406	0.0083472	0.939	passed	9198	none	none
SQLE	-0.27814	-0.34257	0.17012	0.35302	-0.5634	0.19906	0.951	passed	9198	none	none
ZNF286A	-0.15239	0.081676	-0.067545	0.14573	0.10204	0.1635	0.175	passed	9198	none	none
DZANK1	-0.56798	-0.24653	0.035709	0.19523	0.15904	0.11511	0.131	passed	9198	none	none
TMCO6	-0.49536	-0.0026432	0.27804	0.46006	-0.0057674	-0.13456	0.154	passed	9198	none	none
OR4D10	-0.019107	0.18119	-0.0061235	-0.1287	-0.24397	-0.29682	NA	passed	9198	none	none
KLRF1	-0.24137	-0.27164	-0.057209	0.43757	-0.13823	0.18447	0.134	passed	9198	none	none
OR10V1	-0.36949	-0.18576	0.19664	0.52602	0.11529	0.071893	0.026	passed	9198	none	none
ANKRD12	-0.27693	-0.14496	0.082873	-0.099515	0.083358	-0.1396	0.972	passed	9198	none	none
TBXA2R	-0.13432	-0.20999	0.20872	0.28701	0.11099	0.079031	0.519	passed	9198	none	none
LALBA	-0.15417	0.14424	0.19793	0.4748	-0.096178	-0.17877	0.153	passed	9198	none	none
AMIGO1	-0.088642	0.097351	0.12359	0.26476	-0.27049	-0.17457	0.352	passed	9198	none	none
RRP7A	-0.10874	-0.012196	0.16434	-0.33373	-0.20264	-0.075837	0.266	passed	9198	none	none
PGRMC1	-0.48422	-0.52273	0.045214	0.33305	0.097158	0.3165	NA	passed	9198	none	none
ANGPTL6	-0.053771	-0.11167	0.12916	0.31054	0.07334	0.10983	0.482	passed	9198	none	none
ZNF281	-0.13339	-0.086723	0.28656	0.079848	-0.10442	-0.011519	0.611	passed	9198	none	none
ADCY10	-0.058331	0.070329	-0.21233	-0.32119	-0.09739	0.17895	0.198	passed	9198	none	none
GOLT1A	-0.073834	-0.16231	0.1675	-0.24538	0.096964	0.19977	0.355	passed	9198	none	none
RABL2A	-0.12685	0.1362	-0.040132	0.013711	0.033282	0.10042	0.074	passed	9198	none	none
GOLGA7B	-0.35081	0.047101	0.26016	0.14599	-0.082811	-0.14749	0.429	passed	9198	none	none
SLC25A36	-0.24063	-0.081167	0.29982	0.32038	-0.036567	0.14418	0.519	passed	9198	none	none
ZNF695	-0.21703	0.047798	-0.01824	-0.11289	0.044513	-0.0076586	0.221	passed	9198	none	none
SLCO3A1	-0.41882	-0.4155	0.42984	0.0061944	-0.001946	0.20927	0.857	passed	9198	none	none
C22orf23	-0.013965	-0.18269	-0.063271	0.018576	0.23729	0.18125	0.366	passed	9198	none	none
FUT9	0.028538	-0.0086818	-0.3468	-0.19104	-0.15141	-0.14793	0.056	passed	9198	none	none
CDK1	-0.74319	-0.58103	-0.079767	0.45366	-0.62472	-0.015263	0.853	passed	9198	none	none
DLL1	-0.33045	0.039723	-0.18606	0.12513	-0.056061	-0.097687	0.999	passed	9198	none	none
NT5DC4	-0.042371	-0.21632	-0.12497	0.11149	0.060579	0.015341	0.117	passed	9198	none	none
PPP4R2	-0.042445	-0.16525	0.015467	0.073136	0.12072	0.30107	0.91	passed	9198	none	none
SPDL1	-0.56358	0.2471	0.27932	0.16283	-0.046666	0.50478	0.741	passed	9198	none	none
RPS6KB1	-0.002052	-0.018726	-0.28149	-0.29767	-0.20391	-0.037753	0.975	passed	9198	none	none
OR4K2	-0.16559	0.024107	0.046698	0.40527	-0.14961	0.26768	NA	passed	9198	none	none
TUSC5	-0.57849	-0.16469	0.17144	0.34017	0.1039	0.39792	0.601	passed	9198	none	none
PLAU	-0.22051	-0.011902	-0.010809	0.18551	0.11312	0.11289	0.484	passed	9198	none	none
ACSM6	-0.057139	-0.040289	0.046727	0.069557	0.061272	0.0052789	NA	passed	9198	none	none
TUBGCP6	0.012351	0.050712	0.3764	-0.11501	0.26799	0.16368	0.663	passed	9198	none	none
PHF21B	-0.050702	0.0048095	-0.015207	0.045912	-0.17968	-0.17957	0.984	passed	9198	none	none
DEFB104B	0.088355	-0.1445	-0.070654	-0.26709	0.08838	-0.24243	NA	passed	9198	none	none
PCTP	-0.49398	-0.26959	0.305	0.63327	-0.10633	0.45624	0.48	passed	9198	none	none
ZNF611	-0.24422	-0.36296	-0.17323	0.045253	0.098528	0.40779	0.244	passed	9198	none	none
METTL17	0.16364	-0.020705	0.061126	0.020068	0.069491	-0.022237	0.184	passed	9198	none	none
RAB40B	0.065079	-0.10582	-0.070378	-0.086522	0.15282	0.18496	0.433	passed	9198	none	none
MTFP1	-0.12274	0.0058504	-0.35712	-0.047326	-0.1608	0.12845	0.344	passed	9198	none	none
UPF1	-0.27259	0.086471	-0.067038	-0.08202	-0.14391	-0.048208	0.917	passed	9198	none	none
ECSIT	-0.18911	-0.042526	0.10434	0.052686	0.0039892	-0.0221	0.217	passed	9198	none	none
ZNF853	-0.29316	-0.073567	0.096554	0.28319	-0.014282	0.12832	0.525	passed	9198	none	none
FAM169B	-0.12843	-0.019506	-0.065463	0.08326	-0.11752	-0.16547	0.723	passed	9198	none	none
CARMIL1	-0.29742	0.092644	-0.017432	-0.17157	-0.058025	0.11318	NA	passed	9198	none	none
ARHGEF15	-0.11278	-0.032679	0.016674	0.11537	-0.18721	0.09829	0.507	passed	9198	none	none
TNNC2	-0.30584	-0.25309	-0.026803	0.07112	0.15084	0.41505	0.431	passed	9198	none	none
CFHR3	0.199	0.011563	-0.38606	-0.079513	0.12881	-0.012662	0.077	passed	9198	none	none
EBLN1	-0.010547	0.11715	0.055468	0.13956	-0.28332	-0.061615	0.196	passed	9198	none	none
SELENOF	-0.21251	0.13458	0.22926	-0.38003	-0.12397	-0.12382	NA	passed	9198	none	none
GPC1	-0.75803	-0.14239	0.11568	0.19552	-0.39378	0.11586	0.489	passed	9198	none	none
IL23R	-0.32202	0.0046218	0.20657	0.28481	0.048758	-0.072176	0.347	passed	9198	none	none
CAPN15	-0.17622	-0.032735	-0.10969	-0.019079	-0.15003	0.36665	0.636	passed	9198	none	none
SNX7	-0.43128	-0.092458	0.33067	0.33142	-0.0084696	0.18286	0.219	passed	9198	none	none
BCL10	-0.05138	-0.25966	-0.10877	-0.40956	0.23218	-0.056424	0.414	passed	9198	none	none
HIC2	0.10272	0.2257	-0.41038	-0.1719	-0.1691	0.062856	0.795	passed	9198	none	none
GDF10	-0.23327	0.060566	0.38884	0.10765	-0.058184	0.13506	0.524	passed	9198	none	none
CDC20	-0.42654	-0.17617	0.25931	0.11287	-0.033369	0.17857	0.301	passed	9198	none	none
GALR1	-0.67811	-0.23606	0.26021	0.074396	-0.35192	-0.062658	0.973	passed	9198	none	none
ARIH2OS	-0.25512	-0.10344	0.24377	0.42265	-0.047722	0.2347	0.111	passed	9198	none	none
HYAL3	-0.056901	0.028945	-0.16238	-0.16024	0.22247	0.11808	0.143	passed	9198	none	none
UROC1	-0.2104	0.183	-0.16527	-0.14116	-0.1622	2.11e-05	0.293	passed	9198	none	none
PICK1	-0.031179	-0.14386	0.15227	-0.019001	0.31341	0.056582	0.358	passed	9198	none	hit
NAA20	0.14946	0.027689	0.12577	0.36396	0.049082	0.021418	0.582	passed	9198	none	none
OR2T12	-0.4191	0.02491	0.52532	0.2449	-0.046769	-0.49112	NA	passed	9198	hit	none
DCXR	0.18585	0.15051	-0.19589	-0.095342	-0.10524	0.026583	0.509	passed	9198	none	none
BAG6	-0.37838	0.16003	0.096381	0.00019497	-0.18096	-0.1338	0.889	passed	9198	none	none
LDB2	-0.092798	0.035931	0.080277	0.34885	-0.23194	0.12686	0.971	passed	9198	none	none
C8orf89	0.15854	-0.081615	0.08909	0.052435	0.31811	0.20982	NA	passed	9198	none	hit
MPZL3	0.022287	-0.088957	-0.007947	0.31078	0.033525	-0.098634	0.244	passed	9198	none	none
C10orf113	-0.23297	0.12281	0.16562	-0.31255	0.080992	-0.5419	0.204	passed	9198	none	none
SMIM5	-0.26182	-0.17099	0.27736	0.025937	-0.049331	-0.039381	0.301	passed	9198	none	none
PHC2	-0.46516	0.0052311	0.064666	-0.40499	0.12132	-0.29297	0.727	passed	9198	none	none
TMEM245	-0.0079679	-0.16374	-0.069975	-0.38833	0.34327	0.16241	0.856	passed	9198	none	hit
GM2A	0.074523	-0.0049504	0.29692	0.015867	0.040927	-0.14958	0.312	passed	9198	none	none
DCST2	-0.34157	0.0033157	0.054962	0.22845	-0.13742	0.24987	0.167	passed	9198	none	none
SPAG16	-0.025064	-0.28689	0.096307	0.046184	0.13691	-0.075758	0.458	passed	9198	none	none
ISCA1	0.13456	-0.15555	-0.1032	-0.12615	0.065827	0.057346	0.424	passed	9198	none	none
FAM47E-STBD1	-0.33726	-0.29875	0.070575	0.27973	0.32239	0.0097383	0.297	passed	9198	none	hit
BRWD3	-0.36916	-0.061852	0.028655	0.32595	-0.60926	-0.18341	NA	passed	9198	none	none
C9orf170	-0.34895	-0.12745	-0.05818	0.41005	-0.037632	-0.24994	0.141	passed	9198	none	none
CASC10	0.089866	-0.11685	-0.19719	-0.072946	0.027654	-0.011245	0.535	passed	9198	none	none
TMEM126B	-0.31848	-0.13315	0.13045	-0.043924	0.017883	0.15779	0.305	passed	9198	none	none
NEK5	0.33187	0.062355	-0.22141	-0.32352	-0.11379	0.19484	0.041	passed	9198	none	none
FAM174A	-0.23602	0.097462	0.23048	0.37743	0.0062922	0.032727	0.086	passed	9198	none	none
TMEM165	-0.25781	-0.10056	0.27396	0.15247	0.13986	0.1151	0.322	passed	9198	none	none
LRP5	-0.66252	-0.45745	0.5613	0.19454	-0.049202	0.36226	0.885	passed	9198	hit	none
OR2A5	-0.92243	-0.2488	0.73267	0.13674	0.32758	0.3818	0.023	passed	9198	hit	none
SAPCD1	-0.25978	-0.10615	-0.18337	0.41461	-0.34531	0.24924	0.16	passed	9198	none	none
LSS	0.054476	0.01846	-0.082075	0.086018	-0.057447	-0.089482	0.719	passed	9198	none	none
BCCIP	-0.1881	-0.092267	0.090584	0.68404	0.15713	0.31034	0.973	passed	9198	none	none
TMED10	-0.03008	0.038534	-0.11736	-0.15443	-0.0096724	-0.27847	0.774	passed	9198	none	none
PANX1	-0.23682	-0.078565	0.19153	0.29601	0.090472	-0.11261	0.099	passed	9198	none	none
PABPC4	0.10586	-0.12731	-0.41315	-0.034171	0.0072626	0.33014	0.94	passed	9198	none	none
SPIN2A	0.17906	-0.22245	-0.31042	-0.86902	0.21302	0.33737	NA	passed	9198	none	none
SEC22A	0.11625	0.066649	0.1814	-0.050639	0.10103	0.25282	0.187	passed	9198	none	none
UPF3A	0.18658	0.061059	-0.19233	0.10172	-0.016801	0.19974	0.602	passed	9198	none	none
CYP11B2	0.13921	0.11896	-0.093686	-0.063661	-0.031059	-0.20909	0.403	passed	9198	none	none
TNNI3K	-0.24584	-0.3395	0.13079	0.10709	0.385	0.13911	0.074	passed	9198	none	hit
PRRC1	-0.13675	-0.080655	-0.63424	0.12801	-0.19257	-0.057387	0.337	passed	9198	none	none
ARPC1B	-0.14826	-0.0062469	-0.016403	0.11282	-0.12746	0.29537	0.208	passed	9198	none	none
PPFIA1	0.027557	0.044297	-0.038409	0.14635	0.069445	-0.10527	0.957	passed	9198	none	none
ZSCAN30	-0.2529	0.12073	-0.043868	-0.035388	-0.26994	-0.51101	0.154	passed	9198	none	none
GLB1L3	-0.28963	-0.34202	0.092297	0.064903	0.11822	0.12233	0.88	passed	9198	none	none
COL7A1	0.1965	-0.16161	-0.083193	-0.067591	0.035476	0.33501	0.676	passed	9198	none	none
ARMC12	-0.50852	0.047639	0.18368	0.19432	0.016161	0.10909	0.227	passed	9198	none	none
PHF13	-0.091127	-0.043692	0.20749	0.21018	0.17755	0.017072	0.947	passed	9198	none	none
FAP	-0.003424	0.057873	-0.1911	-0.20736	-0.035861	-0.26221	0.428	passed	9198	none	none
C15orf54	-0.039903	0.045625	0.10088	-0.19661	-0.0079898	0.19936	0.07	passed	9198	none	none
RPS4X	0.0086373	-0.31898	0.33858	-0.23324	0.62935	0.17694	NA	passed	9198	none	hit
TMED4	-0.053655	-0.56001	-0.24635	-0.11216	-0.052827	0.28865	0.273	passed	9198	none	none
SLC44A4	-0.31967	-0.06425	0.16003	0.034006	0.12429	0.11741	0.315	passed	9198	none	none
CHRNE	-0.33336	-0.03682	0.090818	0.16105	-0.12527	-0.020208	0.481	passed	9198	none	none
GAL3ST2	-0.10024	-0.064823	-0.070626	0.072764	0.098128	0.06966	0.446	passed	9198	none	none
TFAP4	-0.71555	-0.0088967	0.21035	-0.1812	0.22529	-0.12608	0.879	passed	9198	none	none
RSRP1	-0.15577	-0.11108	0.080383	-0.1497	0.17813	0.31457	NA	passed	9198	none	none
THBD	-0.3739	0.18602	0.32492	0.26089	-0.26151	-0.17611	0.825	passed	9198	none	none
C4orf33	0.080806	0.0076559	0.36766	0.20618	-0.18859	-0.0059425	0.32	passed	9198	none	none
CYB5RL	0.15558	-0.18134	-0.25057	-0.28293	0.1795	0.10428	0.201	passed	9198	none	none
ZNF282	0.010219	0.037292	0.02784	0.025531	0.014326	-0.022553	0.666	passed	9198	none	none
ETNK1	-0.11167	-0.026062	-0.1018	0.34669	0.068626	0.074281	0.9	passed	9198	none	none
FGFBP1	-0.47793	-0.14714	-0.1184	0.36719	0.059944	-0.14761	0.449	passed	9198	none	none
CDRT15	-0.29189	-0.069934	0.011439	0.159	0.11758	0.18002	0.164	passed	9198	none	none
TMEM190	-0.3144	-0.081171	0.24132	0.42349	0.19344	0.14585	0.48	passed	9198	none	none
TMEFF2	-0.19759	-0.045708	-0.096074	-0.20802	-0.24364	0.040656	0.473	passed	9198	none	none
KCNJ10	-0.38031	-0.11495	-0.27751	-0.22388	-0.32396	-0.14213	0.226	passed	9198	none	none
PLA2G3	-0.2613	-0.0033144	0.28188	0.29333	-0.15231	-0.174	0.315	passed	9198	none	none
TMEM126A	0.15406	-0.0072537	-0.17822	-0.14776	-0.11291	0.11276	0.334	passed	9198	none	none
VPS51	-0.10133	0.031657	-0.082124	0.26906	-0.030009	-0.022773	0.103	passed	9198	none	none
TTC38	-0.018663	0.029438	-0.093401	0.055786	-0.0050793	-0.03123	0.706	passed	9198	none	none
C2orf72	-0.16402	-0.29881	-0.13272	0.036501	0.25532	0.029618	NA	passed	9198	none	none
AATK	-0.4316	0.0040258	0.22628	0.47967	-0.082808	-0.08203	0.655	passed	9198	none	none
HIBADH	-0.18513	-0.013336	0.14871	0.15009	-0.080965	0.11842	0.621	passed	9198	none	none
C7orf55-LUC7L2	0.048446	0.0051192	-0.27414	0.081759	0.080833	-0.085494	0.968	passed	9198	none	none
TRIM8	-0.9125	-0.16237	0.737	0.74198	0.16786	0.1211	0.727	passed	9198	none	none
FAM126A	-0.18374	-0.17852	0.28366	0.17592	0.12801	0.11626	0.612	passed	9198	none	none
FAM155A	0.12312	-0.30498	-0.16653	-0.20768	-0.42851	-0.16457	0.913	passed	9198	none	none
ALOX12	0.018236	0.087627	-0.29308	-0.090302	-0.096621	-0.13177	0.334	passed	9198	none	none
KCTD14	-0.09251	-0.069562	0.16509	0.02025	0.11209	0.27485	0.217	passed	9198	none	none
TAF6	0.034942	-0.046167	-0.043829	0.030521	-0.0097822	-0.046943	0.158	passed	9198	none	none
RBCK1	0.069008	-0.075614	0.14895	0.24293	0.095943	0.030118	0.938	passed	9198	none	none
ZNF774	0.0051556	0.10629	-0.026835	0.065091	0.23134	0.28982	0.357	passed	9198	none	none
INO80	-0.29076	0.12745	0.26208	0.084701	-0.096566	0.16107	0.961	passed	9198	none	none
MRGPRX2	-0.025645	0.22636	0.20831	0.14676	-0.31638	-0.58235	0.105	passed	9198	none	none
U2AF1	0.072975	-0.090488	-0.010253	-0.13179	0.1146	0.20011	0.99	passed	9198	none	none
DNTTIP1	-0.64321	-0.12212	-0.18939	0.29349	-0.3562	0.21638	0.301	passed	9198	none	none
SLC6A14	0.24024	-0.40983	0.6558	-0.021988	0.16609	0.35401	NA	passed	9198	hit	none
DYRK4	-0.001218	0.032034	-0.030412	0.21968	-0.2879	-0.23409	0.646	passed	9198	none	none
RIPPLY3	0.32797	0.14477	-0.31989	-0.22647	-0.15541	-0.11794	NA	passed	9198	none	none
CNNM2	-0.17082	-0.015581	0.050303	0.22688	0.1844	0.086767	0.973	passed	9198	none	none
LRRC31	-0.1103	-0.007934	0.0762	0.085061	-0.012875	-0.26664	0.113	passed	9198	none	none
MSRB2	-0.036104	-0.05006	0.32565	0.33899	0.02264	0.11395	0.284	passed	9198	none	none
SHBG	-0.43255	-0.4377	0.11328	0.42491	0.11327	0.5509	0.261	passed	9198	none	none
CD27	-0.24245	-0.012107	0.091508	0.40695	0.051102	-0.098387	0.576	passed	9198	none	none
MPHOSPH8	-0.13297	-0.068154	-0.0033807	0.44051	0.071075	0.017859	0.542	passed	9198	none	none
HRASLS5	-0.70802	-0.21086	0.30554	0.24085	-0.0017013	0.081026	0.082	passed	9198	none	none
FAM193B	-0.60272	-0.21254	0.26413	0.32353	-0.0030289	-0.29458	0.836	passed	9198	none	none
ASB2	-0.083884	0.021779	-0.030671	0.13326	0.11158	0.061237	0.716	passed	9198	none	none
GFM1	-0.18194	0.13642	0.18668	0.10032	-0.24929	-0.49755	0.639	passed	9198	none	none
FOXJ1	-0.21218	-0.20716	0.22009	0.19397	-0.094845	-0.088201	0.92	passed	9198	none	none
KIAA0753	-0.33248	-0.045642	0.063551	0.22043	-0.16774	-0.3398	0.451	passed	9198	none	none
DNAJC5G	-0.16814	-0.08857	0.095295	0.19624	0.17697	0.14311	0.163	passed	9198	none	none
ETS1	0.24972	0.036221	-1.2399	-0.044626	-1.0611	-0.072606	0.989	passed	9198	none	none
MAD2L1BP	-0.02629	0.18254	0.43735	0.76019	0.057537	0.56041	0.259	passed	9198	none	none
C10orf35	-0.33368	-0.17404	0.044038	0.33297	-0.14552	-0.16611	0.116	passed	9198	none	none
RABL3	-0.20458	0.073932	0.09448	0.41989	-0.050171	0.037756	0.114	passed	9198	none	none
SERPINI1	0.0073781	-0.046934	0.26832	0.08111	-0.097808	-0.15858	0.563	passed	9198	none	none
C7orf72	0.0035824	-0.16569	0.14965	-0.1082	0.17187	0.30201	0.178	passed	9198	none	none
METTL7B	0.090866	-0.18235	-0.36587	-0.10316	-0.12387	0.11063	0.245	passed	9198	none	none
BPIFB6	-0.17536	0.17772	0.017462	-0.22629	0.18867	-0.065648	0.025	passed	9198	none	none
CHRNA10	-0.366	-0.22129	0.48634	0.13554	0.30342	0.21668	0.447	passed	9198	hit	hit
PIP	-0.37468	-0.065609	0.3046	0.46086	-0.0022546	-0.091769	0.169	passed	9198	none	none
TAAR9	-0.15244	-0.22161	0.095932	-0.15854	0.10826	0.20941	NA	passed	9198	none	none
CXXC5	-0.50069	-0.33829	0.21484	0.39418	-0.067325	-0.035739	0.703	passed	9198	none	none
ZBTB18	-0.18046	0.048211	0.15293	0.25865	0.1957	0.079877	0.999	passed	9198	none	none
PIKFYVE	-0.10117	-0.019754	0.24135	-0.062364	-0.27535	0.14488	0.843	passed	9198	none	none
ACSM1	-0.046491	-0.27258	-0.083472	0.094606	0.267	0.19368	0.073	passed	9198	none	none
FAM83C	-0.093976	0.015185	-0.029771	-0.0042609	0.20134	0.14995	0.134	passed	9198	none	none
ANGPTL5	-0.078823	0.0045025	0.061508	0.2082	-0.036474	0.10703	0.104	passed	9198	none	none
BOK	0.1441	-0.3774	-0.25555	-0.33808	-0.016108	0.058934	0.873	passed	9198	none	none
PRAMEF33	-0.2965	-0.16811	-0.0081697	-0.087036	0.054612	0.1358	NA	passed	9198	none	none
LHFPL2	-0.54005	-0.11675	-0.19645	0.064725	-0.18164	0.25278	0.343	passed	9198	none	none
SUV39H1	-0.24845	-0.093033	-0.28122	-0.050439	-0.39789	-0.099099	NA	passed	9198	none	none
C2CD2L	-0.16999	0.11266	0.12002	-0.041089	-0.1846	-0.20217	0.886	passed	9198	none	none
MGST1	-0.28843	0.11162	0.23285	0.26473	0.0015235	0.32744	0.216	passed	9198	none	none
FAM180B	-0.22718	-0.10878	0.24049	0.68667	-0.26873	0.16171	0.065	passed	9198	none	none
RAB17	-0.065733	-0.083025	0.17808	0.035143	0.17314	-0.14667	0.82	passed	9198	none	none
TMEM50A	-0.50197	-0.1025	0.25476	0.19536	0.14511	0.35545	0.664	passed	9198	none	none
FBP1	-0.018806	-0.0056481	0.24339	0.11624	0.18147	0.089289	0.494	passed	9198	none	none
PCYOX1	-0.31816	0.091232	0.31883	0.12376	-0.3015	-0.31995	0.206	passed	9198	none	none
PSMC1	-0.067205	0.053527	0.26382	0.0038085	0.070027	-0.059647	0.964	passed	9198	none	none
TMEM26	-0.068528	-0.028351	0.054697	0.29591	0.16206	0.11858	0.15	passed	9198	none	none
DEGS2	-0.30024	-0.28667	0.13451	0.21992	0.15962	-0.19942	0.573	passed	9198	none	none
SIGLEC11	-0.063397	-0.0293	-0.013111	0.2569	0.016769	0.12873	0.223	passed	9198	none	none
FLG	-0.56631	-0.17412	0.61516	0.33868	0.071866	-0.27154	0.106	passed	9198	hit	none
DNAJC3	-0.18245	0.094813	0.29065	0.24069	0.038341	-0.1211	0.844	passed	9198	none	none
BRCA1	0.10176	-0.084828	-0.62618	-0.0083543	-0.45817	0.00209	0.282	passed	9198	none	none
ATP13A2	-0.043516	-0.36374	-0.23098	-0.043816	0.44707	0.18559	0.443	passed	9198	none	hit
MMP14	-0.013703	-0.061056	0.041634	-0.16582	0.03553	-0.27166	0.938	passed	9198	none	none
ALDH2	-0.39587	-0.057247	-0.053312	0.056333	-0.39358	0.13426	0.653	passed	9198	none	none
XRCC1	0.014642	-0.054015	0.21623	0.018693	0.1696	0.2026	0.344	passed	9198	none	none
TRANK1	-0.2925	0.072812	0.088209	0.084606	0.014388	0.020664	0.29	passed	9198	none	none
ZNF587B	0.11407	-0.094401	0.032148	-0.19766	0.22359	0.30342	0.5	passed	9198	none	none
MOXD1	-0.026992	0.097229	-0.20542	0.038617	0.062917	-0.014681	0.394	passed	9198	none	none
GALNT13	0.22488	0.012842	-0.025487	0.16356	0.094534	0.036692	0.482	passed	9198	none	none
ABI2	0.010142	-0.12847	0.29073	0.10337	0.46545	0.17016	0.893	passed	9198	none	hit
IPPK	0.31363	0.15144	-0.10752	-0.19569	-0.0034777	0.26893	0.676	passed	9198	none	none
LYSMD1	0.10388	0.1569	-0.31624	-0.15981	-0.14247	-0.0048338	0.167	passed	9198	none	none
TBC1D3H	-0.17095	-0.18606	-0.051334	-0.51184	0.09616	0.30965	0.083	passed	9198	none	none
PRX	-0.11078	0.089272	0.14655	-0.042945	-0.19574	-0.15083	0.423	passed	9198	none	none
CENPC	-0.10643	0.096913	0.012078	-0.076709	-0.21214	0.047611	0.597	passed	9198	none	none
ATP5J	0.16468	-0.072827	-0.022441	-0.22734	0.14372	-0.091847	0.594	passed	9198	none	none
ZAP70	0.04132	0.25899	0.41813	0.47287	0.083453	0.19564	0.317	passed	9198	none	none
IQCA1L	-0.071402	-0.099231	0.13995	-0.18328	-0.022066	0.014589	NA	passed	9198	none	none
LIMCH1	-0.14787	0.2039	-0.078449	0.040794	0.041603	-0.056935	0.963	passed	9198	none	none
HOXA3	0.0028152	-0.00091064	-0.16681	-0.058957	-0.056574	0.2035	0.979	passed	9198	none	none
SLC35B1	-0.55745	-0.025184	0.47808	0.51869	-0.092394	0.021987	0.322	passed	9198	none	none
C2orf50	0.029666	-0.034063	0.13436	0.034646	0.097219	0.066641	0.248	passed	9198	none	none
GPR62	0.0030775	-0.05166	-0.3253	-0.021292	-0.29294	0.26356	0.192	passed	9198	none	none
PSMB1	-0.047208	0.044735	-0.1033	-0.022441	-0.22487	-0.042836	0.998	passed	9198	none	none
HNRNPDL	-0.71949	-0.3817	-0.071891	0.1249	-0.38185	0.30697	0.657	passed	9198	none	none
CCDC125	-0.17351	0.10611	-0.00074889	-0.0091448	-0.13831	-0.39782	0.098	passed	9198	none	none
OPN3	-0.35437	-0.042415	0.32843	0.36074	-0.074878	0.12207	0.765	passed	9198	none	none
PDS5A	-0.18842	0.053358	0.12432	0.24264	-0.18676	-0.03651	0.989	passed	9198	none	none
FUT6	0.11108	-0.04391	0.063674	-0.16936	0.037571	0.068687	0.496	passed	9198	none	none
INSIG2	-0.016491	-0.13809	-0.076687	-0.07767	0.056428	-0.013789	0.327	passed	9198	none	none
MTTP	-0.046631	0.0092221	-0.1815	-0.067353	-0.14072	-0.18055	0.145	passed	9198	none	none
ZMYM4	-0.14415	0.0051542	-0.4133	0.17997	-0.28691	0.16393	0.979	passed	9198	none	none
CPSF1	-0.16304	-0.17194	-0.0092897	0.083905	0.1649	0.25862	0.279	passed	9198	none	none
MUC2	0.07811	0.020954	-0.11636	-0.23303	-0.044574	0.10161	0.583	passed	9198	none	none
UGT2B28	-0.070735	-0.10498	-0.10665	-0.010277	-0.0084451	-0.044757	0.019	passed	9198	none	none
STAM2	-0.25642	0.13843	0.3425	0.36796	-0.09834	-0.11093	0.294	passed	9198	none	none
PHGDH	-0.60834	-0.22026	0.70063	0.80732	-0.03932	-0.21072	0.366	passed	9198	none	none
DPAGT1	-0.015843	-0.038527	-0.1294	0.043274	-0.059794	0.029604	0.501	passed	9198	none	none
CAMKMT	0.030434	0.059045	-0.15076	-0.36752	-0.10569	0.20511	0.194	passed	9198	none	none
LY6E	-0.49293	-0.44607	0.067583	0.53297	0.016732	0.15085	0.394	passed	9198	none	none
TRIM16	-0.21145	-0.27392	0.092934	0.11297	0.39655	0.018045	0.453	passed	9198	none	hit
ZHX2	0.17705	0.068116	0.22291	-0.1059	0.11931	0.16695	0.584	passed	9198	none	none
TOP3A	0.091631	-0.00043625	0.078288	-0.17265	0.097324	-0.18372	0.641	passed	9198	none	none
USP48	-0.5293	-0.19418	0.54896	0.52903	0.13258	0.10142	0.979	passed	9198	none	none
CDC23	-0.038378	-0.079859	-0.13756	0.24	0.071465	0.054816	0.873	passed	9198	none	none
GTF2IRD2	-0.11333	-0.001131	0.23782	0.023825	0.061443	0.0010306	0.198	passed	9198	none	none
RASL10A	-0.55715	-0.080292	0.39387	0.11065	-0.20395	-0.30651	0.492	passed	9198	none	none
REV3L	-0.10404	-0.056226	-0.097099	0.0078569	0.096654	-0.054501	0.988	passed	9198	none	none
PAPOLG	0.15452	-0.25795	-0.40094	0.084891	0.1386	0.57953	0.836	passed	9198	none	none
PJA1	-0.33109	0.041715	-0.39696	0.57275	-0.17259	0.36968	NA	passed	9198	none	none
MAGEA8	-0.051548	0.0048928	0.092928	0.088006	0.06355	-0.093691	NA	passed	9198	none	none
TXK	-0.24513	-0.066542	-0.11333	0.14226	-0.033704	0.043818	0.168	passed	9198	none	none
B3GNT4	-0.13271	0.0026345	0.085126	0.20953	0.0090642	0.075072	0.269	passed	9198	none	none
SBF2	-0.089175	-0.027667	-0.043518	-0.10758	0.10915	-0.12166	0.884	passed	9198	none	none
CCM2L	0.12733	0.090817	-0.062937	0.17874	0.087799	0.019652	0.339	passed	9198	none	none
ZNF771	-0.20653	-0.24345	0.11262	0.16733	0.085268	0.028721	0.07	passed	9198	none	none
CXADR	0.37127	0.0035413	-0.23348	-0.515	-0.062622	-0.23479	0.749	passed	9198	none	none
SEMG2	-0.59074	0.034288	0.26441	0.51759	-0.087159	-0.52397	0.059	passed	9198	none	none
IQGAP3	-0.11583	-0.19873	-0.038642	0.22456	-0.1181	0.33234	0.116	passed	9198	none	none
GNL1	0.068115	-0.21352	-0.0023262	0.14843	0.015312	0.29031	0.784	passed	9198	none	none
RNF113A	-0.38351	-0.25822	-0.10831	0.28516	-0.062477	-0.34353	NA	passed	9198	none	none
STK35	-0.0958	0.038445	-0.066137	0.2698	-0.087265	-0.1721	0.69	passed	9198	none	none
DOCK11	0.37334	-0.076485	-0.44656	-0.2707	0.0080787	-0.085552	NA	passed	9198	none	none
OR11L1	-0.14706	-0.37116	-0.0056277	0.22276	0.24721	0.069481	0.048	passed	9198	none	none
WNT5A	-0.15842	-0.12936	0.0010576	0.25114	-0.02887	-0.14103	0.98	passed	9198	none	none
CARD18	0.092659	-0.11034	0.022846	-0.00068461	0.1574	0.069734	0.103	passed	9198	none	none
SMIM1	0.031922	-0.080846	0.11154	0.055897	0.16565	0.31502	0.298	passed	9198	none	none
MPDU1	-0.16079	-0.1109	0.26313	0.23474	0.097266	0.11681	0.228	passed	9198	none	none
BCKDHB	0.059489	0.0087435	0.021348	0.1648	-0.12687	0.25499	0.199	passed	9198	none	none
RTL8A	0.0072998	0.10619	-0.033991	-0.27995	0.078099	-0.14631	NA	passed	9198	none	none
CLRN3	-0.20538	0.080191	0.19228	0.074534	0.084448	0.11898	0.484	passed	9198	none	none
PPP6R1	-0.17428	0.0336	0.14105	0.44027	-0.20912	0.094275	0.855	passed	9198	none	none
TSHB	-0.024295	0.041503	-0.2622	-0.35721	-0.045961	-0.27992	0.145	passed	9198	none	none
IKBKG	0.14884	-0.020199	-0.15286	-0.36869	0.22205	-0.15783	NA	passed	9198	none	none
PDE4A	0.012659	-0.023246	-0.28473	0.04334	-0.14467	-0.31156	0.92	passed	9198	none	none
RAPGEF1	-0.4483	-0.11387	0.36804	0.3759	-0.0079641	0.20532	0.971	passed	9198	none	none
LAS1L	-0.27298	0.10146	0.21053	0.29344	0.031972	-0.098558	NA	passed	9198	none	none
IFNGR2	0.16006	-0.066732	0.0098582	-0.13988	0.055097	0.42922	0.931	passed	9198	none	none
OR2C3	-0.36619	-0.05052	0.19496	-0.023895	-0.0151	-0.13707	0.053	passed	9198	none	none
LIPF	-0.098388	-0.086579	0.038195	0.062689	0.071688	0.084826	0.348	passed	9198	none	none
THSD4	-0.11108	-0.259	-0.21236	-0.40789	-0.48147	-0.0049773	0.781	passed	9198	none	none
DPPA5	-0.31326	-0.066192	0.59554	0.11685	0.16361	0.19918	0.1	passed	9198	hit	none
TNKS2	-0.19897	-0.14709	0.42955	0.32267	0.30282	0.25546	0.938	passed	9198	none	hit
GPN1	-0.039553	-0.15853	-0.070473	0.10702	0.043725	0.21638	0.36	passed	9198	none	none
UGGT1	-0.035648	0.049031	0.16648	-0.19152	-0.10132	0.11627	0.316	passed	9198	none	none
TXNRD2	-0.00086252	-0.053348	-0.28291	-0.32204	-0.054477	0.19043	0.071	passed	9198	none	none
HSF2BP	0.19456	-0.084062	-0.080452	-0.17246	0.1509	0.10493	0.459	passed	9198	none	none
OVCH1	0.054903	0.041416	-0.079314	-0.2259	-0.074272	0.10495	0.076	passed	9198	none	none
MRPS22	-0.076574	0.058716	0.13945	-0.044057	0.0060005	-0.057655	0.259	passed	9198	none	none
SEMA3A	-0.53267	0.01204	-0.0049482	0.15783	0.011009	-0.093531	0.821	passed	9198	none	none
PLIN1	-0.39299	-0.016387	0.49353	0.41445	-0.14623	0.25136	0.446	passed	9198	hit	none
ALG2	0.11369	0.025598	-0.019432	-0.070105	0.09678	0.1207	0.423	passed	9198	none	none
OR5AP2	-0.22295	0.031395	-0.12353	-0.40552	-0.03267	-0.10751	NA	passed	9198	none	none
WDPCP	-0.2133	-0.17335	0.031063	-0.17015	0.16293	0.13117	0.194	passed	9198	none	none
BBS1	-0.66415	-0.0039099	0.41513	-0.11435	0.15097	-0.085855	0.055	passed	9198	none	none
SIGLEC12	-0.33257	-0.17024	0.30143	0.13851	0.011171	0.11338	0.098	passed	9198	none	none
ARPP19	-0.14891	0.018902	0.13445	0.094806	-0.077768	0.0063906	0.699	passed	9198	none	none
AIF1	-0.18567	-0.048975	0.32705	0.27086	0.1016	0.17763	0.136	passed	9198	none	none
VDAC3	-0.32505	-0.59858	0.67158	0.53234	0.43147	0.47021	0.813	passed	9198	none	none
PPM1A	0.063366	-0.098225	-0.22881	-0.0086912	-0.15543	0.18111	0.887	passed	9198	none	none
LRP6	-0.4205	-0.018266	0.40727	-0.10316	0.25611	0.10344	0.991	passed	9198	none	none
GPD1	-0.67952	-0.36264	0.19403	0.28886	0.11077	-0.019112	0.44	passed	9198	none	none
TOGARAM2	-0.075732	0.21008	0.17363	0.13198	-0.17374	-0.1681	NA	passed	9198	none	none
GPER1	0.051558	-0.0082665	-0.06669	0.27031	-0.15283	0.25042	0.269	passed	9198	none	none
PLXNA1	0.07747	-0.014199	-0.075754	0.02986	0.10268	0.17996	0.655	passed	9198	none	none
SEPHS2	-0.17914	-0.5868	0.21027	0.20694	0.14065	0.1488	0.093	passed	9198	none	none
RPP25	-0.18713	0.062413	0.19736	0.25895	0.16281	0.11274	0.482	passed	9198	none	none
PPP1R14A	0.16886	-0.12156	-0.36252	-0.099097	-0.049806	-0.049624	0.52	passed	9198	none	none
NARFL	-0.39562	-0.1159	0.16747	0.19347	-0.25732	-0.026616	0.254	passed	9198	none	none
SRF	-0.21762	-0.10849	0.011283	-0.05112	0.12187	-0.1142	0.894	passed	9198	none	none
RPS5	-0.11902	-0.13362	0.18679	0.32505	0.095543	-0.04042	0.882	passed	9198	none	none
CELF6	-0.072979	0.011215	-0.17938	0.17281	-0.080194	-0.058967	0.542	passed	9198	none	none
COPS5	0.15668	-0.034996	-0.075742	-0.084662	0.076837	-0.096113	0.932	passed	9198	none	none
IL5RA	-0.16892	0.089837	0.012351	0.1076	0.035172	-0.11263	0.163	passed	9198	none	none
APOBEC3B	-0.72747	-0.082277	0.0013293	0.61132	-0.36968	-0.084591	0.174	passed	9198	none	none
APOO	-0.14165	-0.14747	0.060898	0.051426	0.079048	-0.20442	NA	passed	9198	none	none
TXNRD3NB	0.081159	0.18528	-0.089934	-0.095131	-0.11576	-0.19498	0.062	passed	9198	none	none
LMOD3	-0.039198	0.095968	-0.051091	0.12848	0.039932	0.20377	0.262	passed	9198	none	none
TMEM86A	-0.23898	-0.16574	0.16153	0.22461	0.01286	0.21762	0.393	passed	9198	none	none
C2orf16	-0.21343	0.021265	0.29534	-0.12237	-0.031042	0.046707	0.085	passed	9198	none	none
TGFBR1	-0.059478	-0.084713	0.19908	-0.034994	-0.075311	0.01862	0.918	passed	9198	none	none
FAM46B	-0.73872	-0.32703	0.26707	0.30456	-0.27418	0.52047	0.459	passed	9198	none	none
EFHD1	-0.20852	-0.15053	-0.28597	-0.075341	-0.17305	0.3835	0.684	passed	9198	none	none
OR6B2	0.20579	-0.20946	-0.10958	-0.065256	0.20486	0.11804	0.327	passed	9198	none	none
ANHX	0.015673	-0.05503	-0.043152	-0.098927	0.18202	-0.23118	0.345	passed	9198	none	none
PSD	-0.67431	-0.22583	0.75916	0.84614	0.35064	-0.074177	0.9	passed	9198	none	hit
ADAT2	-0.41987	-0.47333	-0.23658	-0.064529	-0.14618	-0.11231	0.672	passed	9198	none	none
ZNF250	-0.5604	-0.19601	0.40867	0.59967	-0.086872	0.12166	0.712	passed	9198	none	none
CLEC1B	0.010058	-0.038806	-0.073801	0.021433	0.12355	-0.15693	0.306	passed	9198	none	none
LIPA	-0.25188	-0.05752	0.54897	0.24483	0.16045	0.049294	0.357	passed	9198	hit	none
CCL11	-0.0039815	-0.030055	-0.21014	-0.33547	-0.31589	-0.3534	0.089	passed	9198	none	none
SYT17	-0.068605	0.0043604	0.16622	0.061015	0.029255	0.010196	0.514	passed	9198	none	none
AS3MT	-0.001182	-0.21599	-0.25719	-0.20806	-0.16851	-0.0052775	0.327	passed	9198	none	none
ZNF558	-0.08707	-0.040713	0.30713	0.25897	-0.018388	0.40412	0.195	passed	9198	none	none
KIF7	-0.12065	-0.31621	0.38431	0.33378	0.29155	-0.019104	0.512	passed	9198	none	hit
RSPH10B2	-0.024567	-0.10989	-0.048854	-0.013497	0.16815	0.16873	0.38	passed	9198	none	none
UQCR10	0.026271	0.054105	-0.069962	-0.25644	-0.1008	0.11451	0.144	passed	9198	none	none
BACH1	-0.0032524	-0.034007	0.0095171	0.082692	0.038891	-0.036131	0.837	passed	9198	none	none
PET117	-0.031413	0.060275	-0.22311	0.41434	-0.19693	0.056985	0.186	passed	9198	none	none
FBXL18	-0.2901	0.1234	0.36668	0.081463	-0.050815	0.032726	0.353	passed	9198	none	none
UGT2B7	0.2395	0.046285	-0.4941	-0.36317	-0.03316	0.13997	0.164	passed	9198	none	none
TTC34	-0.15101	-0.044473	-0.12125	-0.055547	-0.038404	0.0048142	NA	passed	9198	none	none
MRPL22	-0.11523	0.15061	0.047493	-0.082718	0.062552	0.21247	0.521	passed	9198	none	none
CMC2	-0.23062	-0.23892	0.037435	0.14891	0.10518	0.13204	0.884	passed	9198	none	none
FBXO6	0.09512	0.07894	-0.2871	-0.3217	-0.14551	-0.15581	0.248	passed	9198	none	none
CLEC9A	-0.014378	0.19704	-0.033708	0.0087958	-0.075034	0.23226	0.358	passed	9198	none	none
MYL6B	-0.45971	-0.024983	0.1829	0.11526	-0.05813	0.22519	0.078	passed	9198	none	none
PAQR7	0.045455	0.042912	-0.032285	-0.334	0.064436	-0.056217	0.174	passed	9198	none	none
PEMT	-0.00035339	0.070772	-0.17794	-0.01172	0.13059	0.082541	0.582	passed	9198	none	none
FCGR2A	-0.29247	-0.10942	0.14471	0.073182	0.067952	0.18038	0.224	passed	9198	none	none
PTOV1	-0.28494	0.093226	0.30352	-0.14963	-0.00060631	0.044251	0.271	passed	9198	none	none
C10orf111	-0.40986	-0.37291	0.25756	0.28922	0.078689	0.65276	0.257	passed	9198	none	none
NKX2-6	-0.085619	-0.11828	0.23938	0.25683	0.085308	0.0090936	0.932	passed	9198	none	none
ZNF385D	0.087944	0.25021	0.042998	0.41828	0.18564	-0.051746	0.799	passed	9198	none	none
FBXO16	0.0093115	-0.087726	0.24919	0.19317	0.20747	0.018317	0.085	passed	9198	none	none
RHOT2	-0.30134	0.11972	0.36103	0.29538	-0.058241	-0.026494	0.271	passed	9198	none	none
COX4I1	-0.11389	-0.17922	0.038876	-0.00013738	-0.070947	-0.017807	0.825	passed	9198	none	none
ENG	-0.010992	-0.1331	0.10881	0.41265	0.10853	0.067749	0.976	passed	9198	none	none
BLK	-0.15548	-0.02795	0.21747	0.13083	-0.040413	-0.08951	0.503	passed	9198	none	none
CLDN17	-0.16056	-0.235	0.044692	-0.13289	0.20021	0.10597	0.035	passed	9198	none	none
TGFB1I1	-0.5655	-0.049057	-0.033294	0.34721	-0.096987	0.07266	0.352	passed	9198	none	none
TAMM41	0.1335	-0.016245	-0.047287	0.11279	-0.022937	-0.012342	0.76	passed	9198	none	none
ZNF280A	0.074351	-0.019833	-0.13663	0.13083	-0.097587	-0.2103	0.082	passed	9198	none	none
RPS6KC1	0.13501	0.038045	-0.42848	-0.06555	-0.23422	-0.20401	0.649	passed	9198	none	none
CBFA2T3	-0.91126	-0.082962	0.46676	-0.26019	-0.19971	-0.097318	0.894	passed	9198	hit	none
CREB3L3	0.02071	0.050523	0.085129	0.42525	-0.21683	-0.11473	0.664	passed	9198	none	none
ZNF417	-0.2077	-0.046545	0.17369	-0.36644	0.025287	0.40808	0.345	passed	9198	none	none
RASGEF1B	0.14051	-0.35378	0.097562	-0.11188	0.38055	-0.029356	0.855	passed	9198	none	hit
LAMTOR4	-0.13961	-0.058099	-0.079073	0.21997	0.037055	0.40571	0.071	passed	9198	none	none
P4HB	-0.58636	-0.27119	0.4648	0.46112	0.21531	0.25582	0.922	passed	9198	hit	none
TRIM69	-0.29867	-0.21319	0.095966	-0.30734	0.043307	-0.056279	0.09	passed	9198	none	none
OXA1L	-0.074475	0.073167	-0.014133	-0.34623	-0.046809	-0.21071	0.159	passed	9198	none	none
LGALS7	0.19939	0.13341	0.038538	0.044433	-0.045434	0.15355	0.233	passed	9198	none	none
FXYD3	-0.61843	-0.64955	0.058934	-0.24729	-0.15289	-0.018887	0.393	passed	9198	none	none
LZTS2	0.1075	-0.10039	-0.05397	0.09288	0.090917	-0.17452	0.243	passed	9198	none	none
KNL1	0.068928	-0.067444	-0.34569	-0.15675	-0.23908	-0.26045	NA	passed	9198	none	none
WNT3A	-0.092417	-0.14397	-0.031172	-0.49879	0.21058	-0.067307	0.985	passed	9198	none	none
MRPL11	0.045378	-0.14696	-0.051781	-0.31998	0.10548	-0.059402	0.096	passed	9198	none	none
ZNF562	-0.10994	-0.10603	0.23281	0.30407	0.064477	-0.17406	0.287	passed	9198	none	none
UBE3D	0.1847	-0.25628	0.13861	-0.095925	0.42624	0.20166	0.089	passed	9198	none	hit
FIBIN	-0.09963	0.022758	0.057983	-0.079841	0.029632	0.056324	0.183	passed	9198	none	none
TSPAN33	0.018219	0.041124	-0.020882	-0.115	-0.065064	-0.050319	0.455	passed	9198	none	none
ITGA1	-0.40812	-0.12862	0.21056	-0.087661	-0.019302	-0.085213	0.509	passed	9198	none	none
PLGLB2	-0.21876	-0.16429	-0.055395	0.19239	0.038722	0.44557	0.131	passed	9198	none	none
UTP3	0.25654	0.057591	-0.25278	0.02801	-0.050408	0.13394	0.13	passed	9198	none	none
LEAP2	-0.48582	-0.116	0.14873	0.22806	0.22672	0.33579	0.254	passed	9198	none	none
KRT79	-0.050895	-0.045138	0.051062	0.0622	-0.032601	0.073611	0.141	passed	9198	none	none
TPBG	-0.22638	-0.029453	0.086905	-0.16509	0.16442	0.2418	0.529	passed	9198	none	none
PPP1R16A	-0.16221	-0.09254	0.05858	0.16232	0.15085	-0.1945	0.244	passed	9198	none	none
CNNM1	-0.29426	-0.20055	-0.17242	0.33781	-0.096175	0.20667	0.523	passed	9198	none	none
ERICH4	-0.28251	0.055628	0.32498	0.35987	0.10349	-0.023334	NA	passed	9198	none	none
TNNT1	-0.12597	-0.29716	0.0373	0.15201	0.18452	0.13256	0.795	passed	9198	none	none
MOV10L1	-0.40511	-0.22422	-0.0014615	0.15909	0.18474	0.15142	0.758	passed	9198	none	none
TXNDC17	-0.26084	0.090803	-0.34174	0.17274	-0.093601	-0.075058	0.479	passed	9198	none	none
CCDC166	-0.04704	-0.12556	0.24174	0.055942	0.37464	0.39832	0.273	passed	9198	none	none
MTF1	-0.87196	-0.18598	0.48068	0.91336	-0.24064	0.18508	0.92	passed	9198	none	none
BTNL10	-0.16269	0.0045369	0.33388	0.092103	-0.11483	0.19591	NA	passed	9198	none	none
CAP1	-0.28315	0.035036	0.29752	0.5106	-0.061245	0.099841	0.742	passed	9198	none	none
ZNF497	0.15454	0.14333	-0.21301	-0.18481	-0.082162	-0.0073607	0.257	passed	9198	none	none
OR2AP1	-0.3024	-0.025934	0.22254	0.55554	-0.15378	-0.26716	NA	passed	9198	none	none
SPAG6	-0.53308	-0.11732	0.49326	0.70057	0.161	0.016066	0.308	passed	9198	none	none
TBCB	-0.1913	-0.17323	-0.10799	0.28683	-0.042722	0.1612	0.132	passed	9198	none	none
BEST2	-0.41453	-0.11401	0.22393	0.3892	-0.095517	-0.15072	0.439	passed	9198	none	none
ZNF677	-0.42768	-0.51917	-0.22819	0.10879	-0.011663	0.023344	0.179	passed	9198	none	none
GSTP1	-0.64287	-0.10111	0.75901	0.23535	0.077495	-0.11914	0.218	passed	9198	hit	none
PRLR	0.052414	0.0031932	-0.35539	-0.086037	-0.07947	-0.082139	0.929	passed	9198	none	none
GPM6B	-0.26708	-0.0076199	0.27575	0.42863	0.0093663	-0.1067	NA	passed	9198	none	none
SLC5A11	-0.092508	-0.22475	0.032009	0.023227	-0.04644	0.1738	0.236	passed	9198	none	none
ANKK1	-0.45535	-0.012076	0.40807	0.3667	0.043435	0.0068534	0.408	passed	9198	none	none
ETFA	-0.12643	-0.18992	0.17348	-0.10117	0.15109	0.4324	0.738	passed	9198	none	none
HPGD	-0.14309	-0.07896	-0.059173	0.072484	0.1243	0.23055	0.645	passed	9198	none	none
TLL2	0.053804	-0.14507	0.065152	-0.011019	0.25254	-0.0030243	0.256	passed	9198	none	none
FBXW12	0.035632	0.0061893	0.061898	0.18252	-0.10534	-0.15843	0.094	passed	9198	none	none
GLRX	-0.20697	0.0069498	0.18782	-0.11916	0.027816	-0.017589	0.242	passed	9198	none	none
CCR1	0.20039	-0.002166	-0.080588	0.22647	0.053956	-0.16041	0.087	passed	9198	none	none
TMEM234	0.019315	-0.13997	-0.01026	-0.057046	0.072936	0.001252	0.218	passed	9198	none	none
ASB1	0.059034	0.086615	-0.30886	0.051593	-0.27935	-0.10869	0.536	passed	9198	none	none
TSHR	-0.50081	-0.14172	0.35527	0.23672	0.02122	0.27005	0.508	passed	9198	none	none
GOLGA6D	-0.43322	0.19339	0.046202	-0.51398	-0.11509	-0.31422	0.066	passed	9198	none	none
CD300LD	0.26221	-0.13164	0.091018	-0.23493	-0.00031462	0.17089	0.242	passed	9198	none	none
GPR12	-0.2022	0.0076955	0.16595	-0.16558	0.028704	0.05137	0.407	passed	9198	none	none
TEX12	-0.25743	-0.059337	0.20709	0.17446	0.14855	-0.2395	0.346	passed	9198	none	none
ZFYVE26	-0.6273	-0.17516	0.26312	0.68224	-0.30094	0.04041	0.812	passed	9198	none	none
SLC22A7	-0.015939	-0.012609	0.18082	0.07385	0.098605	0.062146	0.248	passed	9198	none	none
STXBP2	-0.13731	0.036059	0.26641	0.16039	0.026184	-0.26886	0.279	passed	9198	none	none
TEDDM1	0.11425	0.10271	-0.16225	-0.3139	-0.16524	0.1256	0.047	passed	9198	none	none
CEP192	-0.12236	-0.35708	0.017829	0.34277	0.012419	0.43135	0.613	passed	9198	none	none
CTSE	-0.051064	0.16694	0.19153	-0.0015316	-0.21179	-0.12234	0.151	passed	9198	none	none
ETNK2	-0.021698	-0.078229	-0.049705	0.52476	0.17317	0.0016123	0.561	passed	9198	none	none
LANCL3	0.25792	-0.078754	-0.22537	-0.36167	0.10716	0.074906	NA	passed	9198	none	none
CHP2	-0.016464	-0.05069	0.11362	0.095689	0.050512	-0.30435	0.369	passed	9198	none	none
AMBRA1	-0.017347	0.11913	0.12208	0.059433	-0.18608	-0.32274	0.919	passed	9198	none	none
PFKL	-0.40739	-0.16898	0.19664	0.52606	0.11215	0.15052	0.497	passed	9198	none	none
CBLN4	-0.1768	-0.28053	0.099365	0.2656	-0.044981	0.21892	0.642	passed	9198	none	none
USP6NL	-0.053898	-0.17377	-0.32029	0.20658	0.037151	-0.13875	0.947	passed	9198	none	none
TFAP2C	-0.042779	-0.20075	-0.37805	0.018196	0.12329	-0.082419	0.996	passed	9198	none	none
CD55	-0.16486	0.0088461	0.19095	-0.077748	-0.17725	0.14402	0.254	passed	9198	none	none
PKN1	-0.74322	-0.22039	0.38199	0.54065	-0.111	0.22283	0.564	passed	9198	none	none
CD8B	0.18751	0.029435	0.09922	0.096186	-0.040252	0.078912	0.063	passed	9198	none	none
TPTE	-0.73781	-0.33054	0.016223	0.1889	-0.3634	0.081766	0.14	passed	9198	none	none
NUP88	0.12574	-0.048458	-0.22431	0.048943	-0.090545	-0.054223	0.884	passed	9198	none	none
PNMA6A	-0.10378	-0.029265	0.019721	0.34482	0.055413	-0.23089	NA	passed	9198	none	none
GAST	-0.17959	0.015224	-0.69186	-0.12959	-0.18822	0.033008	0.063	passed	9198	none	none
MAP2K1	0.031054	-0.071809	-0.038127	0.18064	0.078491	0.18253	0.924	passed	9198	none	none
DCAF4	0.18656	-0.046732	-0.35322	-0.038689	-0.035594	0.12901	0.368	passed	9198	none	none
LURAP1L	-0.19577	0.045482	0.14651	0.10486	-0.06009	-0.28976	0.383	passed	9198	none	none
CRTAC1	-0.10356	0.089569	0.23861	0.26327	-0.092323	-0.33248	0.706	passed	9198	none	none
FTHL17	-0.33618	-0.073589	0.36282	0.36317	0.11176	0.11358	NA	passed	9198	none	none
ZNF615	-0.044517	-0.097589	0.068352	-0.10578	0.13236	-0.075919	0.069	passed	9198	none	none
OCM2	-0.75881	-0.20534	1.0496	0.85649	0.11662	-0.25534	NA	passed	9198	none	none
SLC35E3	-0.18969	-0.11089	0.045631	-0.19553	-0.0014652	-0.18234	0.206	passed	9198	none	none
STX5	-0.019676	0.021266	-0.54812	0.34157	-0.48561	0.18894	0.346	passed	9198	none	none
KRTAP5-5	-0.35045	-0.083866	0.14199	0.048275	-0.084495	0.11861	0.778	passed	9198	none	none
CASC4	-0.27475	-0.047918	0.38409	-0.36265	0.10107	-0.043291	0.15	passed	9198	none	none
[truncated: 16,887 more rows]
